# Supplementary material for: Sperm miRNAs— potential mediators of bull age and early embryo development
Source: Research Square preprint supplement (doi:10.21203/rs.3.rs-23158/v3), 2020-10-27
Supplement: Supplementary file 1 [file 6be7b42b83abcc9312546dc0.xlsx]

## Sheet: Table S1
Table S1. Total RNA extracted from bovine spermatozoa
Bulls	Age	Number of straws	Concentration (pg/μL)	Total amount (ng)	RIN
Bull1 #03981	10 months	5	4432	132.96	2.4
	12 months	5	2361	70.83	2.5
	16 months	5	3056	91.68	2.5
Bull2 #06622	10 months	5	1581	47.43	2.4
	12 months	5	2774	83.22	2.5
	16 months	5	3641	109.23	2.5
Bull3 #10051	10 months	5	6809	204.27	2.4
	12 months	5	2205	66.15	2.4
	16 months	5	2889	86.67	2.5
Bull4 #10085	10 months	5	1892	56.76	2.4
	12 months	5	2173	65.19	2.4
	16 months	5	1011	30.33	2.5

## Sheet: Table S2
Table S2. Differentially expressed miRNA in the two contrasts
10 vs 16 months						12 vs 16 months
ID	baseMean	Fold Change	p-value	Sperm-born		ID	baseMean	Fold Change	p-value	Sperm-born
bta-mir-19b	75.9952	2.2	0.0028839	Yes		bta-mir-759	7.13322	4.99	0.000768783	Yes
bta-mir-133a	28.7493	1.89	0.0354099	Yes		bta-mir-2284z	2.57154	4.44	0.0212501	Yes
bta-mir-2285b	4.12108	-3.45	0.0272514	Yes		bta-mir-34b	17.0361	2.14	0.0226514	Yes
bta-mir-677	17.5952	-1.77	0.0411734	No (reported of high intensity in bovine MII oocyte)		bta-miR-219	1.11352	=-1/0	0.0405985	No (reported in COCs and low intensity in sperm)
bta-mir-148a	102.883	-1.7	0.0308687	No (reported of high intensity in bovine MII oocyte)		bta-miR-2334	3.05664	-4.35	0.0230247	Yes
bta-mir-2405	103.664	-1.52	0.0436459	Yes		bta-mir-2285e	12.5292	-2.44	0.010487	Yes
						bta-mir-302a	7.44894	-2.38	0.0400646	Yes
						bta-mir-2340	43.3886	-1.74	0.0219669	No (reported of high intensity in bovine MII oocyte)
Ref.: MII oocyte(Gilchrist et al. 2016), COCs (Andrade et al. 2017)

## Sheet: Table S3
Table S3. Dataset of targets expressed in 2-cell embryo of 10vs16 months contrast for IPA
Ortholog of target gene		FC of miRNA
CNN2	bta-miR-133a	1.89
PTBP1	bta-miR-133a	1.89
CLTA	bta-miR-133a	1.89
ZNF354A	bta-miR-133a	1.89
PPP2CA	bta-miR-133a	1.89
DOLPP1	bta-miR-133a	1.89
SLC6A1	bta-miR-133a	1.89
ENPP5	bta-miR-133a	1.89
RAP2C	bta-miR-133a	1.89
KIF3C	bta-miR-133a	1.89
TJP2	bta-miR-133a	1.89
SH3GL2	bta-miR-133a	1.89
UBA2	bta-miR-133a	1.89
ARFIP2	bta-miR-133a	1.89
GCH1	bta-miR-133a	1.89
GBA2	bta-miR-133a	1.89
SF3B4	bta-miR-133a	1.89
SHISA5	bta-miR-133a	1.89
EDEM1	bta-miR-133a	1.89
SNRK	bta-miR-133a	1.89
NRIP3	bta-miR-133a	1.89
TMEM128	bta-miR-133a	1.89
DUSP6	bta-miR-133a	1.89
WASF2	bta-miR-133a	1.89
RAVER1	bta-miR-133a	1.89
KIAA1429	bta-miR-133a	1.89
ZNF131	bta-miR-133a	1.89
SACM1L	bta-miR-133a	1.89
DUSP1	bta-miR-133a	1.89
ATP6V0D1	bta-miR-133a	1.89
RB1CC1	bta-miR-133a	1.89
CDK13	bta-miR-133a	1.89
PPFIA3	bta-miR-133a	1.89
MAP4	bta-miR-133a	1.89
CDC42SE2	bta-miR-133a	1.89
SLMO2	bta-miR-133a	1.89
PSMD10	bta-miR-133a	1.89
VAT1	bta-miR-133a	1.89
MSN	bta-miR-133a	1.89
MLLT3	bta-miR-133a	1.89
SLC35F5	bta-miR-133a	1.89
GRID2	bta-miR-133a	1.89
TOR2A	bta-miR-133a	1.89
ELAVL1	bta-miR-133a	1.89
AP1AR	bta-miR-133a	1.89
LPIN2	bta-miR-133a	1.89
PPFIA1	bta-miR-133a	1.89
PLCL2	bta-miR-133a	1.89
TMEM57	bta-miR-133a	1.89
SLC25A39	bta-miR-133a	1.89
SUPT16H	bta-miR-133a	1.89
FBXW11	bta-miR-133a	1.89
FAM19A5	bta-miR-133a	1.89
DCP1A	bta-miR-133a	1.89
SOCS2	bta-miR-133a	1.89
GDI2	bta-miR-133a	1.89
NIPA2	bta-miR-133a	1.89
CDCA8	bta-miR-133a	1.89
ASH1L	bta-miR-133a	1.89
STX5	bta-miR-133a	1.89
SLC8A2	bta-miR-133a	1.89
TMEM110	bta-miR-133a	1.89
SESN1	bta-miR-133a	1.89
ANKRD52	bta-miR-133a	1.89
GDI1	bta-miR-133a	1.89
UBFD1	bta-miR-133a	1.89
FSCN1	bta-miR-133a	1.89
ENTPD7	bta-miR-133a	1.89
XPO1	bta-miR-133a	1.89
KLHL2	bta-miR-133a	1.89
CSNK1G3	bta-miR-133a	1.89
FURIN	bta-miR-133a	1.89
IDH1	bta-miR-133a	1.89
EIF3J	bta-miR-133a	1.89
WTAP	bta-miR-133a	1.89
TFE3	bta-miR-133a	1.89
MTMR4	bta-miR-133a	1.89
LTBP1	bta-miR-133a	1.89
MAFG	bta-miR-133a	1.89
PLXNA3	bta-miR-133a	1.89
DNAJB1	bta-miR-133a	1.89
PTMA	bta-miR-133a	1.89
SIRT1	bta-miR-133a	1.89
CD47	bta-miR-133a	1.89
KDM2A	bta-miR-133a	1.89
PPP2R5E	bta-miR-133a	1.89
JAZF1	bta-miR-133a	1.89
DSTYK	bta-miR-133a	1.89
MYO9B	bta-miR-133a	1.89
UNK	bta-miR-133a	1.89
BTBD10	bta-miR-133a	1.89
TMX4	bta-miR-133a	1.89
SYT9	bta-miR-133a	1.89
ALDH5A1	bta-miR-133a	1.89
ANAPC1	bta-miR-133a	1.89
HMGXB3	bta-miR-133a	1.89
GDF11	bta-miR-133a	1.89
SORBS3	bta-miR-133a	1.89
MCL1	bta-miR-133a	1.89
ARHGAP24	bta-miR-133a	1.89
CNOT1	bta-miR-133a	1.89
SLC30A3	bta-miR-133a	1.89
UCK2	bta-miR-133a	1.89
MED8	bta-miR-133a	1.89
NMT1	bta-miR-133a	1.89
GMEB1	bta-miR-133a	1.89
DNAJC3	bta-miR-133a	1.89
HOXA9	bta-miR-133a	1.89
SH3PXD2B	bta-miR-133a	1.89
ARHGDIA	bta-miR-133a	1.89
TLCD2	bta-miR-133a	1.89
DMXL1	bta-miR-133a	1.89
UBTD2	bta-miR-133a	1.89
ATRX	bta-miR-133a	1.89
IGF1R	bta-miR-133a	1.89
NIPA1	bta-miR-133a	1.89
FBXL19	bta-miR-133a	1.89
EEF1A1	bta-miR-133a	1.89
SRPK1	bta-miR-133a	1.89
WBP4	bta-miR-133a	1.89
ACAT2	bta-miR-133a	1.89
FST	bta-miR-133a	1.89
IP6K1	bta-miR-133a	1.89
MRPL44	bta-miR-133a	1.89
SMARCD1	bta-miR-133a	1.89
SEMA4G	bta-miR-133a	1.89
CCNDBP1	bta-miR-133a	1.89
UBL3	bta-miR-19b	2.2
DNAJA2	bta-miR-19b	2.2
DCP2	bta-miR-19b	2.2
RHEBL1	bta-miR-19b	2.2
PIKFYVE	bta-miR-19b	2.2
CBFB	bta-miR-19b	2.2
RIN2	bta-miR-19b	2.2
PDCD6	bta-miR-19b	2.2
MAP2K3	bta-miR-19b	2.2
ARAP2	bta-miR-19b	2.2
EPC2	bta-miR-19b	2.2
CHMP4B	bta-miR-19b	2.2
EIF4G2	bta-miR-19b	2.2
IP6K1	bta-miR-19b	2.2
TMEM167B	bta-miR-19b	2.2
COL1A2	bta-miR-19b	2.2
DOCK3	bta-miR-19b	2.2
ZFAND5	bta-miR-19b	2.2
DOLK	bta-miR-2285b	-3.45
LLPH	bta-miR-2285b	-3.45
TM2D1	bta-miR-2285b	-3.45
TUBGCP5	bta-miR-2285b	-3.45
ACN9	bta-miR-2285b	-3.45
DAD1	bta-miR-2285b	-3.45
CNOT4	bta-miR-2285b	-3.45
CSN3	bta-miR-2285b	-3.45
SLC17A1	bta-miR-2285b	-3.45
TSEN34	bta-miR-2285b	-3.45
CHMP5	bta-miR-2285b	-3.45
PYROXD1	bta-miR-2285b	-3.45
IRF6	bta-miR-2285b	-3.45
EXOSC8	bta-miR-2285b	-3.45
ZBTB37	bta-miR-2285b	-3.45
NUDT10	bta-miR-2285b	-3.45
ATP6V0A2	bta-miR-2285b	-3.45
ANAPC13	bta-miR-2285b	-3.45
SI	bta-miR-2285b	-3.45
CITED2	bta-miR-2285b	-3.45
LIX1	bta-miR-2285b	-3.45
RRAS2	bta-miR-2285b	-3.45
COX15	bta-miR-2285b	-3.45
EPB41L2	bta-miR-2285b	-3.45
KRT6A	bta-miR-2285b	-3.45
CYP3A5	bta-miR-2285b	-3.45
METTL7A	bta-miR-2285b	-3.45
PEBP1	bta-miR-2285b	-3.45
SNAPC1	bta-miR-2285b	-3.45
CD164	bta-miR-2285b	-3.45
CLGN	bta-miR-2285b	-3.45
PPP1CB	bta-miR-2285b	-3.45
TIPRL	bta-miR-2285b	-3.45
BPNT1	bta-miR-2285b	-3.45
RCSD1	bta-miR-2285b	-3.45
FAM60A	bta-miR-2285b	-3.45
MRPL53	bta-miR-2285b	-3.45
MAPKAPK2	bta-miR-2285b	-3.45
USO1	bta-miR-2285b	-3.45
AZIN1	bta-miR-2285b	-3.45
BLZF1	bta-miR-2285b	-3.45
NDUFB3	bta-miR-2285b	-3.45
ATP1B3	bta-miR-2285b	-3.45
ZNF174	bta-miR-2285b	-3.45
TWF1	bta-miR-2285b	-3.45
PRKAA1	bta-miR-2285b	-3.45
HELLS	bta-miR-2285b	-3.45
GPBP1L1	bta-miR-2285b	-3.45
SERBP1	bta-miR-2285b	-3.45
UBE2G1	bta-miR-2285b	-3.45
SLC12A2	bta-miR-2285b	-3.45
METAP2	bta-miR-2285b	-3.45
VMA21	bta-miR-2285b	-3.45
BMP2	bta-miR-2285b	-3.45
HAS2	bta-miR-2285b	-3.45
CRELD2	bta-miR-2285b	-3.45
CXorf56	bta-miR-2285b	-3.45
MON2	bta-miR-2285b	-3.45
OSTM1	bta-miR-2285b	-3.45
PPIL4	bta-miR-2285b	-3.45
PRICKLE1	bta-miR-2285b	-3.45
ERO1L	bta-miR-2285b	-3.45
TCTN3	bta-miR-2285b	-3.45
TEX12	bta-miR-2285b	-3.45
GBAS	bta-miR-2285b	-3.45
EDEM3	bta-miR-2285b	-3.45
PRKRA	bta-miR-2285b	-3.45
SEP15	bta-miR-2285b	-3.45
SNRPA1	bta-miR-2285b	-3.45
PM20D1	bta-miR-2285b	-3.45
AAMP	bta-miR-2285b	-3.45
SNX24	bta-miR-2285b	-3.45
PRRC1	bta-miR-2285b	-3.45
UBE2D1	bta-miR-2285b	-3.45
RPE	bta-miR-2285b	-3.45
MPHOSPH6	bta-miR-2285b	-3.45
ACVR2A	bta-miR-2285b	-3.45
NFKBIA	bta-miR-2285b	-3.45
ISL1	bta-miR-2285b	-3.45
RPL7L1	bta-miR-2285b	-3.45
CCNC	bta-miR-2285b	-3.45
ATPAF1	bta-miR-2285b	-3.45
TAF13	bta-miR-2285b	-3.45
MRPS18C	bta-miR-2285b	-3.45
ZDHHC21	bta-miR-2285b	-3.45
TSPAN19	bta-miR-2285b	-3.45
LAPTM4A	bta-miR-2285b	-3.45
ZNF627	bta-miR-2285b	-3.45
REEP3	bta-miR-2285b	-3.45
BIN2	bta-miR-2285b	-3.45
PDP1	bta-miR-2285b	-3.45
ATP6V1C2	bta-miR-2285b	-3.45
PCNP	bta-miR-2285b	-3.45
HAUS4	bta-miR-2285b	-3.45
MYLIP	bta-miR-2285b	-3.45
CDKN1B	bta-miR-2285b	-3.45
HOXA3	bta-miR-2285b	-3.45
BTG1	bta-miR-2285b	-3.45
PRKACB	bta-miR-2285b	-3.45
HSD17B4	bta-miR-2285b	-3.45
OSGEPL1	bta-miR-2285b	-3.45
HDAC1	bta-miR-2285b	-3.45
LRRC4C	bta-miR-2285b	-3.45
CCNA2	bta-miR-2285b	-3.45
CPEB4	bta-miR-2285b	-3.45
CHCHD1	bta-miR-2285b	-3.45
PSMC2	bta-miR-2285b	-3.45
VSIG1	bta-miR-2285b	-3.45
TDRD7	bta-miR-2285b	-3.45
ZDHHC6	bta-miR-2285b	-3.45
NMD3	bta-miR-2285b	-3.45
UBAC2	bta-miR-2285b	-3.45
SCOC	bta-miR-2285b	-3.45
FOXN2	bta-miR-2285b	-3.45
C7orf57	bta-miR-2285b	-3.45
LPCAT2	bta-miR-2285b	-3.45
DPY30	bta-miR-2285b	-3.45
DIRC2	bta-miR-2285b	-3.45
DUSP19	bta-miR-2285b	-3.45
GALK2	bta-miR-2285b	-3.45
SNAP23	bta-miR-2285b	-3.45
DGKE	bta-miR-2285b	-3.45
PTAR1	bta-miR-2285b	-3.45
ATF2	bta-miR-2285b	-3.45
RBM25	bta-miR-2285b	-3.45
RASSF5	bta-miR-2285b	-3.45
RAB6A	bta-miR-2285b	-3.45
RCBTB2	bta-miR-2285b	-3.45
RAC2	bta-miR-2285b	-3.45
INO80D	bta-miR-2285b	-3.45
GNG12	bta-miR-2285b	-3.45
LCOR	bta-miR-2285b	-3.45
ERLIN1	bta-miR-2285b	-3.45
SNX6	bta-miR-2285b	-3.45
GRPEL2	bta-miR-2285b	-3.45
KHDRBS1	bta-miR-2285b	-3.45
NAA35	bta-miR-2285b	-3.45
RHOT1	bta-miR-2285b	-3.45
SCP2	bta-miR-2285b	-3.45
TCEAL4	bta-miR-2285b	-3.45
FERMT1	bta-miR-2285b	-3.45
REXO2	bta-miR-2285b	-3.45
ZDHHC2	bta-miR-2285b	-3.45
CDC26	bta-miR-2285b	-3.45
CPOX	bta-miR-2285b	-3.45
AUH	bta-miR-2285b	-3.45
SGOL1	bta-miR-2285b	-3.45
LRRC4	bta-miR-2285b	-3.45
TOP2B	bta-miR-2285b	-3.45
COMMD3	bta-miR-2285b	-3.45
CEP55	bta-miR-2285b	-3.45
BCAT1	bta-miR-2285b	-3.45
GDPD1	bta-miR-2285b	-3.45
TWISTNB	bta-miR-2285b	-3.45
MRPS17	bta-miR-2285b	-3.45
EBNA1BP2	bta-miR-2285b	-3.45
CDKL1	bta-miR-2285b	-3.45
AMFR	bta-miR-2285b	-3.45
UGT2B17	bta-miR-2285b	-3.45
RUFY2	bta-miR-2285b	-3.45
ATG12	bta-miR-2285b	-3.45
DYNLT3	bta-miR-2285b	-3.45
MRGPRX2	bta-miR-2285b	-3.45
GRB2	bta-miR-2285b	-3.45
PBK	bta-miR-2285b	-3.45
SRPX	bta-miR-2285b	-3.45
ZCCHC6	bta-miR-2285b	-3.45
LYSMD3	bta-miR-2285b	-3.45
UBE2R2	bta-miR-2285b	-3.45
SAT1	bta-miR-2285b	-3.45
SEC11A	bta-miR-2285b	-3.45
KCNK1	bta-miR-2285b	-3.45
RPS27A	bta-miR-2285b	-3.45
PPRC1	bta-miR-2285b	-3.45
HMGCS1	bta-miR-2285b	-3.45
MRPS18B	bta-miR-2285b	-3.45
POLR2G	bta-miR-2285b	-3.45
IMPACT	bta-miR-2285b	-3.45
MITF	bta-miR-2285b	-3.45
GRAMD1B	bta-miR-2285b	-3.45
PPP3CB	bta-miR-2285b	-3.45
ATP12A	bta-miR-2285b	-3.45
MMD	bta-miR-2285b	-3.45
GALNT11	bta-miR-2285b	-3.45
MRPS24	bta-miR-2285b	-3.45
FCHSD2	bta-miR-2285b	-3.45
PEX7	bta-miR-2285b	-3.45
HDAC8	bta-miR-2285b	-3.45
CXXC5	bta-miR-2285b	-3.45
ZMAT4	bta-miR-2285b	-3.45
JUN	bta-miR-2285b	-3.45
RNF111	bta-miR-2285b	-3.45
ISCA2	bta-miR-2285b	-3.45
FAM175B	bta-miR-2285b	-3.45
MED17	bta-miR-2285b	-3.45
PAPOLA	bta-miR-2285b	-3.45
HECTD2	bta-miR-2285b	-3.45
EIF4A2	bta-miR-2285b	-3.45
PARP9	bta-miR-2285b	-3.45
NOLC1	bta-miR-2285b	-3.45
BRMS1L	bta-miR-2285b	-3.45
LYRM1	bta-miR-2285b	-3.45
CHAD	bta-miR-2285b	-3.45
PRDM4	bta-miR-2285b	-3.45
KIF3B	bta-miR-2285b	-3.45
GTF2E1	bta-miR-2285b	-3.45
FZD3	bta-miR-2285b	-3.45
MANEA	bta-miR-2285b	-3.45
ABCE1	bta-miR-2285b	-3.45
ADAT2	bta-miR-2285b	-3.45
STK39	bta-miR-2285b	-3.45
RAB35	bta-miR-2285b	-3.45
TCEA1	bta-miR-2285b	-3.45
ARMC2	bta-miR-2285b	-3.45
NEDD1	bta-miR-2285b	-3.45
GSTCD	bta-miR-2285b	-3.45
BLOC1S2	bta-miR-2285b	-3.45
GFRAL	bta-miR-2285b	-3.45
SMAD6	bta-miR-2285b	-3.45
AIDA	bta-miR-2285b	-3.45
BCL10	bta-miR-2285b	-3.45
LARP7	bta-miR-2285b	-3.45
FNDC3B	bta-miR-2285b	-3.45
TOX3	bta-miR-2285b	-3.45
PLEKHA8	bta-miR-2285b	-3.45
SOSTDC1	bta-miR-2285b	-3.45
SELT	bta-miR-2285b	-3.45
KRT36	bta-miR-2285b	-3.45
BBS7	bta-miR-2285b	-3.45
AIMP1	bta-miR-2285b	-3.45
HTATSF1	bta-miR-2285b	-3.45
ZNF354C	bta-miR-2285b	-3.45
ZIC2	bta-miR-2285b	-3.45
MAN1A1	bta-miR-2285b	-3.45
MTMR7	bta-miR-2285b	-3.45
BATF2	bta-miR-2285b	-3.45
CSNK1A1	bta-miR-2285b	-3.45
CCBE1	bta-miR-2285b	-3.45
NIPBL	bta-miR-2285b	-3.45
RPS24	bta-miR-2285b	-3.45
CHN1	bta-miR-2285b	-3.45
ANKS1B	bta-miR-2285b	-3.45
WDR20	bta-miR-2285b	-3.45
GAS2	bta-miR-2285b	-3.45
SPIN1	bta-miR-2285b	-3.45
CBLB	bta-miR-2285b	-3.45
PDS5A	bta-miR-2285b	-3.45
ICK	bta-miR-2285b	-3.45
UPP2	bta-miR-2285b	-3.45
MCM6	bta-miR-2285b	-3.45
AKR1B1	bta-miR-2285b	-3.45
SUDS3	bta-miR-2285b	-3.45
ZNF22	bta-miR-2285b	-3.45
ARL15	bta-miR-2285b	-3.45
TMF1	bta-miR-2285b	-3.45
OSTF1	bta-miR-2285b	-3.45
LRRC6	bta-miR-2285b	-3.45
PPME1	bta-miR-2285b	-3.45
SIX3	bta-miR-2285b	-3.45
MRPL35	bta-miR-2285b	-3.45
MAFK	bta-miR-2285b	-3.45
DCTN5	bta-miR-2285b	-3.45
FKBP1B	bta-miR-2285b	-3.45
ZNF33B	bta-miR-2285b	-3.45
RBM7	bta-miR-2285b	-3.45
TMX1	bta-miR-2285b	-3.45
MCFD2	bta-miR-2285b	-3.45
WWC2	bta-miR-2285b	-3.45
PKN2	bta-miR-2285b	-3.45
AZI2	bta-miR-2285b	-3.45
GNAS	bta-miR-2285b	-3.45
PTCD3	bta-miR-2285b	-3.45
EEA1	bta-miR-2285b	-3.45
MEX3C	bta-miR-2285b	-3.45
TSNAX	bta-miR-2285b	-3.45
CCNG1	bta-miR-2285b	-3.45
PDS5B	bta-miR-2285b	-3.45
SHOC2	bta-miR-2285b	-3.45
TMEM43	bta-miR-2285b	-3.45
MIER1	bta-miR-2285b	-3.45
JAK2	bta-miR-2285b	-3.45
DIRAS2	bta-miR-2285b	-3.45
SHCBP1	bta-miR-2285b	-3.45
CYCS	bta-miR-2285b	-3.45
RCN1	bta-miR-2285b	-3.45
DPAGT1	bta-miR-2285b	-3.45
LIPA	bta-miR-2285b	-3.45
LEPROT	bta-miR-2285b	-3.45
CTTNBP2NL	bta-miR-2285b	-3.45
RMI2	bta-miR-2285b	-3.45
NKRF	bta-miR-2285b	-3.45
ZBTB33	bta-miR-2285b	-3.45
SNRNP40	bta-miR-2285b	-3.45
ZNF318	bta-miR-2285b	-3.45
CTBS	bta-miR-2285b	-3.45
CAT	bta-miR-2285b	-3.45
FGF16	bta-miR-2285b	-3.45
LAMA1	bta-miR-2285b	-3.45
RBM4B	bta-miR-2285b	-3.45
LZTFL1	bta-miR-2285b	-3.45
TRAFD1	bta-miR-2285b	-3.45
ILF2	bta-miR-2285b	-3.45
NUP54	bta-miR-2285b	-3.45
RAB2A	bta-miR-2285b	-3.45
PSENEN	bta-miR-2285b	-3.45
SMOC1	bta-miR-2285b	-3.45
CAND1	bta-miR-2285b	-3.45
PSIP1	bta-miR-2285b	-3.45
NOL12	bta-miR-2285b	-3.45
RAB11B	bta-miR-2285b	-3.45
HNRNPA1	bta-miR-2285b	-3.45
DTWD2	bta-miR-2285b	-3.45
TOR3A	bta-miR-2285b	-3.45
PPP1R8	bta-miR-2285b	-3.45
FBXO11	bta-miR-2285b	-3.45
GJB2	bta-miR-2285b	-3.45
CDC7	bta-miR-2285b	-3.45
GNB5	bta-miR-2285b	-3.45
CCDC14	bta-miR-2285b	-3.45
RPL23A	bta-miR-2285b	-3.45
CROT	bta-miR-2285b	-3.45
PAK3	bta-miR-2285b	-3.45
PIK3R1	bta-miR-2285b	-3.45
TDRD3	bta-miR-2285b	-3.45
PTPN12	bta-miR-2285b	-3.45
KIF16B	bta-miR-2285b	-3.45
FNBP1L	bta-miR-2285b	-3.45
UBE2W	bta-miR-2285b	-3.45
EML4	bta-miR-2285b	-3.45
NODAL	bta-miR-2285b	-3.45
COIL	bta-miR-2285b	-3.45
ZFX	bta-miR-2285b	-3.45
DNAJB14	bta-miR-2285b	-3.45
ZNF382	bta-miR-2285b	-3.45
MXI1	bta-miR-2285b	-3.45
STAT2	bta-miR-2285b	-3.45
SDHAF2	bta-miR-2285b	-3.45
GNG10	bta-miR-2285b	-3.45
YIPF5	bta-miR-2285b	-3.45
RAB8B	bta-miR-2285b	-3.45
EGF	bta-miR-2285b	-3.45
MNAT1	bta-miR-2285b	-3.45
TERF2IP	bta-miR-2285b	-3.45
IFT81	bta-miR-2285b	-3.45
UPF3A	bta-miR-2285b	-3.45
NDFIP2	bta-miR-2285b	-3.45
TMEM50A	bta-miR-2285b	-3.45
RNF167	bta-miR-2285b	-3.45
EFNA2	bta-miR-2285b	-3.45
COL4A3BP	bta-miR-2285b	-3.45
B3GALNT2	bta-miR-2285b	-3.45
DEPDC1B	bta-miR-2285b	-3.45
PGAP1	bta-miR-2285b	-3.45
SHQ1	bta-miR-2285b	-3.45
INTU	bta-miR-2285b	-3.45
FBXO3	bta-miR-2285b	-3.45
SGTA	bta-miR-2285b	-3.45
RTN4	bta-miR-2285b	-3.45
LAP3	bta-miR-2285b	-3.45
UXS1	bta-miR-2285b	-3.45
HSF1	bta-miR-2285b	-3.45
BTF3L4	bta-miR-2285b	-3.45
CAPN2	bta-miR-2285b	-3.45
FAM19A4	bta-miR-2285b	-3.45
NOS3	bta-miR-2285b	-3.45
OTUD1	bta-miR-2285b	-3.45
ERLEC1	bta-miR-2285b	-3.45
SMEK1	bta-miR-2285b	-3.45
CDADC1	bta-miR-2285b	-3.45
MEN1	bta-miR-2285b	-3.45
TBC1D15	bta-miR-2285b	-3.45
PRPS2	bta-miR-2285b	-3.45
TFRC	bta-miR-2285b	-3.45
KRT85	bta-miR-2285b	-3.45
TERF1	bta-miR-2285b	-3.45
FAM96A	bta-miR-2285b	-3.45
UBE3A	bta-miR-2285b	-3.45
PTP4A1	bta-miR-2285b	-3.45
NAAA	bta-miR-2285b	-3.45
TTC8	bta-miR-2285b	-3.45
LGMN	bta-miR-2285b	-3.45
FBXO45	bta-miR-2285b	-3.45
RNASEH1	bta-miR-2285b	-3.45
CDC5L	bta-miR-2285b	-3.45
SESTD1	bta-miR-2285b	-3.45
ZNFX1	bta-miR-2285b	-3.45
RGS7BP	bta-miR-2285b	-3.45
SEC23A	bta-miR-2285b	-3.45
STAT3	bta-miR-2285b	-3.45
TMEM214	bta-miR-2285b	-3.45
FGD4	bta-miR-2285b	-3.45
KIAA1737	bta-miR-2285b	-3.45
ZADH2	bta-miR-2285b	-3.45
ZCCHC4	bta-miR-2285b	-3.45
RAB11A	bta-miR-2285b	-3.45
UPRT	bta-miR-2285b	-3.45
TRIM37	bta-miR-2285b	-3.45
RNF145	bta-miR-2285b	-3.45
SAMD12	bta-miR-2285b	-3.45
ZNF624	bta-miR-2285b	-3.45
HIAT1	bta-miR-2285b	-3.45
SSX2IP	bta-miR-2285b	-3.45
RNPC3	bta-miR-2285b	-3.45
CLK3	bta-miR-2285b	-3.45
PRND	bta-miR-2285b	-3.45
MAPK9	bta-miR-2285b	-3.45
ARMC8	bta-miR-2285b	-3.45
ACBD5	bta-miR-2285b	-3.45
SH3BGRL2	bta-miR-2285b	-3.45
AADAT	bta-miR-2285b	-3.45
CCDC102B	bta-miR-2285b	-3.45
AP1S3	bta-miR-2285b	-3.45
KLF12	bta-miR-2285b	-3.45
ALG6	bta-miR-2285b	-3.45
PTGR2	bta-miR-2285b	-3.45
TSC22D2	bta-miR-2285b	-3.45
QPCT	bta-miR-2285b	-3.45
MIOS	bta-miR-2285b	-3.45
ATP11C	bta-miR-2285b	-3.45
USP42	bta-miR-2285b	-3.45
LRRC17	bta-miR-2285b	-3.45
ZEB1	bta-miR-2285b	-3.45
PEX3	bta-miR-2285b	-3.45
LIG4	bta-miR-2285b	-3.45
BLMH	bta-miR-2285b	-3.45
GPR63	bta-miR-2285b	-3.45
RNF214	bta-miR-2285b	-3.45
TPK1	bta-miR-2285b	-3.45
IGF2BP2	bta-miR-2285b	-3.45
PTH2R	bta-miR-2285b	-3.45
CTDSPL2	bta-miR-2285b	-3.45
NAP1L1	bta-miR-2285b	-3.45
C6orf120	bta-miR-2285b	-3.45
MOCS3	bta-miR-2285b	-3.45
CALU	bta-miR-2285b	-3.45
SAMD8	bta-miR-2285b	-3.45
NUDT12	bta-miR-2285b	-3.45
PWWP2A	bta-miR-2285b	-3.45
RFC3	bta-miR-2285b	-3.45
NUDT4	bta-miR-2285b	-3.45
USP28	bta-miR-2285b	-3.45
ICOS	bta-miR-2285b	-3.45
MEF2A	bta-miR-2285b	-3.45
MTO1	bta-miR-2285b	-3.45
CLIC4	bta-miR-2285b	-3.45
ARID1B	bta-miR-2285b	-3.45
FOXJ3	bta-miR-2285b	-3.45
PDCD5	bta-miR-2285b	-3.45
ZNF654	bta-miR-2285b	-3.45
SPRY2	bta-miR-2285b	-3.45
PGM1	bta-miR-2285b	-3.45
MARCKSL1	bta-miR-2285b	-3.45
MED28	bta-miR-2285b	-3.45
RRM2	bta-miR-2285b	-3.45
MYO6	bta-miR-2285b	-3.45
CTNNA3	bta-miR-2285b	-3.45
PTGES3	bta-miR-2285b	-3.45
SMAP1	bta-miR-2285b	-3.45
ZDHHC13	bta-miR-2285b	-3.45
NAB1	bta-miR-2285b	-3.45
SOAT1	bta-miR-2285b	-3.45
NUMBL	bta-miR-2285b	-3.45
DDHD2	bta-miR-2285b	-3.45
MESDC2	bta-miR-2285b	-3.45
STAG2	bta-miR-2285b	-3.45
NRXN1	bta-miR-2285b	-3.45
SOCS4	bta-miR-2285b	-3.45
RPP14	bta-miR-2285b	-3.45
ARF6	bta-miR-2285b	-3.45
NOL4	bta-miR-2285b	-3.45
CCDC77	bta-miR-2285b	-3.45
PPP1R3C	bta-miR-2285b	-3.45
ZNF383	bta-miR-2285b	-3.45
TMEM65	bta-miR-2285b	-3.45
UCHL5	bta-miR-2285b	-3.45
TMEM9B	bta-miR-2285b	-3.45
LRCH1	bta-miR-2285b	-3.45
ZNF692	bta-miR-2285b	-3.45
DAB2IP	bta-miR-2285b	-3.45
PTPRM	bta-miR-2285b	-3.45
ZNF135	bta-miR-2285b	-3.45
NAA30	bta-miR-2285b	-3.45
LHFPL2	bta-miR-2285b	-3.45
PPM1E	bta-miR-2285b	-3.45
GABRA4	bta-miR-2285b	-3.45
EEF2K	bta-miR-2285b	-3.45
GCNT1	bta-miR-2285b	-3.45
CD46	bta-miR-2285b	-3.45
FBXO8	bta-miR-2285b	-3.45
STOM	bta-miR-2285b	-3.45
TMEM107	bta-miR-2285b	-3.45
WDR31	bta-miR-2285b	-3.45
TNFAIP8L1	bta-miR-2285b	-3.45
GFM1	bta-miR-2285b	-3.45
RFX5	bta-miR-2285b	-3.45
ATM	bta-miR-2285b	-3.45
HMBOX1	bta-miR-2285b	-3.45
NUBPL	bta-miR-2285b	-3.45
ALDH1A2	bta-miR-2285b	-3.45
C16orf80	bta-miR-2285b	-3.45
BECN1	bta-miR-2285b	-3.45
SLC10A7	bta-miR-2285b	-3.45
UBE2F	bta-miR-2285b	-3.45
NR2C2	bta-miR-2285b	-3.45
SCN11A	bta-miR-2285b	-3.45
IRF8	bta-miR-2285b	-3.45
PIAS2	bta-miR-2285b	-3.45
PCOLCE2	bta-miR-2285b	-3.45
STK36	bta-miR-2285b	-3.45
UBE2B	bta-miR-2285b	-3.45
SGCB	bta-miR-2285b	-3.45
CLCN5	bta-miR-2285b	-3.45
PGRMC2	bta-miR-2285b	-3.45
GMPS	bta-miR-2285b	-3.45
SPAG6	bta-miR-2285b	-3.45
PARVA	bta-miR-2285b	-3.45
GOLGA7	bta-miR-2285b	-3.45
MBOAT1	bta-miR-2285b	-3.45
BRD3	bta-miR-2285b	-3.45
FAM83D	bta-miR-2285b	-3.45
SLC44A5	bta-miR-2285b	-3.45
MDM4	bta-miR-2285b	-3.45
TMCC2	bta-miR-2285b	-3.45
CLIP3	bta-miR-2285b	-3.45
HPS3	bta-miR-2285b	-3.45
RBL2	bta-miR-2285b	-3.45
PPP4R2	bta-miR-2285b	-3.45
FDX1	bta-miR-2285b	-3.45
LRP11	bta-miR-2285b	-3.45
ARL6	bta-miR-2285b	-3.45
DDX21	bta-miR-2285b	-3.45
ORMDL1	bta-miR-2285b	-3.45
GPAM	bta-miR-2285b	-3.45
ZMAT3	bta-miR-2285b	-3.45
LRRC59	bta-miR-2285b	-3.45
RALGPS2	bta-miR-2285b	-3.45
DUSP11	bta-miR-2285b	-3.45
CS	bta-miR-2285b	-3.45
THUMPD1	bta-miR-2285b	-3.45
UBE2N	bta-miR-2285b	-3.45
VPS37A	bta-miR-2285b	-3.45
ENPP1	bta-miR-2285b	-3.45
GNA14	bta-miR-2285b	-3.45
AK2	bta-miR-2285b	-3.45
STEAP2	bta-miR-2285b	-3.45
MCPH1	bta-miR-2285b	-3.45
PRKRIP1	bta-miR-2285b	-3.45
GOPC	bta-miR-2285b	-3.45
TRIAP1	bta-miR-2285b	-3.45
MBNL2	bta-miR-2285b	-3.45
HOOK3	bta-miR-2285b	-3.45
TMEM19	bta-miR-2285b	-3.45
PROCR	bta-miR-2285b	-3.45
CEP350	bta-miR-2285b	-3.45
GFPT1	bta-miR-2285b	-3.45
SPAG9	bta-miR-2285b	-3.45
USP48	bta-miR-2285b	-3.45
ESF1	bta-miR-2285b	-3.45
AKIRIN1	bta-miR-2285b	-3.45
TESK2	bta-miR-2285b	-3.45
CCDC73	bta-miR-2285b	-3.45
GABPA	bta-miR-2285b	-3.45
VPS39	bta-miR-2285b	-3.45
STX12	bta-miR-2285b	-3.45
HEXIM1	bta-miR-2285b	-3.45
APPL2	bta-miR-2285b	-3.45
SBF2	bta-miR-2285b	-3.45
YIPF6	bta-miR-2285b	-3.45
VPS13A	bta-miR-2285b	-3.45
SPTAN1	bta-miR-2285b	-3.45
MBTD1	bta-miR-2285b	-3.45
ZC3H13	bta-miR-2285b	-3.45
DSG2	bta-miR-2285b	-3.45
TMEM194A	bta-miR-2285b	-3.45
DLAT	bta-miR-2285b	-3.45
RHOU	bta-miR-2285b	-3.45
MBNL1	bta-miR-2285b	-3.45
ARCN1	bta-miR-2285b	-3.45
M6PR	bta-miR-2285b	-3.45
OSMR	bta-miR-2285b	-3.45
ZNF24	bta-miR-2285b	-3.45
ANP32E	bta-miR-2285b	-3.45
CYP4V2	bta-miR-2285b	-3.45
DZIP3	bta-miR-2285b	-3.45
ZCWPW2	bta-miR-2285b	-3.45
MARVELD3	bta-miR-2285b	-3.45
ELL	bta-miR-2285b	-3.45
LARP4	bta-miR-2285b	-3.45
AEBP2	bta-miR-2285b	-3.45
CCNB1IP1	bta-miR-2285b	-3.45
RRAGC	bta-miR-2285b	-3.45
NT5DC1	bta-miR-2285b	-3.45
VEZF1	bta-miR-2285b	-3.45
EIF2AK3	bta-miR-2285b	-3.45
DOCK10	bta-miR-2285b	-3.45
FBXO36	bta-miR-2285b	-3.45
KCTD9	bta-miR-2285b	-3.45
ARL13B	bta-miR-2285b	-3.45
SPATA2	bta-miR-2285b	-3.45
GATAD2A	bta-miR-2285b	-3.45
AKTIP	bta-miR-2285b	-3.45
PRDX3	bta-miR-2285b	-3.45
DNAJC25	bta-miR-2285b	-3.45
HERC3	bta-miR-2285b	-3.45
NUDT3	bta-miR-2285b	-3.45
NIN	bta-miR-2285b	-3.45
ARL6IP1	bta-miR-2285b	-3.45
STRN	bta-miR-2285b	-3.45
SLC39A11	bta-miR-2285b	-3.45
LRAT	bta-miR-2285b	-3.45
PPIG	bta-miR-2285b	-3.45
HBP1	bta-miR-2285b	-3.45
MYB	bta-miR-2285b	-3.45
CCNJ	bta-miR-2285b	-3.45
ESRP1	bta-miR-2285b	-3.45
SOHLH2	bta-miR-2285b	-3.45
LHX3	bta-miR-2285b	-3.45
MAP3K7	bta-miR-2285b	-3.45
RPS6KA6	bta-miR-2285b	-3.45
RBM46	bta-miR-2285b	-3.45
RFX7	bta-miR-2285b	-3.45
TRAF4	bta-miR-2285b	-3.45
MCM9	bta-miR-2285b	-3.45
CD2AP	bta-miR-2285b	-3.45
CDH7	bta-miR-2285b	-3.45
ATG3	bta-miR-2285b	-3.45
CYP51A1	bta-miR-2285b	-3.45
MPZL1	bta-miR-2285b	-3.45
CHSY3	bta-miR-2285b	-3.45
PLEKHB2	bta-miR-2285b	-3.45
XIAP	bta-miR-2285b	-3.45
CASP3	bta-miR-2285b	-3.45
PHF16	bta-miR-2285b	-3.45
SEC24B	bta-miR-2285b	-3.45
RSPRY1	bta-miR-2285b	-3.45
KCNC1	bta-miR-2285b	-3.45
CASC5	bta-miR-2285b	-3.45
NCOA4	bta-miR-2285b	-3.45
NUDT5	bta-miR-2285b	-3.45
MTFR1	bta-miR-2285b	-3.45
RPL22L1	bta-miR-2285b	-3.45
CNIH4	bta-miR-2285b	-3.45
LEPROTL1	bta-miR-2285b	-3.45
DDAH1	bta-miR-2285b	-3.45
NDUFA5	bta-miR-2285b	-3.45
NET1	bta-miR-2285b	-3.45
WDFY1	bta-miR-2285b	-3.45
CPS1	bta-miR-2285b	-3.45
TMEM41A	bta-miR-2285b	-3.45
BRCC3	bta-miR-2285b	-3.45
NBR1	bta-miR-2285b	-3.45
ZNF154	bta-miR-2285b	-3.45
RALA	bta-miR-2285b	-3.45
OLA1	bta-miR-2285b	-3.45
HMMR	bta-miR-2285b	-3.45
SLC41A2	bta-miR-2285b	-3.45
RBBP4	bta-miR-2285b	-3.45
RPS6	bta-miR-2285b	-3.45
AMN1	bta-miR-2285b	-3.45
C8orf47	bta-miR-2285b	-3.45
LARS	bta-miR-2285b	-3.45
BCL9	bta-miR-2285b	-3.45
CDC42BPA	bta-miR-2285b	-3.45
TFCP2	bta-miR-2285b	-3.45
VPS26A	bta-miR-2285b	-3.45
ATP2B1	bta-miR-2285b	-3.45
YAF2	bta-miR-2285b	-3.45
MBLAC2	bta-miR-2285b	-3.45
FRMD4B	bta-miR-2285b	-3.45
TNFAIP8L3	bta-miR-2285b	-3.45
PPP2R5B	bta-miR-2285b	-3.45
ESD	bta-miR-2285b	-3.45
ATP5E	bta-miR-2285b	-3.45
ITCH	bta-miR-2285b	-3.45
HABP4	bta-miR-2285b	-3.45
EML1	bta-miR-2285b	-3.45
MAP7	bta-miR-2285b	-3.45
PLAGL1	bta-miR-2285b	-3.45
WFIKKN2	bta-miR-2285b	-3.45
LRRTM2	bta-miR-2285b	-3.45
GPR3	bta-miR-2285b	-3.45
EEF2	bta-miR-2285b	-3.45
OXCT1	bta-miR-2285b	-3.45
DCTN6	bta-miR-2285b	-3.45
LSM14A	bta-miR-2285b	-3.45
APH1A	bta-miR-2285b	-3.45
ZNF415	bta-miR-2285b	-3.45
UHMK1	bta-miR-2285b	-3.45
IP6K2	bta-miR-2285b	-3.45
UHRF2	bta-miR-2285b	-3.45
SLC25A40	bta-miR-2285b	-3.45
ISOC1	bta-miR-2285b	-3.45
UBN2	bta-miR-2285b	-3.45
ZNF79	bta-miR-2285b	-3.45
RPL37	bta-miR-2285b	-3.45
CHMP2B	bta-miR-2285b	-3.45
ZBTB44	bta-miR-2285b	-3.45
SUCLG2	bta-miR-2285b	-3.45
CCDC85A	bta-miR-2285b	-3.45
MMD2	bta-miR-2285b	-3.45
TPP2	bta-miR-2285b	-3.45
PDK1	bta-miR-2285b	-3.45
MKX	bta-miR-2285b	-3.45
PRKG1	bta-miR-2285b	-3.45
PRMT3	bta-miR-2285b	-3.45
TRIP11	bta-miR-2285b	-3.45
CDV3	bta-miR-2285b	-3.45
PAFAH1B2	bta-miR-2285b	-3.45
ARFIP1	bta-miR-2285b	-3.45
MAL2	bta-miR-2285b	-3.45
INPP4A	bta-miR-2285b	-3.45
CHRAC1	bta-miR-2285b	-3.45
ZBTB6	bta-miR-2285b	-3.45
CYP20A1	bta-miR-2285b	-3.45
STT3B	bta-miR-2285b	-3.45
FPGT	bta-miR-2285b	-3.45
PTGIS	bta-miR-2285b	-3.45
ZBTB5	bta-miR-2285b	-3.45
PAQR3	bta-miR-2285b	-3.45
EIF3L	bta-miR-2285b	-3.45
FAM177A1	bta-miR-2285b	-3.45
OSBPL9	bta-miR-2285b	-3.45
PPP1R2	bta-miR-2285b	-3.45
ROCK1	bta-miR-2285b	-3.45
CNST	bta-miR-2285b	-3.45
IQGAP1	bta-miR-2285b	-3.45
TSC1	bta-miR-2285b	-3.45
UBE2Q2	bta-miR-2285b	-3.45
DHTKD1	bta-miR-2285b	-3.45
UBE2E2	bta-miR-2285b	-3.45
RAB11FIP2	bta-miR-2285b	-3.45
MRPS16	bta-miR-2285b	-3.45
LIMA1	bta-miR-2285b	-3.45
PDIA6	bta-miR-2285b	-3.45
ZCCHC7	bta-miR-2285b	-3.45
WNT2B	bta-miR-2285b	-3.45
GJA1	bta-miR-2285b	-3.45
RPS6KB1	bta-miR-2285b	-3.45
USP39	bta-miR-2285b	-3.45
SNAPC3	bta-miR-2285b	-3.45
TMEFF1	bta-miR-2285b	-3.45
FKBP1A	bta-miR-2285b	-3.45
AHR	bta-miR-2285b	-3.45
CPE	bta-miR-2285b	-3.45
RNMT	bta-miR-2285b	-3.45
MOCS2	bta-miR-2285b	-3.45
NUDT11	bta-miR-2285b	-3.45
CCDC126	bta-miR-2285b	-3.45
WDR12	bta-miR-2285b	-3.45
ANO4	bta-miR-2285b	-3.45
VWC2L	bta-miR-2285b	-3.45
STAG1	bta-miR-2285b	-3.45
B4GALT6	bta-miR-2285b	-3.45
PPAT	bta-miR-2285b	-3.45
EPN2	bta-miR-2285b	-3.45
BNIPL	bta-miR-2285b	-3.45
TRPM3	bta-miR-2285b	-3.45
SLC30A7	bta-miR-2285b	-3.45
RPL9	bta-miR-2285b	-3.45
H2AFY	bta-miR-2285b	-3.45
ACBD3	bta-miR-2285b	-3.45
RCAN3	bta-miR-2285b	-3.45
ARHGEF19	bta-miR-2285b	-3.45
ACOX1	bta-miR-2285b	-3.45
SLC6A5	bta-miR-2285b	-3.45
KLHDC1	bta-miR-2285b	-3.45
SERINC5	bta-miR-2285b	-3.45
TANK	bta-miR-2285b	-3.45
DGKH	bta-miR-2285b	-3.45
CA2	bta-miR-2285b	-3.45
AUTS2	bta-miR-2285b	-3.45
SLC30A4	bta-miR-2285b	-3.45
ENY2	bta-miR-2285b	-3.45
TMEM169	bta-miR-2285b	-3.45
DYM	bta-miR-2285b	-3.45
MYO1E	bta-miR-2285b	-3.45
NEDD4	bta-miR-2285b	-3.45
TRNT1	bta-miR-2285b	-3.45
CPEB2	bta-miR-2285b	-3.45
ATXN1	bta-miR-2285b	-3.45
RAP1A	bta-miR-2285b	-3.45
IL6ST	bta-miR-2285b	-3.45
ACSL6	bta-miR-2285b	-3.45
ATXN7L1	bta-miR-2285b	-3.45
FBXO33	bta-miR-2285b	-3.45
MAP3K1	bta-miR-2285b	-3.45
TPRG1L	bta-miR-2285b	-3.45
PCCA	bta-miR-2285b	-3.45
TMX3	bta-miR-2285b	-3.45
LRIG2	bta-miR-2285b	-3.45
LRRC8B	bta-miR-2285b	-3.45
TACSTD2	bta-miR-2285b	-3.45
CLIP1	bta-miR-2285b	-3.45
FKTN	bta-miR-2285b	-3.45
CCDC50	bta-miR-2285b	-3.45
RABEP2	bta-miR-2285b	-3.45
PRKAA2	bta-miR-2285b	-3.45
MYO9A	bta-miR-2285b	-3.45
MAN2A1	bta-miR-2285b	-3.45
CHMP1B	bta-miR-2285b	-3.45
PDE4DIP	bta-miR-2285b	-3.45
TIMM8A	bta-miR-2285b	-3.45
NUTF2	bta-miR-2285b	-3.45
YTHDF1	bta-miR-2285b	-3.45
SLC4A7	bta-miR-2285b	-3.45
TMEM209	bta-miR-2285b	-3.45
CACNA2D1	bta-miR-2285b	-3.45
GPR133	bta-miR-2285b	-3.45
CHD4	bta-miR-2285b	-3.45
TUBGCP4	bta-miR-2285b	-3.45
TPX2	bta-miR-2285b	-3.45
RAB11FIP1	bta-miR-2285b	-3.45
NAMPT	bta-miR-2285b	-3.45
SLC44A1	bta-miR-2285b	-3.45
BTF3	bta-miR-2285b	-3.45
PBX3	bta-miR-2285b	-3.45
MT1A	bta-miR-2285b	-3.45
EIF5	bta-miR-2285b	-3.45
TMOD2	bta-miR-2285b	-3.45
SLC16A2	bta-miR-2285b	-3.45
FAM92A1	bta-miR-2285b	-3.45
SLC16A10	bta-miR-2285b	-3.45
PURG	bta-miR-2285b	-3.45
PRPF38A	bta-miR-2285b	-3.45
RASL10B	bta-miR-2285b	-3.45
ATG10	bta-miR-2285b	-3.45
ZYG11B	bta-miR-2285b	-3.45
NHS	bta-miR-2285b	-3.45
ZNRF2	bta-miR-2285b	-3.45
RAB3GAP1	bta-miR-2285b	-3.45
LIFR	bta-miR-2285b	-3.45
ENAH	bta-miR-2285b	-3.45
NETO2	bta-miR-2285b	-3.45
ZDHHC9	bta-miR-2285b	-3.45
AR	bta-miR-2285b	-3.45
RNF144B	bta-miR-2285b	-3.45
MSL1	bta-miR-2285b	-3.45
ELK3	bta-miR-2285b	-3.45
LCP2	bta-miR-2285b	-3.45
PDE12	bta-miR-2285b	-3.45
IPP	bta-miR-2285b	-3.45
CREBL2	bta-miR-2285b	-3.45
ELOVL2	bta-miR-2285b	-3.45
DFFA	bta-miR-2285b	-3.45
HNRNPA3	bta-miR-2285b	-3.45
G3BP2	bta-miR-2285b	-3.45
ROBO2	bta-miR-2285b	-3.45
GDA	bta-miR-2285b	-3.45
TTC9C	bta-miR-2285b	-3.45
ATE1	bta-miR-2285b	-3.45
SNX10	bta-miR-2285b	-3.45
PCGF5	bta-miR-2285b	-3.45
MFAP3	bta-miR-2285b	-3.45
SORCS1	bta-miR-2285b	-3.45
MYEF2	bta-miR-2285b	-3.45
PHF17	bta-miR-2285b	-3.45
LAMP2	bta-miR-2285b	-3.45
APBB2	bta-miR-2285b	-3.45
FYTTD1	bta-miR-2285b	-3.45
NCEH1	bta-miR-2285b	-3.45
WIPF2	bta-miR-2285b	-3.45
POU2F1	bta-miR-2285b	-3.45
PHLDB2	bta-miR-2285b	-3.45
AGFG1	bta-miR-2285b	-3.45
MTUS1	bta-miR-2285b	-3.45
CPEB3	bta-miR-2285b	-3.45
POLE3	bta-miR-2285b	-3.45
TDRD1	bta-miR-2285b	-3.45
GIPC2	bta-miR-2285b	-3.45
RNF217	bta-miR-2285b	-3.45
BBX	bta-miR-2285b	-3.45
DDX24	bta-miR-2285b	-3.45
TXNL4B	bta-miR-2285b	-3.45
RBBP5	bta-miR-2285b	-3.45
ZNF800	bta-miR-2285b	-3.45
THAP6	bta-miR-2285b	-3.45
DLG1	bta-miR-2285b	-3.45
PRKCI	bta-miR-2285b	-3.45
TNRC6A	bta-miR-2285b	-3.45
ELMOD1	bta-miR-2285b	-3.45
TMEM30B	bta-miR-2285b	-3.45
STX6	bta-miR-2285b	-3.45
GLCE	bta-miR-2285b	-3.45
BRWD1	bta-miR-2285b	-3.45
GMCL1	bta-miR-2285b	-3.45
SUMO3	bta-miR-2285b	-3.45
YTHDC2	bta-miR-2285b	-3.45
KIF14	bta-miR-2285b	-3.45
GCLM	bta-miR-2285b	-3.45
SMAD2	bta-miR-2285b	-3.45
CISD1	bta-miR-2285b	-3.45
MPP7	bta-miR-2285b	-3.45
SPAG16	bta-miR-2285b	-3.45
PAICS	bta-miR-2285b	-3.45
GLRX3	bta-miR-2285b	-3.45
KCTD12	bta-miR-2285b	-3.45
SCML2	bta-miR-2285b	-3.45
STK38L	bta-miR-2285b	-3.45
TMCO1	bta-miR-2285b	-3.45
E2F4	bta-miR-2285b	-3.45
NBEAL1	bta-miR-2285b	-3.45
RC3H1	bta-miR-2285b	-3.45
STC1	bta-miR-2285b	-3.45
GOLGA5	bta-miR-2285b	-3.45
MTF2	bta-miR-2285b	-3.45
COQ6	bta-miR-2285b	-3.45
SPRED2	bta-miR-2285b	-3.45
TXNDC15	bta-miR-2285b	-3.45
POMP	bta-miR-2285b	-3.45
HIST1H2BN	bta-miR-2285b	-3.45
WDR11	bta-miR-2285b	-3.45
RORA	bta-miR-2285b	-3.45
GNA13	bta-miR-2285b	-3.45
ERN1	bta-miR-2285b	-3.45
H2AFV	bta-miR-2285b	-3.45
RRAGD	bta-miR-2285b	-3.45
LNX2	bta-miR-2285b	-3.45
RICTOR	bta-miR-2285b	-3.45
NR1I2	bta-miR-2285b	-3.45
RAD1	bta-miR-2285b	-3.45
TLK1	bta-miR-2285b	-3.45
KATNAL1	bta-miR-2285b	-3.45
ZFAND3	bta-miR-2285b	-3.45
DCUN1D3	bta-miR-2285b	-3.45
FAM120A	bta-miR-2285b	-3.45
ZNF445	bta-miR-2285b	-3.45
JARID2	bta-miR-2285b	-3.45
DMRT2	bta-miR-2285b	-3.45
FER	bta-miR-2285b	-3.45
FBXL7	bta-miR-2285b	-3.45
CHMP6	bta-miR-2285b	-3.45
SYT11	bta-miR-2285b	-3.45
MACC1	bta-miR-2285b	-3.45
TGFBR3	bta-miR-2285b	-3.45
UTP6	bta-miR-2285b	-3.45
KLHL18	bta-miR-2285b	-3.45
ABCA9	bta-miR-2285b	-3.45
RAD23B	bta-miR-2285b	-3.45
UBR2	bta-miR-2285b	-3.45
KRAS	bta-miR-2285b	-3.45
GOLPH3L	bta-miR-2285b	-3.45
MRE11A	bta-miR-2285b	-3.45
PRDM8	bta-miR-2285b	-3.45
SLC35B4	bta-miR-2285b	-3.45
PGM3	bta-miR-2285b	-3.45
MTF1	bta-miR-2285b	-3.45
PROSC	bta-miR-2285b	-3.45
VKORC1L1	bta-miR-2285b	-3.45
COPS7B	bta-miR-2285b	-3.45
ERGIC2	bta-miR-2285b	-3.45
GNG2	bta-miR-2285b	-3.45
TTC5	bta-miR-2285b	-3.45
RBMS3	bta-miR-2285b	-3.45
SLC4A4	bta-miR-2285b	-3.45
ZNF529	bta-miR-2285b	-3.45
KIF7	bta-miR-2285b	-3.45
AGMAT	bta-miR-2285b	-3.45
CD44	bta-miR-2285b	-3.45
MGAT2	bta-miR-2285b	-3.45
STX16	bta-miR-2285b	-3.45
ARL5B	bta-miR-2285b	-3.45
HBS1L	bta-miR-2285b	-3.45
RGS18	bta-miR-2285b	-3.45
MYSM1	bta-miR-2285b	-3.45
ZNF10	bta-miR-2285b	-3.45
FLT3	bta-miR-2285b	-3.45
HOOK1	bta-miR-2285b	-3.45
CTH	bta-miR-2285b	-3.45
TMEM163	bta-miR-2285b	-3.45
SPTBN1	bta-miR-2285b	-3.45
PHAX	bta-miR-2285b	-3.45
COBLL1	bta-miR-2285b	-3.45
LPAR3	bta-miR-2285b	-3.45
PSEN1	bta-miR-2285b	-3.45
EHD4	bta-miR-2285b	-3.45
FBXO21	bta-miR-2285b	-3.45
SLIT3	bta-miR-2285b	-3.45
KBTBD7	bta-miR-2285b	-3.45
ARPC4	bta-miR-2285b	-3.45
SLC39A9	bta-miR-2285b	-3.45
IER3IP1	bta-miR-2285b	-3.45
TTBK2	bta-miR-2285b	-3.45
PGK1	bta-miR-2285b	-3.45
GPC4	bta-miR-2285b	-3.45
ABCG2	bta-miR-2285b	-3.45
OSGIN2	bta-miR-2285b	-3.45
WDR70	bta-miR-2285b	-3.45
PCDHA13	bta-miR-2285b	-3.45
TACC1	bta-miR-2285b	-3.45
WDR5	bta-miR-2285b	-3.45
SPATS2	bta-miR-2285b	-3.45
TMEM47	bta-miR-2285b	-3.45
CNOT6L	bta-miR-2285b	-3.45
PIWIL3	bta-miR-2285b	-3.45
NAA50	bta-miR-2285b	-3.45
GOSR2	bta-miR-2285b	-3.45
BCL2L11	bta-miR-2285b	-3.45
RBM8A	bta-miR-2285b	-3.45
SLC23A2	bta-miR-2285b	-3.45
TAF5	bta-miR-2285b	-3.45
AMZ1	bta-miR-2285b	-3.45
CCNL1	bta-miR-2285b	-3.45
CLIP4	bta-miR-2285b	-3.45
ZW10	bta-miR-2285b	-3.45
STK24	bta-miR-2285b	-3.45
TNKS	bta-miR-2285b	-3.45
MRAS	bta-miR-2285b	-3.45
RAB14	bta-miR-2285b	-3.45
RIC8B	bta-miR-2285b	-3.45
FGFR1OP	bta-miR-2285b	-3.45
RAB21	bta-miR-2285b	-3.45
PPM1A	bta-miR-2285b	-3.45
CHFR	bta-miR-2285b	-3.45
FAT1	bta-miR-2285b	-3.45
ZNF638	bta-miR-2285b	-3.45
GPR20	bta-miR-2285b	-3.45
LRRC49	bta-miR-2285b	-3.45
RAB18	bta-miR-2285b	-3.45
TNRC6C	bta-miR-2285b	-3.45
CHURC1	bta-miR-2285b	-3.45
TOR1AIP2	bta-miR-2285b	-3.45
ETV1	bta-miR-2285b	-3.45
INA	bta-miR-2285b	-3.45
PPM1L	bta-miR-2285b	-3.45
GAD1	bta-miR-2285b	-3.45
PHYHIPL	bta-miR-2285b	-3.45
EIF4E3	bta-miR-2285b	-3.45
PRDM6	bta-miR-2285b	-3.45
MAK16	bta-miR-2285b	-3.45
UBXN2A	bta-miR-2285b	-3.45
NRIP1	bta-miR-2285b	-3.45
SNX13	bta-miR-2285b	-3.45
UBQLN2	bta-miR-2285b	-3.45
KDM4C	bta-miR-2285b	-3.45
PLXDC1	bta-miR-2285b	-3.45
NR1D2	bta-miR-2285b	-3.45
PANK3	bta-miR-2285b	-3.45
PPP6C	bta-miR-2285b	-3.45
USP24	bta-miR-2285b	-3.45
POU3F1	bta-miR-2285b	-3.45
HSPA12A	bta-miR-2285b	-3.45
SNAP25	bta-miR-2285b	-3.45
ITPR1	bta-miR-2285b	-3.45
PREPL	bta-miR-2285b	-3.45
EXTL3	bta-miR-2285b	-3.45
TMEM168	bta-miR-2285b	-3.45
CBX1	bta-miR-2285b	-3.45
SEC24A	bta-miR-2285b	-3.45
OSBPL6	bta-miR-2285b	-3.45
CPSF2	bta-miR-2285b	-3.45
TMEM64	bta-miR-2285b	-3.45
CDK1	bta-miR-2285b	-3.45
BVES	bta-miR-2285b	-3.45
EDNRA	bta-miR-2285b	-3.45
EIF2S1	bta-miR-2285b	-3.45
RBM3	bta-miR-2285b	-3.45
MMP16	bta-miR-2285b	-3.45
STXBP4	bta-miR-2285b	-3.45
GAB1	bta-miR-2285b	-3.45
TNKS2	bta-miR-2285b	-3.45
ACTR2	bta-miR-2285b	-3.45
STOML1	bta-miR-2285b	-3.45
SLC25A30	bta-miR-2285b	-3.45
CBX5	bta-miR-2285b	-3.45
YIPF4	bta-miR-2285b	-3.45
JMJD1C	bta-miR-2285b	-3.45
MRPL3	bta-miR-2285b	-3.45
BRWD3	bta-miR-2285b	-3.45
AMIGO1	bta-miR-2285b	-3.45
REL	bta-miR-2285b	-3.45
CLASP2	bta-miR-2285b	-3.45
ANKRD13A	bta-miR-2285b	-3.45
RAPGEF6	bta-miR-2285b	-3.45
CHL1	bta-miR-2285b	-3.45
SENP7	bta-miR-2285b	-3.45
BACH1	bta-miR-2285b	-3.45
SLC36A1	bta-miR-2285b	-3.45
ELAVL3	bta-miR-2285b	-3.45
MAPK10	bta-miR-2285b	-3.45
ARHGAP19	bta-miR-2285b	-3.45
MYH10	bta-miR-2285b	-3.45
LTBP2	bta-miR-2285b	-3.45
PCDH19	bta-miR-2285b	-3.45
USP34	bta-miR-2285b	-3.45
ZRANB1	bta-miR-2285b	-3.45
RBM22	bta-miR-2285b	-3.45
GTF2A1	bta-miR-2285b	-3.45
FTO	bta-miR-2285b	-3.45
HIPK1	bta-miR-2285b	-3.45
KDM5A	bta-miR-2285b	-3.45
TXNDC12	bta-miR-2285b	-3.45
ATMIN	bta-miR-2285b	-3.45
NOTCH2	bta-miR-2285b	-3.45
TRIM33	bta-miR-2285b	-3.45
GPRIN3	bta-miR-2285b	-3.45
ZBTB43	bta-miR-2285b	-3.45
STON1	bta-miR-2285b	-3.45
AGGF1	bta-miR-2285b	-3.45
WARS2	bta-miR-2285b	-3.45
CYP19A1	bta-miR-2285b	-3.45
AP1G1	bta-miR-2285b	-3.45
GNAI3	bta-miR-2285b	-3.45
PPP2R5A	bta-miR-2285b	-3.45
RCHY1	bta-miR-2285b	-3.45
STRN3	bta-miR-2285b	-3.45
MAP1B	bta-miR-2285b	-3.45
SCG3	bta-miR-2285b	-3.45
CTDSP2	bta-miR-2285b	-3.45
DPY19L3	bta-miR-2285b	-3.45
TBC1D19	bta-miR-2285b	-3.45
SDC2	bta-miR-2285b	-3.45
LYRM7	bta-miR-2285b	-3.45
MIPOL1	bta-miR-2285b	-3.45
TMEM39A	bta-miR-2285b	-3.45
TP53INP1	bta-miR-2285b	-3.45
TNFRSF19	bta-miR-2285b	-3.45
LRRC8C	bta-miR-2285b	-3.45
WDR48	bta-miR-2285b	-3.45
PIAS1	bta-miR-2285b	-3.45
SLC6A2	bta-miR-2285b	-3.45
DUSP10	bta-miR-2285b	-3.45
TRIM24	bta-miR-2285b	-3.45
DCAF12	bta-miR-2285b	-3.45
ZSCAN12	bta-miR-2285b	-3.45
KDSR	bta-miR-2285b	-3.45
ALAD	bta-miR-2285b	-3.45
FAM151B	bta-miR-2285b	-3.45
SPRED1	bta-miR-2285b	-3.45
KIN	bta-miR-2285b	-3.45
DCUN1D1	bta-miR-2285b	-3.45
RBBP8	bta-miR-2285b	-3.45
RAD50	bta-miR-2285b	-3.45
RAD54B	bta-miR-2285b	-3.45
ALDH1L2	bta-miR-2285b	-3.45
TCF12	bta-miR-2285b	-3.45
TRIM26	bta-miR-2285b	-3.45
GRK4	bta-miR-2285b	-3.45
SLC6A4	bta-miR-2285b	-3.45
ITGA4	bta-miR-2285b	-3.45
UBR1	bta-miR-2285b	-3.45
BAMBI	bta-miR-2285b	-3.45
PAFAH1B1	bta-miR-2285b	-3.45
BACE2	bta-miR-2285b	-3.45
AGPAT5	bta-miR-2285b	-3.45
WSB2	bta-miR-2285b	-3.45
KIF2A	bta-miR-2285b	-3.45
ANKRD49	bta-miR-2285b	-3.45
AGO2	bta-miR-2285b	-3.45
ACSS3	bta-miR-2285b	-3.45
PHF6	bta-miR-2285b	-3.45
ERG	bta-miR-2285b	-3.45
GTF2I	bta-miR-2285b	-3.45
UBA5	bta-miR-2285b	-3.45
PNMA2	bta-miR-2285b	-3.45
ARHGAP5	bta-miR-2285b	-3.45
FREM1	bta-miR-2285b	-3.45
OSBPL8	bta-miR-2285b	-3.45
WDR41	bta-miR-2285b	-3.45
GRSF1	bta-miR-2285b	-3.45
FMR1	bta-miR-2285b	-3.45
YWHAG	bta-miR-2285b	-3.45
YWHAQ	bta-miR-2285b	-3.45
HIF1A	bta-miR-2285b	-3.45
IRF2BP2	bta-miR-2285b	-3.45
LMBRD2	bta-miR-2285b	-3.45
ZNF292	bta-miR-2285b	-3.45
UHRF1BP1	bta-miR-2285b	-3.45
DNA2	bta-miR-2285b	-3.45
FGFR2	bta-miR-2285b	-3.45
EXOC5	bta-miR-2285b	-3.45
N4BP1	bta-miR-2285b	-3.45
NLN	bta-miR-2285b	-3.45
NEK7	bta-miR-2285b	-3.45
ZCCHC17	bta-miR-2285b	-3.45
UBE2L3	bta-miR-2285b	-3.45
UBTF	bta-miR-2285b	-3.45
SETX	bta-miR-2285b	-3.45
IDH3A	bta-miR-2285b	-3.45
TSN	bta-miR-2285b	-3.45
GNS	bta-miR-2285b	-3.45
TMEM14C	bta-miR-2285b	-3.45
COPS2	bta-miR-2285b	-3.45
SOX5	bta-miR-2285b	-3.45
ZRANB3	bta-miR-2285b	-3.45
USP37	bta-miR-2285b	-3.45
GK	bta-miR-2285b	-3.45
BAG5	bta-miR-2285b	-3.45
SAR1B	bta-miR-2285b	-3.45
PCF11	bta-miR-2285b	-3.45
PTGS1	bta-miR-2285b	-3.45
MTSS1	bta-miR-2285b	-3.45
CLCN3	bta-miR-2285b	-3.45
CDH1	bta-miR-2285b	-3.45
NFATC2	bta-miR-2285b	-3.45
WWP2	bta-miR-2285b	-3.45
RNF222	bta-miR-2285b	-3.45
PCMTD2	bta-miR-2285b	-3.45
NUMA1	bta-miR-2285b	-3.45
SSTR3	bta-miR-2285b	-3.45
MTCH1	bta-miR-2285b	-3.45
SLC9A9	bta-miR-2285b	-3.45
ZBTB39	bta-miR-2285b	-3.45
NFATC3	bta-miR-2285b	-3.45
LONRF1	bta-miR-2285b	-3.45
NOX5	bta-miR-2285b	-3.45
LRP6	bta-miR-2285b	-3.45
PRIMA1	bta-miR-2285b	-3.45
DOCK9	bta-miR-2285b	-3.45
GSPT1	bta-miR-2285b	-3.45
ATP11A	bta-miR-2285b	-3.45
KLF17	bta-miR-2285b	-3.45
E2F3	bta-miR-2285b	-3.45
CADM3	bta-miR-2285b	-3.45
LYN	bta-miR-2285b	-3.45
RNF26	bta-miR-2285b	-3.45
ITGA6	bta-miR-2285b	-3.45
NKX2-2	bta-miR-2285b	-3.45
DMWD	bta-miR-2285b	-3.45
GRHL2	bta-miR-2285b	-3.45
CHST10	bta-miR-2285b	-3.45
EI24	bta-miR-2285b	-3.45
FAM117A	bta-miR-2285b	-3.45
MAX	bta-miR-2285b	-3.45
WRB	bta-miR-2285b	-3.45
DIS3	bta-miR-2285b	-3.45
PRKCH	bta-miR-2285b	-3.45
ZNF646	bta-miR-2285b	-3.45
AKAP11	bta-miR-2285b	-3.45
TAT	bta-miR-2285b	-3.45
SCN8A	bta-miR-2285b	-3.45
SEPT9	bta-miR-2285b	-3.45
IGSF11	bta-miR-2285b	-3.45
CTNNB1	bta-miR-2285b	-3.45
ATP2B4	bta-miR-2285b	-3.45
FAM124B	bta-miR-2285b	-3.45
CHM	bta-miR-2285b	-3.45
ADH5	bta-miR-2285b	-3.45
KDR	bta-miR-2285b	-3.45
FSD1	bta-miR-2285b	-3.45
MAP2K4	bta-miR-2285b	-3.45
PFKFB2	bta-miR-2285b	-3.45
WDR52	bta-miR-2285b	-3.45
INPP5F	bta-miR-2285b	-3.45
CAMKV	bta-miR-2285b	-3.45
SEC14L3	bta-miR-2285b	-3.45
ANLN	bta-miR-2285b	-3.45
DSP	bta-miR-2285b	-3.45
PHF20	bta-miR-2285b	-3.45
ZNF572	bta-miR-2285b	-3.45
RCBTB1	bta-miR-2285b	-3.45
HAS3	bta-miR-2285b	-3.45
ARHGAP21	bta-miR-2285b	-3.45
KLHL32	bta-miR-2285b	-3.45
SNX29	bta-miR-2285b	-3.45
GFPT2	bta-miR-2285b	-3.45
BAZ1B	bta-miR-2285b	-3.45
SLC26A2	bta-miR-2285b	-3.45
FAM46B	bta-miR-2285b	-3.45
MRPL4	bta-miR-2285b	-3.45
ABR	bta-miR-2285b	-3.45
DLG5	bta-miR-2285b	-3.45
FXR2	bta-miR-2285b	-3.45
JPH3	bta-miR-2285b	-3.45
ATRN	bta-miR-2285b	-3.45
PLEKHA6	bta-miR-2285b	-3.45
PDZD8	bta-miR-2285b	-3.45
MYADM	bta-miR-2285b	-3.45
SLC39A14	bta-miR-2285b	-3.45
THBS1	bta-miR-2285b	-3.45
POMGNT1	bta-miR-2285b	-3.45
MYLK	bta-miR-2285b	-3.45
HECA	bta-miR-2285b	-3.45
CNNM2	bta-miR-2285b	-3.45
LANCL1	bta-miR-2285b	-3.45
FAM122A	bta-miR-2285b	-3.45
GAB2	bta-miR-2285b	-3.45
PDXP	bta-miR-2285b	-3.45
NANOS1	bta-miR-2285b	-3.45
SEC62	bta-miR-2285b	-3.45
HMGXB4	bta-miR-2285b	-3.45
MYO1B	bta-miR-2285b	-3.45
RANBP10	bta-miR-2285b	-3.45
SNX14	bta-miR-2285b	-3.45
H2AFJ	bta-miR-2285b	-3.45
SEPT11	bta-miR-2285b	-3.45
VTI1B	bta-miR-2285b	-3.45
FAR1	bta-miR-2285b	-3.45
ZNF793	bta-miR-2285b	-3.45
AKAP6	bta-miR-2285b	-3.45
PTPN14	bta-miR-2285b	-3.45
PPTC7	bta-miR-2285b	-3.45
SRGAP1	bta-miR-2285b	-3.45
PLCH2	bta-miR-2285b	-3.45
TRPS1	bta-miR-2285b	-3.45
ST13	bta-miR-2285b	-3.45
AGPAT3	bta-miR-2285b	-3.45
TRMT6	bta-miR-2285b	-3.45
ARMC10	bta-miR-2285b	-3.45
NHLRC2	bta-miR-2285b	-3.45
ARL1	bta-miR-2285b	-3.45
NAPEPLD	bta-miR-2285b	-3.45
SEC22C	bta-miR-2285b	-3.45
DHX36	bta-miR-2285b	-3.45
NRG1	bta-miR-2285b	-3.45
NAV2	bta-miR-2285b	-3.45
CDC25C	bta-miR-2285b	-3.45
BLCAP	bta-miR-2285b	-3.45
PTCH1	bta-miR-2285b	-3.45
MEST	bta-miR-2285b	-3.45
CTDSPL	bta-miR-2285b	-3.45
KCTD15	bta-miR-2285b	-3.45
ZZZ3	bta-miR-2285b	-3.45
PRKD3	bta-miR-2285b	-3.45
TMEM206	bta-miR-2285b	-3.45
ARF1	bta-miR-2285b	-3.45
SLC10A6	bta-miR-2285b	-3.45
RTF1	bta-miR-2285b	-3.45
ZSCAN20	bta-miR-2285b	-3.45
ALCAM	bta-miR-2285b	-3.45
PPIC	bta-miR-2285b	-3.45
DPP8	bta-miR-2285b	-3.45
PDE3A	bta-miR-2285b	-3.45
CREBZF	bta-miR-2285b	-3.45
PCCB	bta-miR-2285b	-3.45
CD109	bta-miR-2285b	-3.45
SEPT2	bta-miR-2285b	-3.45
KIAA1715	bta-miR-2285b	-3.45
SDAD1	bta-miR-2285b	-3.45
TLN1	bta-miR-2285b	-3.45
NOL7	bta-miR-2285b	-3.45
WASL	bta-miR-2285b	-3.45
FBXL20	bta-miR-2285b	-3.45
POPDC3	bta-miR-2285b	-3.45
ZNF652	bta-miR-2285b	-3.45
ERLIN2	bta-miR-2285b	-3.45
PIGM	bta-miR-2285b	-3.45
EEPD1	bta-miR-2285b	-3.45
RSPH3	bta-miR-2285b	-3.45
SATB1	bta-miR-2285b	-3.45
UGT8	bta-miR-2285b	-3.45
TGIF2	bta-miR-2285b	-3.45
SLMAP	bta-miR-2285b	-3.45
WAPAL	bta-miR-2285b	-3.45
DMBX1	bta-miR-2285b	-3.45
UTP15	bta-miR-2285b	-3.45
RGP1	bta-miR-2285b	-3.45
SAP18	bta-miR-2285b	-3.45
KPNA1	bta-miR-2285b	-3.45
VTI1A	bta-miR-2285b	-3.45
SMAD4	bta-miR-2285b	-3.45
STRADB	bta-miR-2285b	-3.45
MEF2C	bta-miR-2285b	-3.45
NFKBIE	bta-miR-2285b	-3.45
MYNN	bta-miR-2285b	-3.45
SLC12A6	bta-miR-2285b	-3.45
SGCD	bta-miR-2285b	-3.45
MED13L	bta-miR-2285b	-3.45
CTPS2	bta-miR-2285b	-3.45
ACSL5	bta-miR-2285b	-3.45
PIK3C3	bta-miR-2285b	-3.45
AGPS	bta-miR-2285b	-3.45
SLC36A4	bta-miR-2285b	-3.45
NEDD4L	bta-miR-2285b	-3.45
SCYL3	bta-miR-2285b	-3.45
CYR61	bta-miR-2285b	-3.45
USP6NL	bta-miR-2285b	-3.45
GAR1	bta-miR-2285b	-3.45
ZNF592	bta-miR-2285b	-3.45
SAP30BP	bta-miR-2285b	-3.45
PNPT1	bta-miR-2285b	-3.45
MFF	bta-miR-2285b	-3.45
NEGR1	bta-miR-2285b	-3.45
RBM12B	bta-miR-2285b	-3.45
ZFP36L1	bta-miR-2285b	-3.45
ABCB7	bta-miR-2285b	-3.45
HELZ	bta-miR-2285b	-3.45
FOSB	bta-miR-2285b	-3.45
GLE1	bta-miR-2285b	-3.45
LMO4	bta-miR-2285b	-3.45
RCN2	bta-miR-2285b	-3.45
PBX1	bta-miR-2285b	-3.45
KBTBD2	bta-miR-2285b	-3.45
ARHGAP29	bta-miR-2285b	-3.45
SEMA5A	bta-miR-2285b	-3.45
PRPF4B	bta-miR-2285b	-3.45
PAK1IP1	bta-miR-2285b	-3.45
GJC1	bta-miR-2285b	-3.45
GPATCH8	bta-miR-2285b	-3.45
SYTL3	bta-miR-2285b	-3.45
SNX1	bta-miR-2285b	-3.45
GOSR1	bta-miR-2285b	-3.45
CASD1	bta-miR-2285b	-3.45
SORL1	bta-miR-2285b	-3.45
RHOBTB1	bta-miR-2285b	-3.45
FBXO34	bta-miR-2285b	-3.45
KIF27	bta-miR-2285b	-3.45
TCHP	bta-miR-2285b	-3.45
PAPOLG	bta-miR-2285b	-3.45
CBFA2T2	bta-miR-2285b	-3.45
SMG1	bta-miR-2285b	-3.45
SAR1A	bta-miR-2285b	-3.45
FAM102A	bta-miR-2285b	-3.45
ATXN3	bta-miR-2285b	-3.45
SHOX2	bta-miR-2285b	-3.45
ZMYND11	bta-miR-2285b	-3.45
OPN1SW	bta-miR-2285b	-3.45
YOD1	bta-miR-2285b	-3.45
ZNF532	bta-miR-2285b	-3.45
LMOD3	bta-miR-2285b	-3.45
CAPRIN2	bta-miR-2285b	-3.45
SLC7A6	bta-miR-2285b	-3.45
ARL5A	bta-miR-2285b	-3.45
PUM2	bta-miR-2285b	-3.45
SH3KBP1	bta-miR-2285b	-3.45
IPO11	bta-miR-2285b	-3.45
GPR107	bta-miR-2285b	-3.45
UBR3	bta-miR-2285b	-3.45
USP31	bta-miR-2285b	-3.45
SLC7A11	bta-miR-2285b	-3.45
ERBB2IP	bta-miR-2285b	-3.45
SEPT8	bta-miR-2285b	-3.45
CALML4	bta-miR-2285b	-3.45
GAN	bta-miR-2285b	-3.45
HRH1	bta-miR-2285b	-3.45
ETV6	bta-miR-2285b	-3.45
HAUS5	bta-miR-2285b	-3.45
NID1	bta-miR-2285b	-3.45
RHBDD1	bta-miR-2285b	-3.45
MKI67	bta-miR-2285b	-3.45
DCAF17	bta-miR-2285b	-3.45
CHEK1	bta-miR-2285b	-3.45
SYNRG	bta-miR-2285b	-3.45
SLC40A1	bta-miR-2285b	-3.45
SALL4	bta-miR-2285b	-3.45
IGFBPL1	bta-miR-2285b	-3.45
ETNK1	bta-miR-2285b	-3.45
ZC3H8	bta-miR-2285b	-3.45
RPH3AL	bta-miR-2285b	-3.45
EIF3H	bta-miR-2285b	-3.45
DRG1	bta-miR-2285b	-3.45
WDHD1	bta-miR-2285b	-3.45
RIOK2	bta-miR-2285b	-3.45
SIAE	bta-miR-2285b	-3.45
IL13RA1	bta-miR-2285b	-3.45
NSF	bta-miR-2285b	-3.45
FN1	bta-miR-2285b	-3.45
GNPNAT1	bta-miR-2285b	-3.45
BMPR1A	bta-miR-2285b	-3.45
NUP50	bta-miR-2285b	-3.45
RDX	bta-miR-2285b	-3.45
IMPAD1	bta-miR-2285b	-3.45
VCPIP1	bta-miR-2285b	-3.45
HSPA2	bta-miR-2285b	-3.45
PHC3	bta-miR-2285b	-3.45
METTL14	bta-miR-2285b	-3.45
PURA	bta-miR-2285b	-3.45
ITGA11	bta-miR-2285b	-3.45
SPCS3	bta-miR-2285b	-3.45
DDHD1	bta-miR-2285b	-3.45
SLC25A26	bta-miR-2285b	-3.45
KLHDC10	bta-miR-2285b	-3.45
ZC3H14	bta-miR-2285b	-3.45
MBOAT2	bta-miR-2285b	-3.45
IRS4	bta-miR-2285b	-3.45
FEM1C	bta-miR-2285b	-3.45
SUB1	bta-miR-2285b	-3.45
WDR43	bta-miR-2285b	-3.45
NDUFS1	bta-miR-2285b	-3.45
SENP1	bta-miR-2285b	-3.45
ARHGEF2	bta-miR-2285b	-3.45
IPCEF1	bta-miR-2285b	-3.45
COL27A1	bta-miR-2285b	-3.45
MTPN	bta-miR-2285b	-3.45
SRP72	bta-miR-2285b	-3.45
TNPO1	bta-miR-2285b	-3.45
CHAC1	bta-miR-2285b	-3.45
MAT2B	bta-miR-2285b	-3.45
LDLRAD3	bta-miR-2285b	-3.45
NUPL1	bta-miR-2285b	-3.45
SETD1B	bta-miR-2285b	-3.45
HIF3A	bta-miR-2285b	-3.45
TRIM2	bta-miR-2285b	-3.45
CFTR	bta-miR-2285b	-3.45
TXLNB	bta-miR-2285b	-3.45
SLK	bta-miR-2285b	-3.45
DHRS12	bta-miR-2285b	-3.45
KDM1B	bta-miR-2285b	-3.45
GOLGA1	bta-miR-2285b	-3.45
KCNN3	bta-miR-2285b	-3.45
POLA1	bta-miR-2285b	-3.45
ATXN1L	bta-miR-2285b	-3.45
OPRK1	bta-miR-2285b	-3.45
RTKN2	bta-miR-2285b	-3.45
ARHGEF3	bta-miR-2285b	-3.45
GRASP	bta-miR-2285b	-3.45
AFF3	bta-miR-2285b	-3.45
PDHX	bta-miR-2285b	-3.45
PSTPIP2	bta-miR-2285b	-3.45
RBM28	bta-miR-2285b	-3.45
VTA1	bta-miR-2285b	-3.45
HLCS	bta-miR-2285b	-3.45
DIP2B	bta-miR-2285b	-3.45
DYNC1I2	bta-miR-2285b	-3.45
PSMB5	bta-miR-2285b	-3.45
GTPBP4	bta-miR-2285b	-3.45
WDFY3	bta-miR-2285b	-3.45
PYGO1	bta-miR-2285b	-3.45
BRIP1	bta-miR-2285b	-3.45
ANKLE2	bta-miR-2285b	-3.45
CAB39L	bta-miR-2285b	-3.45
LHX4	bta-miR-2285b	-3.45
OTUD3	bta-miR-2285b	-3.45
DGKI	bta-miR-2285b	-3.45
CPT1A	bta-miR-2285b	-3.45
SETDB2	bta-miR-2285b	-3.45
AVPR1A	bta-miR-2285b	-3.45
C1GALT1	bta-miR-2285b	-3.45
SPTLC2	bta-miR-2285b	-3.45
ZFR	bta-miR-2285b	-3.45
MARK1	bta-miR-2285b	-3.45
MXD1	bta-miR-2285b	-3.45
PPARGC1A	bta-miR-2285b	-3.45
ATF7IP	bta-miR-2285b	-3.45
KIAA1324L	bta-miR-2285b	-3.45
ANKH	bta-miR-2285b	-3.45
SORT1	bta-miR-2285b	-3.45
ILDR2	bta-miR-2285b	-3.45
TRIM13	bta-miR-2285b	-3.45
ABAT	bta-miR-2285b	-3.45
SUGT1	bta-miR-2285b	-3.45
PDHB	bta-miR-2285b	-3.45
UBE2D3	bta-miR-2285b	-3.45
OPA1	bta-miR-2285b	-3.45
HNRNPC	bta-miR-2285b	-3.45
CAPN7	bta-miR-2285b	-3.45
DOCK5	bta-miR-2285b	-3.45
ZNF462	bta-miR-2285b	-3.45
MRPS30	bta-miR-2285b	-3.45
FEM1B	bta-miR-2285b	-3.45
TBL1XR1	bta-miR-2285b	-3.45
SUV420H1	bta-miR-2285b	-3.45
NF2	bta-miR-2285b	-3.45
ZDHHC3	bta-miR-2285b	-3.45
WDR59	bta-miR-2285b	-3.45
ACTR8	bta-miR-2285b	-3.45
ZCCHC11	bta-miR-2285b	-3.45
MRPS25	bta-miR-2285b	-3.45
MOSPD2	bta-miR-2285b	-3.45
RFX3	bta-miR-2285b	-3.45
RAB3GAP2	bta-miR-2285b	-3.45
HS3ST3A1	bta-miR-2285b	-3.45
MEX3A	bta-miR-2285b	-3.45
OXNAD1	bta-miR-2285b	-3.45
SMU1	bta-miR-2285b	-3.45
RANBP2	bta-miR-2285b	-3.45
ZCCHC9	bta-miR-2285b	-3.45
AFF1	bta-miR-2285b	-3.45
TRAF3IP1	bta-miR-2285b	-3.45
CCRN4L	bta-miR-2285b	-3.45
PTGFRN	bta-miR-2285b	-3.45
TUBB	bta-miR-2285b	-3.45
MPP5	bta-miR-2285b	-3.45
NAA25	bta-miR-2285b	-3.45
ENPP4	bta-miR-2285b	-3.45
ANTXR2	bta-miR-2285b	-3.45
RND2	bta-miR-2285b	-3.45
DCBLD2	bta-miR-2285b	-3.45
TARS	bta-miR-2285b	-3.45
RSF1	bta-miR-2285b	-3.45
ADCY2	bta-miR-2285b	-3.45
NCOA3	bta-miR-2285b	-3.45
CRBN	bta-miR-2285b	-3.45
MAP2	bta-miR-2285b	-3.45
USP13	bta-miR-2285b	-3.45
WDR76	bta-miR-2285b	-3.45
BMPR2	bta-miR-2285b	-3.45
SLC30A1	bta-miR-2285b	-3.45
ATP5F1	bta-miR-2285b	-3.45
RABEP1	bta-miR-2285b	-3.45
DYNC1LI1	bta-miR-2285b	-3.45
RAB10	bta-miR-2285b	-3.45
SNIP1	bta-miR-2285b	-3.45
LNPEP	bta-miR-2285b	-3.45
MAPK8	bta-miR-2285b	-3.45
THEM4	bta-miR-2285b	-3.45
NSL1	bta-miR-2285b	-3.45
SIN3A	bta-miR-2285b	-3.45
TARSL2	bta-miR-2285b	-3.45
PSMA5	bta-miR-2285b	-3.45
GK5	bta-miR-2285b	-3.45
TWIST1	bta-miR-2285b	-3.45
LYPLA1	bta-miR-2285b	-3.45
UBXN2B	bta-miR-2285b	-3.45
SPOP	bta-miR-2285b	-3.45
TMEM120B	bta-miR-2285b	-3.45
FEM1A	bta-miR-2285b	-3.45
MAGI3	bta-miR-2285b	-3.45
DEK	bta-miR-2285b	-3.45
RPS6KA3	bta-miR-2285b	-3.45
DDX20	bta-miR-2285b	-3.45
ASF1A	bta-miR-2285b	-3.45
MMADHC	bta-miR-2285b	-3.45
ATP13A3	bta-miR-2285b	-3.45
TBX18	bta-miR-2285b	-3.45
SLC2A8	bta-miR-2285b	-3.45
TTC28	bta-miR-2285b	-3.45
SNX2	bta-miR-2285b	-3.45
ZNF207	bta-miR-2285b	-3.45
ZNF507	bta-miR-2285b	-3.45
MRPL18	bta-miR-2285b	-3.45
PIK3CA	bta-miR-2285b	-3.45
PHKA2	bta-miR-2285b	-3.45
SERINC3	bta-miR-2285b	-3.45
MAD2L1	bta-miR-2285b	-3.45
ZNF384	bta-miR-2285b	-3.45
NOTCH1	bta-miR-2285b	-3.45
CLPB	bta-miR-2285b	-3.45
AGTPBP1	bta-miR-2285b	-3.45
IFNAR1	bta-miR-2285b	-3.45
LRRC47	bta-miR-2285b	-3.45
UACA	bta-miR-2285b	-3.45
FMN1	bta-miR-2285b	-3.45
RNF115	bta-miR-2285b	-3.45
LRCH3	bta-miR-2285b	-3.45
RAB3IP	bta-miR-2285b	-3.45
MGAT4A	bta-miR-2285b	-3.45
SDC3	bta-miR-2285b	-3.45
DNMT3A	bta-miR-2285b	-3.45
NOL6	bta-miR-2285b	-3.45
CCDC41	bta-miR-2285b	-3.45
FMNL3	bta-miR-2285b	-3.45
BCL2L13	bta-miR-2285b	-3.45
STXBP5	bta-miR-2285b	-3.45
RAB3C	bta-miR-2285b	-3.45
ABCB1	bta-miR-2285b	-3.45
SLC11A2	bta-miR-2285b	-3.45
SHROOM3	bta-miR-2285b	-3.45
AKAP12	bta-miR-2285b	-3.45
SNRPD1	bta-miR-2285b	-3.45
ATP6V1D	bta-miR-2285b	-3.45
DEPDC1	bta-miR-2285b	-3.45
RPGRIP1L	bta-miR-2285b	-3.45
MFAP5	bta-miR-2285b	-3.45
TMEM200C	bta-miR-2285b	-3.45
SLC35B3	bta-miR-2285b	-3.45
FUBP1	bta-miR-2285b	-3.45
ATP6V0E1	bta-miR-2285b	-3.45
REV1	bta-miR-2285b	-3.45
DDX18	bta-miR-2285b	-3.45
BPTF	bta-miR-2285b	-3.45
NGRN	bta-miR-2285b	-3.45
PAWR	bta-miR-2285b	-3.45
CRYZ	bta-miR-2285b	-3.45
PHLDA1	bta-miR-2285b	-3.45
STIM2	bta-miR-2285b	-3.45
BRIX1	bta-miR-2285b	-3.45
MMAB	bta-miR-2285b	-3.45
GATAD2B	bta-miR-2285b	-3.45
SNCA	bta-miR-2285b	-3.45
DNAJB5	bta-miR-2285b	-3.45
FAM114A1	bta-miR-2285b	-3.45
SHC1	bta-miR-2285b	-3.45
OPTN	bta-miR-2285b	-3.45
TMEM180	bta-miR-2285b	-3.45
DLD	bta-miR-2285b	-3.45
WDR26	bta-miR-2285b	-3.45
EIF5B	bta-miR-2285b	-3.45
SRD5A3	bta-miR-2285b	-3.45
BZW1	bta-miR-2285b	-3.45
RNF170	bta-miR-2285b	-3.45
TMEM106B	bta-miR-2285b	-3.45
CENPL	bta-miR-2285b	-3.45
MR1	bta-miR-2285b	-3.45
URB2	bta-miR-2285b	-3.45
TMEM194B	bta-miR-2285b	-3.45
TSFM	bta-miR-2285b	-3.45
HOMER1	bta-miR-2285b	-3.45
ZNF226	bta-miR-2285b	-3.45
TADA2A	bta-miR-2285b	-3.45
DNAL1	bta-miR-2285b	-3.45
HNRNPU	bta-miR-2285b	-3.45
CEP68	bta-miR-2285b	-3.45
MTMR3	bta-miR-2285b	-3.45
RIF1	bta-miR-2285b	-3.45
TRIO	bta-miR-2285b	-3.45
TTC33	bta-miR-2285b	-3.45
STAM2	bta-miR-2285b	-3.45
NMT2	bta-miR-2285b	-3.45
DYNLL2	bta-miR-2285b	-3.45
TBC1D24	bta-miR-2285b	-3.45
ARFGEF1	bta-miR-2285b	-3.45
VPS33A	bta-miR-2285b	-3.45
MSRB3	bta-miR-2285b	-3.45
AQR	bta-miR-2285b	-3.45
SSBP2	bta-miR-2285b	-3.45
TLN2	bta-miR-2285b	-3.45
ZNF180	bta-miR-2285b	-3.45
SHFM1	bta-miR-2285b	-3.45
TBC1D4	bta-miR-2285b	-3.45
PTPN4	bta-miR-2285b	-3.45
ABCG8	bta-miR-2285b	-3.45
MPDZ	bta-miR-2285b	-3.45
SPOCK2	bta-miR-2285b	-3.45
HNRNPK	bta-miR-2285b	-3.45
TC2N	bta-miR-2285b	-3.45
LPHN3	bta-miR-2285b	-3.45
RNF24	bta-miR-2285b	-3.45
ZNHIT6	bta-miR-2285b	-3.45
CHIC1	bta-miR-2285b	-3.45
OPA3	bta-miR-2285b	-3.45
TTC30A	bta-miR-2285b	-3.45
TFDP2	bta-miR-2285b	-3.45
PPIP5K2	bta-miR-2285b	-3.45
MSH5	bta-miR-2285b	-3.45
ZFYVE16	bta-miR-2285b	-3.45
ETV5	bta-miR-2285b	-3.45
GCA	bta-miR-2285b	-3.45
SLC43A2	bta-miR-2285b	-3.45
KPNA3	bta-miR-2285b	-3.45
CLDN1	bta-miR-2285b	-3.45
SH3GLB1	bta-miR-2285b	-3.45
HAT1	bta-miR-2285b	-3.45
SIKE1	bta-miR-2285b	-3.45
TIFA	bta-miR-2285b	-3.45
SOS1	bta-miR-2285b	-3.45
NUB1	bta-miR-2285b	-3.45
WAC	bta-miR-2285b	-3.45
SCARB2	bta-miR-2285b	-3.45
APLF	bta-miR-2285b	-3.45
WDR53	bta-miR-2285b	-3.45
VLDLR	bta-miR-2285b	-3.45
RFC5	bta-miR-2285b	-3.45
IWS1	bta-miR-2285b	-3.45
PRIM1	bta-miR-2285b	-3.45
NENF	bta-miR-2285b	-3.45
PSMF1	bta-miR-2285b	-3.45
TXNL1	bta-miR-2285b	-3.45
PKNOX1	bta-miR-2285b	-3.45
PTDSS1	bta-miR-2285b	-3.45
DICER1	bta-miR-2285b	-3.45
NUPL2	bta-miR-2285b	-3.45
ZFYVE26	bta-miR-2285b	-3.45
CENPF	bta-miR-2285b	-3.45
CSNK2A1	bta-miR-2285b	-3.45
TIAL1	bta-miR-2285b	-3.45
ZNF566	bta-miR-2285b	-3.45
GLG1	bta-miR-2285b	-3.45
NDUFAF3	bta-miR-2285b	-3.45
RMND5A	bta-miR-2285b	-3.45
HNRNPA0	bta-miR-2285b	-3.45
SLC31A1	bta-miR-2285b	-3.45
RPRD2	bta-miR-2285b	-3.45
PDCD6IP	bta-miR-2285b	-3.45
PLEKHG1	bta-miR-2285b	-3.45
ACAD8	bta-miR-2285b	-3.45
MRPL45	bta-miR-2285b	-3.45
PPP2R2B	bta-miR-2285b	-3.45
CHDH	bta-miR-2285b	-3.45
NADK	bta-miR-2285b	-3.45
SRFBP1	bta-miR-2285b	-3.45
SFT2D2	bta-miR-2285b	-3.45
CHAF1B	bta-miR-2285b	-3.45
PELO	bta-miR-2285b	-3.45
STT3A	bta-miR-2285b	-3.45
SRM	bta-miR-2285b	-3.45
GPRC5A	bta-miR-2285b	-3.45
APC	bta-miR-2285b	-3.45
ZNF277	bta-miR-2285b	-3.45
ANKRD32	bta-miR-2285b	-3.45
SMYD2	bta-miR-2285b	-3.45
GFI1	bta-miR-2285b	-3.45
TMEM231	bta-miR-2285b	-3.45
ZNF326	bta-miR-2285b	-3.45
NT5C2	bta-miR-2285b	-3.45
MTERFD2	bta-miR-2285b	-3.45
TMED7	bta-miR-2285b	-3.45
ESCO1	bta-miR-2285b	-3.45
UBE2T	bta-miR-2285b	-3.45
IFT74	bta-miR-2285b	-3.45
FAM107B	bta-miR-2285b	-3.45
SEC63	bta-miR-2285b	-3.45
P4HA2	bta-miR-2285b	-3.45
MCOLN2	bta-miR-2285b	-3.45
HNRNPR	bta-miR-2285b	-3.45
RSBN1L	bta-miR-2285b	-3.45
NEK4	bta-miR-2285b	-3.45
DCAF5	bta-miR-2285b	-3.45
MAGIX	bta-miR-2285b	-3.45
DDX19B	bta-miR-2285b	-3.45
SLC25A12	bta-miR-2285b	-3.45
CCDC93	bta-miR-2285b	-3.45
UBA6	bta-miR-2285b	-3.45
OBFC1	bta-miR-2285b	-3.45
FBXO9	bta-miR-2285b	-3.45
SFMBT1	bta-miR-2285b	-3.45
GPR98	bta-miR-2285b	-3.45
BDH1	bta-miR-2285b	-3.45
MYL12B	bta-miR-2285b	-3.45
ARID2	bta-miR-2285b	-3.45
SLC25A24	bta-miR-2285b	-3.45
ACP1	bta-miR-2285b	-3.45
DCUN1D5	bta-miR-2285b	-3.45
ACTR3B	bta-miR-2285b	-3.45
SRI	bta-miR-2285b	-3.45
MIA3	bta-miR-2285b	-3.45
TGIF1	bta-miR-2285b	-3.45
TTC37	bta-miR-2285b	-3.45
ZFYVE9	bta-miR-2285b	-3.45
SIRT3	bta-miR-2285b	-3.45
SOD2	bta-miR-2285b	-3.45
TOMM6	bta-miR-2285b	-3.45
RBM15B	bta-miR-2285b	-3.45
SIPA1L1	bta-miR-2285b	-3.45
LCORL	bta-miR-2285b	-3.45
POP7	bta-miR-2285b	-3.45
REPS1	bta-miR-2285b	-3.45
KDELR1	bta-miR-2285b	-3.45
ACO1	bta-miR-2285b	-3.45
ALG13	bta-miR-2285b	-3.45
ST3GAL6	bta-miR-2285b	-3.45
ZWINT	bta-miR-2285b	-3.45
SP2	bta-miR-2285b	-3.45
RHOF	bta-miR-2285b	-3.45
RPL27A	bta-miR-2285b	-3.45
CNKSR3	bta-miR-2285b	-3.45
NDUFV3	bta-miR-2285b	-3.45
PDE3B	bta-miR-2285b	-3.45
FBXW2	bta-miR-2285b	-3.45
EXOC8	bta-miR-2285b	-3.45
GPBP1	bta-miR-2285b	-3.45
CEP78	bta-miR-2285b	-3.45
NUFIP2	bta-miR-2285b	-3.45
ACOT13	bta-miR-2285b	-3.45
TTF2	bta-miR-2285b	-3.45
YME1L1	bta-miR-2285b	-3.45
SEL1L	bta-miR-2285b	-3.45
SLBP	bta-miR-2285b	-3.45
VANGL1	bta-miR-2285b	-3.45
PTS	bta-miR-2285b	-3.45
TRIP4	bta-miR-2285b	-3.45
NUP155	bta-miR-2285b	-3.45
GCN1L1	bta-miR-2285b	-3.45
AP1S1	bta-miR-2285b	-3.45
DHX40	bta-miR-2285b	-3.45
EIF2B2	bta-miR-2285b	-3.45
COQ7	bta-miR-2285b	-3.45
PRKAR1A	bta-miR-2285b	-3.45
MARCH7	bta-miR-2285b	-3.45
RAB33B	bta-miR-2285b	-3.45
ARHGEF5	bta-miR-2285b	-3.45
CNBP	bta-miR-2285b	-3.45
APTX	bta-miR-2285b	-3.45
CNP	bta-miR-2285b	-3.45
[truncated: 1,420 more rows]

## Sheet: Table S4
Table S4. Dataset of targets expressed in 2-cell embryo of 12vs16 months contrast for IPA
Ortholog of target gene		FC of miRNA
ETNK1	bta-miR-759	4.99
SCGB2A2	bta-miR-759	4.99
AKAP11	bta-miR-759	4.99
CCDC146	bta-miR-759	4.99
TKTL1	bta-miR-759	4.99
SLC35D1	bta-miR-759	4.99
TBCA	bta-miR-759	4.99
PACRGL	bta-miR-759	4.99
FBXL3	bta-miR-759	4.99
ATP5E	bta-miR-759	4.99
ADK	bta-miR-759	4.99
NRXN1	bta-miR-759	4.99
PGRMC2	bta-miR-759	4.99
SS18	bta-miR-759	4.99
GDI2	bta-miR-759	4.99
SLC38A11	bta-miR-759	4.99
ZNF236	bta-miR-759	4.99
PGM2L1	bta-miR-759	4.99
SH3D19	bta-miR-759	4.99
ZNF449	bta-miR-759	4.99
SCYL3	bta-miR-759	4.99
ZNF583	bta-miR-759	4.99
ATAD1	bta-miR-759	4.99
CNGA3	bta-miR-759	4.99
SUB1	bta-miR-759	4.99
DSE	bta-miR-759	4.99
ECD	bta-miR-759	4.99
NCAPG	bta-miR-759	4.99
SCN8A	bta-miR-759	4.99
MAP3K7	bta-miR-759	4.99
CHSY1	bta-miR-759	4.99
RBBP8	bta-miR-759	4.99
SCYL2	bta-miR-759	4.99
ERI2	bta-miR-759	4.99
MTERF	bta-miR-759	4.99
PRPF4	bta-miR-759	4.99
EXOC8	bta-miR-759	4.99
ZCCHC11	bta-miR-759	4.99
RWDD3	bta-miR-759	4.99
SLC35E3	bta-miR-759	4.99
ENSA	bta-miR-759	4.99
PHB2	bta-miR-759	4.99
CITED2	bta-miR-759	4.99
TRIP11	bta-miR-759	4.99
EIF3H	bta-miR-759	4.99
CUL3	bta-miR-759	4.99
PAK1IP1	bta-miR-2284z	4.44
TPMT	bta-miR-2284z	4.44
GINS1	bta-miR-2284z	4.44
ERO1L	bta-miR-2284z	4.44
DCK	bta-miR-2284z	4.44
BARHL2	bta-miR-2284z	4.44
CITED2	bta-miR-2284z	4.44
SEPP1	bta-miR-2284z	4.44
STAM2	bta-miR-2284z	4.44
FPGT	bta-miR-2284z	4.44
HHEX	bta-miR-2284z	4.44
MAP4K5	bta-miR-2284z	4.44
KLHL11	bta-miR-2284z	4.44
PHKB	bta-miR-2284z	4.44
ZNF503	bta-miR-2284z	4.44
TMCO3	bta-miR-2284z	4.44
PSAT1	bta-miR-2284z	4.44
HSPBAP1	bta-miR-2284z	4.44
SNX15	bta-miR-34b	2.14
CUEDC1	bta-miR-34b	2.14
SLC30A3	bta-miR-34b	2.14
GNAO1	bta-miR-34b	2.14
STRN3	bta-miR-34b	2.14
TRANK1	bta-miR-34b	2.14
PREB	bta-miR-34b	2.14
PEA15	bta-miR-34b	2.14
NUMBL	bta-miR-34b	2.14
E2F3	bta-miR-34b	2.14
LMAN1	bta-miR-34b	2.14
POGZ	bta-miR-34b	2.14
ITCH	bta-miR-34b	2.14
PPP1R11	bta-miR-34b	2.14
SOX4	bta-miR-34b	2.14
PIP5K1A	bta-miR-34b	2.14
SLC25A27	bta-miR-34b	2.14
RRAS2	bta-miR-34b	2.14
CSF1R	bta-miR-34b	2.14
RAI14	bta-miR-34b	2.14
TUSC5	bta-miR-34b	2.14
PPM1L	bta-miR-34b	2.14
DAAM1	bta-miR-34b	2.14
ALCAM	bta-miR-34b	2.14
TM9SF3	bta-miR-34b	2.14
MCFD2	bta-miR-34b	2.14
ATP2B4	bta-miR-34b	2.14
ELL2	bta-miR-34b	2.14
CTTNBP2NL	bta-miR-34b	2.14
WTAP	bta-miR-34b	2.14
SDHC	bta-miR-34b	2.14
UBE2G1	bta-miR-34b	2.14
CPEB2	bta-miR-34b	2.14
NCOA1	bta-miR-34b	2.14
NME6	bta-miR-34b	2.14
SEH1L	bta-miR-34b	2.14
SHE	bta-miR-34b	2.14
EPN2	bta-miR-34b	2.14
WAC	bta-miR-34b	2.14
REPS2	bta-miR-34b	2.14
PITPNM2	bta-miR-34b	2.14
ADAT2	bta-miR-34b	2.14
RNF34	bta-miR-34b	2.14
PPFIA1	bta-miR-34b	2.14
MRPL52	bta-miR-34b	2.14
FNDC3B	bta-miR-34b	2.14
PPWD1	bta-miR-34b	2.14
PSPH	bta-miR-2285e	-2.44
KDM1B	bta-miR-2285e	-2.44
CIAPIN1	bta-miR-2285e	-2.44
ZC4H2	bta-miR-2285e	-2.44
IL2RA	bta-miR-2285e	-2.44
ZCCHC17	bta-miR-2285e	-2.44
CCNJ	bta-miR-2285e	-2.44
APPL1	bta-miR-2285e	-2.44
TOR1AIP2	bta-miR-2285e	-2.44
SESN2	bta-miR-2285e	-2.44
YOD1	bta-miR-2285e	-2.44
WDR12	bta-miR-2285e	-2.44
NOL6	bta-miR-2285e	-2.44
ARL8B	bta-miR-2285e	-2.44
PHF12	bta-miR-2285e	-2.44
HELZ	bta-miR-2285e	-2.44
TNPO3	bta-miR-2285e	-2.44
RNF217	bta-miR-2285e	-2.44
TOM1L2	bta-miR-2285e	-2.44
ITPK1	bta-miR-2285e	-2.44
GPR133	bta-miR-2285e	-2.44
TCHP	bta-miR-2285e	-2.44
LONP2	bta-miR-2285e	-2.44
TTF2	bta-miR-2285e	-2.44
RAB3C	bta-miR-2285e	-2.44
UBE2F	bta-miR-2285e	-2.44
MATR3	bta-miR-2285e	-2.44
IFT74	bta-miR-2285e	-2.44
DCUN1D5	bta-miR-2285e	-2.44
TSC22D2	bta-miR-2285e	-2.44
LCOR	bta-miR-302a	-2.38
LMO3	bta-miR-302a	-2.38
FGF16	bta-miR-302a	-2.38
IL6ST	bta-miR-302a	-2.38
EFEMP1	bta-miR-302a	-2.38
CAV2	bta-miR-302a	-2.38
CROT	bta-miR-302a	-2.38
SLC25A6	bta-miR-302a	-2.38
KIF23	bta-miR-302a	-2.38
PICALM	bta-miR-302a	-2.38
CXXC5	bta-miR-302a	-2.38
PNMA2	bta-miR-302a	-2.38
RAP1A	bta-miR-302a	-2.38
MTF1	bta-miR-302a	-2.38
RICTOR	bta-miR-302a	-2.38
GAS2	bta-miR-302a	-2.38
AEBP2	bta-miR-302a	-2.38
UBL3	bta-miR-302a	-2.38
ASH1L	bta-miR-302a	-2.38
RTN1	bta-miR-302a	-2.38
TRERF1	bta-miR-302a	-2.38
HN1	bta-miR-302a	-2.38
NHLRC2	bta-miR-302a	-2.38
CFL2	bta-miR-302a	-2.38
PKN2	bta-miR-302a	-2.38
STX11	bta-miR-302a	-2.38
DERL2	bta-miR-302a	-2.38
MCL1	bta-miR-302a	-2.38
MYCBP	bta-miR-302a	-2.38
MARCH5	bta-miR-302a	-2.38
SAR1B	bta-miR-302a	-2.38
RALGPS2	bta-miR-302a	-2.38
ARID4B	bta-miR-302a	-2.38
ARHGEF3	bta-miR-302a	-2.38
TSEN34	bta-miR-302a	-2.38
WDR26	bta-miR-302a	-2.38
MEF2C	bta-miR-302a	-2.38
VLDLR	bta-miR-302a	-2.38
SSX2IP	bta-miR-302a	-2.38
PBX3	bta-miR-302a	-2.38
TOM1L2	bta-miR-302a	-2.38
PIGM	bta-miR-302a	-2.38
PRC1	bta-miR-302a	-2.38
FBN1	bta-miR-302a	-2.38
ZNF800	bta-miR-302a	-2.38
ZZZ3	bta-miR-302a	-2.38
KLF4	bta-miR-302a	-2.38
TNFAIP1	bta-miR-302a	-2.38
UBXN1	bta-miR-302a	-2.38
RPS6KA3	bta-miR-302a	-2.38
MKNK2	bta-miR-302a	-2.38
CENPF	bta-miR-302a	-2.38
PRDM8	bta-miR-302a	-2.38
DNAJA2	bta-miR-302a	-2.38
ARF6	bta-miR-302a	-2.38
BRI3	bta-miR-302a	-2.38
SSR1	bta-miR-302a	-2.38
CDK19	bta-miR-302a	-2.38
CDCA7	bta-miR-302a	-2.38
PRDM4	bta-miR-302a	-2.38
UNK	bta-miR-302a	-2.38
OSTM1	bta-miR-302a	-2.38
UBE2Q2	bta-miR-302a	-2.38
POLK	bta-miR-302a	-2.38
UBE2N	bta-miR-302a	-2.38
UHMK1	bta-miR-302a	-2.38
YOD1	bta-miR-302a	-2.38
JAK1	bta-miR-302a	-2.38
ANKRD52	bta-miR-302a	-2.38
SEPHS1	bta-miR-302a	-2.38
SLC25A40	bta-miR-302a	-2.38
INTS6	bta-miR-302a	-2.38
LGR4	bta-miR-302a	-2.38
KDELR3	bta-miR-302a	-2.38
FAM122A	bta-miR-302a	-2.38
H2AFY	bta-miR-302a	-2.38
ZBTB43	bta-miR-302a	-2.38
TRPV6	bta-miR-302a	-2.38
CACNG3	bta-miR-302a	-2.38
ORMDL3	bta-miR-302a	-2.38
SPRED1	bta-miR-302a	-2.38
CRTC2	bta-miR-302a	-2.38
GDF11	bta-miR-302a	-2.38
PSEN1	bta-miR-302a	-2.38
SPOPL	bta-miR-302a	-2.38
PDCD4	bta-miR-302a	-2.38
RNF6	bta-miR-302a	-2.38
CNOT2	bta-miR-302a	-2.38
SYNJ2BP	bta-miR-302a	-2.38
TIPARP	bta-miR-302a	-2.38
PIP4K2A	bta-miR-302a	-2.38
KDM1B	bta-miR-302a	-2.38
SS18L1	bta-miR-302a	-2.38
MFAP1	bta-miR-302a	-2.38
WDR37	bta-miR-302a	-2.38
CDC25B	bta-miR-302a	-2.38
RAB22A	bta-miR-302a	-2.38
ATF2	bta-miR-302a	-2.38
RC3H1	bta-miR-302a	-2.38
RSF1	bta-miR-302a	-2.38
DGKB	bta-miR-302a	-2.38
RSBN1L	bta-miR-302a	-2.38
TOR1B	bta-miR-302a	-2.38
PLLP	bta-miR-302a	-2.38
RFX7	bta-miR-302a	-2.38
USP46	bta-miR-302a	-2.38
FGD4	bta-miR-302a	-2.38
SMARCC2	bta-miR-302a	-2.38
PIK3CA	bta-miR-302a	-2.38
STXBP1	bta-miR-302a	-2.38
SNX12	bta-miR-302a	-2.38
SOX5	bta-miR-302a	-2.38
STIL	bta-miR-302a	-2.38
ZDHHC3	bta-miR-302a	-2.38
CSGALNACT2	bta-miR-302a	-2.38
MBNL1	bta-miR-302a	-2.38
WASL	bta-miR-302a	-2.38
ASF1B	bta-miR-302a	-2.38
TSHZ3	bta-miR-302a	-2.38
ETV1	bta-miR-302a	-2.38
GNS	bta-miR-302a	-2.38
YTHDF3	bta-miR-302a	-2.38
DENND5B	bta-miR-302a	-2.38
MAL2	bta-miR-302a	-2.38
CAMSAP1	bta-miR-302a	-2.38
CALM1	bta-miR-302a	-2.38
RTKN2	bta-miR-302a	-2.38
TRPS1	bta-miR-302a	-2.38
FNDC3A	bta-miR-302a	-2.38
ELK4	bta-miR-302a	-2.38
CDC23	bta-miR-302a	-2.38
FBXL4	bta-miR-302a	-2.38
SEPT2	bta-miR-302a	-2.38
SESN3	bta-miR-302a	-2.38
MFN2	bta-miR-302a	-2.38
PAK3	bta-miR-302a	-2.38
USP6NL	bta-miR-302a	-2.38
INHBA	bta-miR-302a	-2.38
GXYLT1	bta-miR-302a	-2.38
GRHL2	bta-miR-302a	-2.38
MYO1D	bta-miR-302a	-2.38
ZNF436	bta-miR-302a	-2.38
CC2D1A	bta-miR-302a	-2.38
SNX21	bta-miR-302a	-2.38
MTMR3	bta-miR-302a	-2.38
FBXW11	bta-miR-302a	-2.38
DSTYK	bta-miR-302a	-2.38
PDHX	bta-miR-302a	-2.38
NIP7	bta-miR-302a	-2.38
GMEB1	bta-miR-302a	-2.38
RGL1	bta-miR-302a	-2.38
MTUS1	bta-miR-302a	-2.38
CDKN1B	bta-miR-302a	-2.38
CLIP4	bta-miR-302a	-2.38
FRMD4B	bta-miR-302a	-2.38
CDK5R1	bta-miR-302a	-2.38
AP3M1	bta-miR-302a	-2.38
FNBP1L	bta-miR-302a	-2.38
HOOK3	bta-miR-302a	-2.38
ZNF462	bta-miR-302a	-2.38
MIER1	bta-miR-302a	-2.38
MRS2	bta-miR-302a	-2.38
TNRC6B	bta-miR-302a	-2.38
PTPN4	bta-miR-302a	-2.38
DNAJC13	bta-miR-302a	-2.38
KIF3B	bta-miR-302a	-2.38
PDE3A	bta-miR-302a	-2.38
JAZF1	bta-miR-302a	-2.38
RAPGEFL1	bta-miR-302a	-2.38
ATXN1	bta-miR-302a	-2.38
FBXO30	bta-miR-302a	-2.38
RPRD2	bta-miR-302a	-2.38
HS2ST1	bta-miR-302a	-2.38
DHX40	bta-miR-302a	-2.38
ACTN4	bta-miR-302a	-2.38
SOCS5	bta-miR-302a	-2.38
FMNL3	bta-miR-302a	-2.38
HCN4	bta-miR-302a	-2.38
ZMYND11	bta-miR-302a	-2.38
POLE3	bta-miR-302a	-2.38
ASCC1	bta-miR-302a	-2.38
SNTB2	bta-miR-302a	-2.38
NR2C2	bta-miR-302a	-2.38
RB1CC1	bta-miR-302a	-2.38
ZNFX1	bta-miR-302a	-2.38
NEK9	bta-miR-302a	-2.38
TMEM168	bta-miR-302a	-2.38
MAST3	bta-miR-302a	-2.38
PTPRT	bta-miR-302a	-2.38
SYAP1	bta-miR-302a	-2.38
PHC3	bta-miR-302a	-2.38
BMPR2	bta-miR-302a	-2.38
ENTPD7	bta-miR-302a	-2.38
GAB2	bta-miR-302a	-2.38
TNRC6A	bta-miR-302a	-2.38
TMEM87A	bta-miR-302a	-2.38
TTF2	bta-miR-302a	-2.38
TBCEL	bta-miR-302a	-2.38
NKRF	bta-miR-302a	-2.38
ARF1	bta-miR-302a	-2.38
NFIA	bta-miR-302a	-2.38
HCFC2	bta-miR-302a	-2.38
SP1	bta-miR-302a	-2.38
WAPAL	bta-miR-302a	-2.38
ZKSCAN1	bta-miR-302a	-2.38
GPR137C	bta-miR-302a	-2.38
ACBD5	bta-miR-302a	-2.38
LETMD1	bta-miR-302a	-2.38
NCOA3	bta-miR-302a	-2.38
NAPEPLD	bta-miR-302a	-2.38
ATXN7	bta-miR-302a	-2.38
UBR3	bta-miR-302a	-2.38
EPB41L5	bta-miR-302a	-2.38
TARDBP	bta-miR-302a	-2.38
RABEP1	bta-miR-302a	-2.38
DCP1A	bta-miR-302a	-2.38
ZNF618	bta-miR-302a	-2.38
CDC25A	bta-miR-302a	-2.38
CUX2	bta-miR-302a	-2.38
PLXNC1	bta-miR-302a	-2.38
ASAP2	bta-miR-302a	-2.38
RBPJ	bta-miR-302a	-2.38
TET2	bta-miR-302a	-2.38
CREB3L2	bta-miR-302a	-2.38
APTX	bta-miR-302a	-2.38
RIMKLA	bta-miR-302a	-2.38
SUV420H1	bta-miR-302a	-2.38
APBB2	bta-miR-302a	-2.38
UBE2B	bta-miR-302a	-2.38
KPNA1	bta-miR-302a	-2.38
CBL	bta-miR-302a	-2.38
CLSPN	bta-miR-302a	-2.38
PON2	bta-miR-302a	-2.38
AAK1	bta-miR-302a	-2.38
UBASH3B	bta-miR-302a	-2.38
USP42	bta-miR-302a	-2.38
PTPMT1	bta-miR-302a	-2.38
ROCK2	bta-miR-302a	-2.38
EDC3	bta-miR-302a	-2.38
ZRANB1	bta-miR-302a	-2.38
BRWD1	bta-miR-302a	-2.38
NR2C1	bta-miR-302a	-2.38
BEND3	bta-miR-302a	-2.38
RAB10	bta-miR-302a	-2.38
SLC17A7	bta-miR-302a	-2.38
PCGF5	bta-miR-302a	-2.38
DDX3X	bta-miR-302a	-2.38
ZFR	bta-miR-302a	-2.38
SUZ12	bta-miR-302a	-2.38
MECP2	bta-miR-302a	-2.38
POMGNT1	bta-miR-302a	-2.38
AKT3	bta-miR-302a	-2.38
MARK1	bta-miR-302a	-2.38
PXMP4	bta-miR-302a	-2.38
SMARCE1	bta-miR-302a	-2.38
ARMC8	bta-miR-302a	-2.38
TBL1XR1	bta-miR-302a	-2.38
ATXN3	bta-miR-302a	-2.38
ACADSB	bta-miR-302a	-2.38
VPS13B	bta-miR-302a	-2.38
TGFBR2	bta-miR-302a	-2.38
HNRNPA2B1	bta-miR-302a	-2.38
KDELR2	bta-miR-302a	-2.38
TNRC6C	bta-miR-302a	-2.38
INSIG2	bta-miR-302a	-2.38
MYO18A	bta-miR-302a	-2.38
ASF1A	bta-miR-302a	-2.38
ALG9	bta-miR-302a	-2.38
EIF2S1	bta-miR-302a	-2.38
ARID1B	bta-miR-302a	-2.38
NOL7	bta-miR-302a	-2.38
GATAD2B	bta-miR-302a	-2.38
PSMB5	bta-miR-302a	-2.38
ZNF292	bta-miR-302a	-2.38
RAB11A	bta-miR-302a	-2.38
NDST1	bta-miR-302a	-2.38
ADD1	bta-miR-302a	-2.38
DST	bta-miR-302a	-2.38
SQSTM1	bta-miR-302a	-2.38
PLEKHA3	bta-miR-302a	-2.38
SRI	bta-miR-302a	-2.38
EIF5A2	bta-miR-302a	-2.38
MFN1	bta-miR-302a	-2.38
MED13	bta-miR-302a	-2.38
EIF5B	bta-miR-302a	-2.38
AGPS	bta-miR-302a	-2.38
LUC7L2	bta-miR-302a	-2.38
NSUN3	bta-miR-302a	-2.38
RSRC2	bta-miR-302a	-2.38
SNX9	bta-miR-302a	-2.38
APP	bta-miR-302a	-2.38
IAH1	bta-miR-302a	-2.38
PPIP5K2	bta-miR-302a	-2.38
ACOT13	bta-miR-302a	-2.38
BNC2	bta-miR-302a	-2.38
STK16	bta-miR-302a	-2.38
DCUN1D5	bta-miR-302a	-2.38
GLUL	bta-miR-302a	-2.38
RBMS2	bta-miR-302a	-2.38
MICALL1	bta-miR-302a	-2.38
TTR	bta-miR-302a	-2.38
NFE2L1	bta-miR-302a	-2.38
SEMA4F	bta-miR-302a	-2.38
PTPRF	bta-miR-302a	-2.38
TAOK1	bta-miR-302a	-2.38
MTFR1	bta-miR-2334	-4.35
DMAP1	bta-miR-2334	-4.35
MTPN	bta-miR-2334	-4.35
WDR83	bta-miR-2334	-4.35
TRMT112	bta-miR-2334	-4.35
BCL2L2	bta-miR-2334	-4.35
DOLPP1	bta-miR-2334	-4.35
TFAP2D	bta-miR-2334	-4.35
UBE2V1	bta-miR-2334	-4.35
GCLC	bta-miR-2334	-4.35
WBSCR22	bta-miR-2334	-4.35
FKBP6	bta-miR-2334	-4.35
TARBP1	bta-miR-2334	-4.35
UFC1	bta-miR-2334	-4.35
THYN1	bta-miR-2334	-4.35
SMO	bta-miR-2334	-4.35
KLK4	bta-miR-2334	-4.35
NOTCH2	bta-miR-2334	-4.35
TMEM33	bta-miR-2334	-4.35
GSTCD	bta-miR-2334	-4.35
RBM23	bta-miR-2334	-4.35
SCOC	bta-miR-2334	-4.35
TRIAP1	bta-miR-2334	-4.35
PDE4DIP	bta-miR-2334	-4.35
CABLES2	bta-miR-2334	-4.35
RP9	bta-miR-2334	-4.35
PERP	bta-miR-2334	-4.35
KIAA1737	bta-miR-2334	-4.35
CYFIP1	bta-miR-2334	-4.35
VAPB	bta-miR-2334	-4.35
BET1L	bta-miR-2334	-4.35
WIBG	bta-miR-2334	-4.35
TLN1	bta-miR-2334	-4.35
EXOC3L2	bta-miR-2334	-4.35
YWHAQ	bta-miR-2334	-4.35
BCL7B	bta-miR-2334	-4.35
TMEM221	bta-miR-2334	-4.35
UBFD1	bta-miR-2334	-4.35
TMEM189-UBE2V1	bta-miR-2334	-4.35
TMIE	bta-miR-2334	-4.35
CCNYL1	bta-miR-2334	-4.35
TMEM189	bta-miR-2334	-4.35
CCNF	bta-miR-2334	-4.35
INSR	bta-miR-2334	-4.35
TSC22D1	bta-miR-2334	-4.35
TK2	bta-miR-2334	-4.35
MIPOL1	bta-miR-2334	-4.35
NFS1	bta-miR-2334	-4.35
SCN4B	bta-miR-2334	-4.35
ALOX12	bta-miR-2334	-4.35
TMEM27	bta-miR-2334	-4.35
MT1E	bta-miR-2334	-4.35
YWHAH	bta-miR-2334	-4.35
PROSC	bta-miR-2334	-4.35
KCNK12	bta-miR-2334	-4.35
NBR1	bta-miR-2334	-4.35
RGL1	bta-miR-2334	-4.35
GPR68	bta-miR-2334	-4.35
NPTN	bta-miR-2334	-4.35
ARMC7	bta-miR-2334	-4.35
TMEM97	bta-miR-2334	-4.35
RNF111	bta-miR-2334	-4.35
NDUFA11	bta-miR-2334	-4.35
EIF4E1B	bta-miR-2334	-4.35
STOML1	bta-miR-2334	-4.35
UBE2Z	bta-miR-2334	-4.35
SSFA2	bta-miR-2334	-4.35
MAPK8	bta-miR-2334	-4.35
PAICS	bta-miR-2334	-4.35
STK19	bta-miR-2334	-4.35
KATNB1	bta-miR-2334	-4.35
GINS3	bta-miR-2334	-4.35
STT3B	bta-miR-2334	-4.35
KITLG	bta-miR-2334	-4.35
FKBP1B	bta-miR-2334	-4.35
AMMECR1L	bta-miR-2334	-4.35
MIF4GD	bta-miR-2334	-4.35
DCTN5	bta-miR-2334	-4.35
CNIH3	bta-miR-2334	-4.35
AP3D1	bta-miR-2334	-4.35
ARMC10	bta-miR-2334	-4.35
NR1H3	bta-miR-2334	-4.35
FKBP1A	bta-miR-2334	-4.35
ZNF575	bta-miR-2334	-4.35
TMEM167A	bta-miR-2334	-4.35
UNC119B	bta-miR-2334	-4.35
USP19	bta-miR-2334	-4.35
USP20	bta-miR-2334	-4.35
MTHFD1	bta-miR-2334	-4.35
TTC4	bta-miR-2334	-4.35
PDK3	bta-miR-2334	-4.35
SLC35E1	bta-miR-2334	-4.35
SMYD4	bta-miR-2334	-4.35
SESN1	bta-miR-2334	-4.35
RTF1	bta-miR-2334	-4.35
CLDN2	bta-miR-2334	-4.35
SLC25A22	bta-miR-2334	-4.35
LCOR	bta-miR-2334	-4.35
SIRT3	bta-miR-2334	-4.35
EEA1	bta-miR-2334	-4.35
SHOC2	bta-miR-2334	-4.35
WDR82	bta-miR-2334	-4.35
MAP4K2	bta-miR-2334	-4.35
ARCN1	bta-miR-2334	-4.35
EFHD1	bta-miR-2334	-4.35
RFWD2	bta-miR-2334	-4.35
GAN	bta-miR-2334	-4.35
ZNF81	bta-miR-2334	-4.35
CHAC1	bta-miR-2334	-4.35
RNF24	bta-miR-2334	-4.35
PCID2	bta-miR-2334	-4.35
SLC10A7	bta-miR-2334	-4.35
EGLN3	bta-miR-2334	-4.35
UCK1	bta-miR-2334	-4.35
CMPK1	bta-miR-2334	-4.35
PHLPP2	bta-miR-2334	-4.35
ACOX1	bta-miR-2334	-4.35
EDF1	bta-miR-2334	-4.35
COL4A3BP	bta-miR-2334	-4.35
MAP7D2	bta-miR-2334	-4.35
ITPRIPL1	bta-miR-2334	-4.35
ZNF784	bta-miR-2334	-4.35
ARL2	bta-miR-2334	-4.35
SSR1	bta-miR-2334	-4.35
MPDU1	bta-miR-2334	-4.35
RUNDC3B	bta-miR-2334	-4.35
AP2A1	bta-miR-2334	-4.35
COX7C	bta-miR-2334	-4.35
SNX21	bta-miR-2334	-4.35
PID1	bta-miR-2334	-4.35
AURKA	bta-miR-2334	-4.35
CACNA2D1	bta-miR-2334	-4.35
AKIRIN1	bta-miR-2334	-4.35
GADD45G	bta-miR-2334	-4.35
PGM1	bta-miR-2334	-4.35
WWP2	bta-miR-2334	-4.35
NUDCD3	bta-miR-2334	-4.35
RPUSD1	bta-miR-2334	-4.35
MMS19	bta-miR-2334	-4.35
CALU	bta-miR-2334	-4.35
RAB40C	bta-miR-2334	-4.35
ALX1	bta-miR-2334	-4.35
CHPT1	bta-miR-2334	-4.35
SIX5	bta-miR-2334	-4.35
PABPC1L	bta-miR-2334	-4.35
UBTD1	bta-miR-2334	-4.35
LMAN2	bta-miR-2334	-4.35
ABHD10	bta-miR-2334	-4.35
ATF2	bta-miR-2334	-4.35
SLC31A2	bta-miR-2334	-4.35
GCC2	bta-miR-2334	-4.35
FBXO32	bta-miR-2334	-4.35
TBK1	bta-miR-2334	-4.35
ANKRD31	bta-miR-2334	-4.35
EFR3B	bta-miR-2334	-4.35
ARFGAP2	bta-miR-2334	-4.35
FBXW4	bta-miR-2334	-4.35
FAM60A	bta-miR-2334	-4.35
PPP1R12A	bta-miR-2334	-4.35
TXN2	bta-miR-2334	-4.35
CDC23	bta-miR-2334	-4.35
RELN	bta-miR-2334	-4.35
MTMR4	bta-miR-2334	-4.35
TRIB1	bta-miR-2334	-4.35
SPRYD3	bta-miR-2334	-4.35
ANKRD13D	bta-miR-2334	-4.35
HDAC8	bta-miR-2334	-4.35
UGT3A2	bta-miR-2334	-4.35
CPOX	bta-miR-2334	-4.35
FOXO1	bta-miR-2334	-4.35
UBE2J2	bta-miR-2334	-4.35
B4GALT1	bta-miR-2334	-4.35
DDX28	bta-miR-2334	-4.35
TPPP3	bta-miR-2334	-4.35
NLRC5	bta-miR-2334	-4.35
TGFBRAP1	bta-miR-2334	-4.35
SMAD3	bta-miR-2334	-4.35
TPM3	bta-miR-2334	-4.35
CNNM3	bta-miR-2334	-4.35
TOM1L2	bta-miR-2334	-4.35
RPS6KA3	bta-miR-2334	-4.35
GDPD1	bta-miR-2334	-4.35
VWCE	bta-miR-2334	-4.35
MADD	bta-miR-2334	-4.35
RAB37	bta-miR-2334	-4.35
ZNF341	bta-miR-2334	-4.35
DGCR6L	bta-miR-2334	-4.35
SRP72	bta-miR-2334	-4.35
RAB12	bta-miR-2334	-4.35
AKAP12	bta-miR-2334	-4.35
YRDC	bta-miR-2334	-4.35
PBX3	bta-miR-2334	-4.35
FMN1	bta-miR-2334	-4.35
MARCH5	bta-miR-2334	-4.35
RNF10	bta-miR-2334	-4.35
NFKB1	bta-miR-2334	-4.35
CHPF	bta-miR-2334	-4.35
KRT78	bta-miR-2334	-4.35
C1orf174	bta-miR-2334	-4.35
ELL	bta-miR-2334	-4.35
METTL13	bta-miR-2334	-4.35
FAM73B	bta-miR-2334	-4.35
ZNF346	bta-miR-2334	-4.35
NRBP1	bta-miR-2334	-4.35
UCP2	bta-miR-2334	-4.35
ARHGAP5	bta-miR-2334	-4.35
FOSL2	bta-miR-2334	-4.35
TRADD	bta-miR-2334	-4.35
PAFAH1B2	bta-miR-2334	-4.35
TBC1D9B	bta-miR-2334	-4.35
CACNG5	bta-miR-2334	-4.35
PLEKHA3	bta-miR-2334	-4.35
VTI1B	bta-miR-2334	-4.35
GPS1	bta-miR-2334	-4.35
DMPK	bta-miR-2334	-4.35
STS	bta-miR-2334	-4.35
SOS2	bta-miR-2334	-4.35
RPAP1	bta-miR-2334	-4.35
PPP2R1A	bta-miR-2334	-4.35
ZAR1	bta-miR-2334	-4.35
IQGAP3	bta-miR-2334	-4.35
NRIP1	bta-miR-2334	-4.35
SOAT1	bta-miR-2334	-4.35
CINP	bta-miR-2334	-4.35
LRRC17	bta-miR-2334	-4.35
LAGE3	bta-miR-2334	-4.35
PTPLAD1	bta-miR-2334	-4.35
ELOVL5	bta-miR-2334	-4.35
BCL2L13	bta-miR-2334	-4.35
SLC12A6	bta-miR-2334	-4.35
CD300LF	bta-miR-2334	-4.35
ZMYM2	bta-miR-2334	-4.35
UBAC2	bta-miR-2334	-4.35
TPK1	bta-miR-2334	-4.35
SLC17A3	bta-miR-2334	-4.35
SGSH	bta-miR-2334	-4.35
KRT85	bta-miR-2334	-4.35
REXO1	bta-miR-2334	-4.35
YEATS2	bta-miR-2334	-4.35
GATAD2A	bta-miR-2334	-4.35
PER1	bta-miR-2334	-4.35
TBC1D13	bta-miR-2334	-4.35
MX2	bta-miR-2334	-4.35
PWP2	bta-miR-2334	-4.35
PISD	bta-miR-2334	-4.35
MRS2	bta-miR-2334	-4.35
OLAH	bta-miR-2334	-4.35
RAB9A	bta-miR-2334	-4.35
MAF1	bta-miR-2334	-4.35
CDC25B	bta-miR-2334	-4.35
KIF3B	bta-miR-2334	-4.35
IFFO2	bta-miR-2334	-4.35
TMC7	bta-miR-2334	-4.35
MTOR	bta-miR-2334	-4.35
LATS2	bta-miR-2334	-4.35
EXT2	bta-miR-2334	-4.35
GPD1	bta-miR-2334	-4.35
PTTG1IP	bta-miR-2334	-4.35
ASAP1	bta-miR-2334	-4.35
NECAP1	bta-miR-2334	-4.35
SF3B4	bta-miR-2334	-4.35
VMA21	bta-miR-2334	-4.35
WAPAL	bta-miR-2334	-4.35
PAX8	bta-miR-2334	-4.35
LPIN2	bta-miR-2334	-4.35
TIFAB	bta-miR-2334	-4.35
SH2D2A	bta-miR-2334	-4.35
MIOS	bta-miR-2334	-4.35
TACSTD2	bta-miR-2334	-4.35
CTDSP2	bta-miR-2334	-4.35
TMEM126B	bta-miR-2334	-4.35
TLK1	bta-miR-2334	-4.35
CYP3A5	bta-miR-2334	-4.35
PCBD1	bta-miR-2334	-4.35
HKDC1	bta-miR-2334	-4.35
ADRB2	bta-miR-2334	-4.35
LNP1	bta-miR-2334	-4.35
DTX3	bta-miR-2334	-4.35
ESRRG	bta-miR-2334	-4.35
PBXIP1	bta-miR-2334	-4.35
TTC1	bta-miR-2334	-4.35
CD44	bta-miR-2334	-4.35
ZNF691	bta-miR-2334	-4.35
MFN2	bta-miR-2334	-4.35
WDTC1	bta-miR-2334	-4.35
KIF5A	bta-miR-2334	-4.35
CDK4	bta-miR-2334	-4.35
COPS2	bta-miR-2334	-4.35
GATA4	bta-miR-2334	-4.35
KLHL9	bta-miR-2334	-4.35
PPM1H	bta-miR-2334	-4.35
PIKFYVE	bta-miR-2334	-4.35
SLC46A1	bta-miR-2334	-4.35
ZNF829	bta-miR-2334	-4.35
ACAA1	bta-miR-2334	-4.35
COL24A1	bta-miR-2334	-4.35
CACNB1	bta-miR-2334	-4.35
PIGT	bta-miR-2334	-4.35
RAB11FIP2	bta-miR-2334	-4.35
SLC39A13	bta-miR-2334	-4.35
RAB4B	bta-miR-2334	-4.35
VPS18	bta-miR-2334	-4.35
STK11	bta-miR-2334	-4.35
OGFOD1	bta-miR-2334	-4.35
TASP1	bta-miR-2334	-4.35
DYDC1	bta-miR-2334	-4.35
MAN2A1	bta-miR-2334	-4.35
UTP6	bta-miR-2334	-4.35
NF1	bta-miR-2334	-4.35
RASSF5	bta-miR-2334	-4.35
EMILIN2	bta-miR-2334	-4.35
TMBIM4	bta-miR-2334	-4.35
RCSD1	bta-miR-2334	-4.35
MYO1E	bta-miR-2334	-4.35
ATXN1L	bta-miR-2334	-4.35
RADIL	bta-miR-2334	-4.35
ATP6V1G1	bta-miR-2334	-4.35
AVEN	bta-miR-2334	-4.35
AVPR2	bta-miR-2334	-4.35
TAOK3	bta-miR-2334	-4.35
CD58	bta-miR-2334	-4.35
ATMIN	bta-miR-2334	-4.35
E2F4	bta-miR-2334	-4.35
NPL	bta-miR-2334	-4.35
GAPT	bta-miR-2334	-4.35
ZNF592	bta-miR-2334	-4.35
MACF1	bta-miR-2334	-4.35
KBTBD2	bta-miR-2334	-4.35
MRPS25	bta-miR-2334	-4.35
NUP54	bta-miR-2334	-4.35
TNPO1	bta-miR-2334	-4.35
ARPP21	bta-miR-2334	-4.35
TMEM55B	bta-miR-2334	-4.35
SAMD12	bta-miR-2334	-4.35
MPP5	bta-miR-2334	-4.35
SPTLC1	bta-miR-2334	-4.35
MRPL45	bta-miR-2334	-4.35
CLDN10	bta-miR-2334	-4.35
STK16	bta-miR-2334	-4.35
TPD52L2	bta-miR-2334	-4.35
CLIP4	bta-miR-2334	-4.35
URM1	bta-miR-2334	-4.35
MYO7A	bta-miR-2334	-4.35
KBTBD4	bta-miR-2334	-4.35
CMTM3	bta-miR-2334	-4.35
PLXDC1	bta-miR-2334	-4.35
ESRRA	bta-miR-2334	-4.35
AFG3L2	bta-miR-2334	-4.35
DENND1B	bta-miR-2334	-4.35
OVOL1	bta-miR-2334	-4.35
TRAF4	bta-miR-2334	-4.35
UBE2E2	bta-miR-2334	-4.35
PLK1	bta-miR-2334	-4.35
LYPLA2	bta-miR-2334	-4.35
BRCA1	bta-miR-2334	-4.35
SLC30A4	bta-miR-2334	-4.35
SIAH1	bta-miR-2334	-4.35
CWC25	bta-miR-2334	-4.35
PDCD6IP	bta-miR-2334	-4.35
PI16	bta-miR-2334	-4.35
ZBTB43	bta-miR-2334	-4.35
TSPAN3	bta-miR-2334	-4.35
CANT1	bta-miR-2334	-4.35
NCKIPSD	bta-miR-2334	-4.35
ITPK1	bta-miR-2334	-4.35
CHRAC1	bta-miR-2334	-4.35
ZNF329	bta-miR-2334	-4.35
SLC25A37	bta-miR-2334	-4.35
TK1	bta-miR-2334	-4.35
RPL29	bta-miR-2334	-4.35
RAB30	bta-miR-2334	-4.35
TBC1D24	bta-miR-2334	-4.35
CSPG5	bta-miR-2334	-4.35
GIT1	bta-miR-2334	-4.35
WDR92	bta-miR-2334	-4.35
TCF19	bta-miR-2334	-4.35
ZNF280B	bta-miR-2334	-4.35
NR4A1	bta-miR-2334	-4.35
SLC25A44	bta-miR-2334	-4.35
SCAMP3	bta-miR-2334	-4.35
WWP1	bta-miR-2334	-4.35
IPPK	bta-miR-2334	-4.35
PDP1	bta-miR-2334	-4.35
CHD8	bta-miR-2334	-4.35
GLS2	bta-miR-2334	-4.35
CCNL2	bta-miR-2334	-4.35
ADAR	bta-miR-2334	-4.35
UCHL1	bta-miR-2334	-4.35
KLHL18	bta-miR-2334	-4.35
RHOF	bta-miR-2334	-4.35
FAM110A	bta-miR-2334	-4.35
TMEM30B	bta-miR-2334	-4.35
ADORA2A	bta-miR-2334	-4.35
PSMG4	bta-miR-2334	-4.35
HAS2	bta-miR-2334	-4.35
RHBDL2	bta-miR-2334	-4.35
ANKRD52	bta-miR-2334	-4.35
PCGF3	bta-miR-2334	-4.35
CREBL2	bta-miR-2334	-4.35
TRIM26	bta-miR-2334	-4.35
ELOVL2	bta-miR-2334	-4.35
LRRC3	bta-miR-2334	-4.35
DNAJB1	bta-miR-2334	-4.35
PLSCR4	bta-miR-2334	-4.35
GYS1	bta-miR-2334	-4.35
VAMP3	bta-miR-2334	-4.35
LDOC1L	bta-miR-2334	-4.35
CACNB3	bta-miR-2334	-4.35
APTX	bta-miR-2334	-4.35
PHF20	bta-miR-2334	-4.35
WARS	bta-miR-2334	-4.35
AHCY	bta-miR-2334	-4.35
AP1S3	bta-miR-2334	-4.35
C1QTNF6	bta-miR-2334	-4.35
XKRX	bta-miR-2334	-4.35
NUP35	bta-miR-2334	-4.35
JAGN1	bta-miR-2334	-4.35
PARK2	bta-miR-2334	-4.35
RAPGEF1	bta-miR-2334	-4.35
CTTN	bta-miR-2334	-4.35
DHX37	bta-miR-2334	-4.35
FNTA	bta-miR-2334	-4.35
RBPJ	bta-miR-2334	-4.35
LRCH3	bta-miR-2334	-4.35
PURA	bta-miR-2334	-4.35
IRF2BP2	bta-miR-2334	-4.35
STAG2	bta-miR-2334	-4.35
PMP22	bta-miR-2334	-4.35
ASB8	bta-miR-2334	-4.35
UBR2	bta-miR-2334	-4.35
CIB1	bta-miR-2334	-4.35
COIL	bta-miR-2334	-4.35
SERPINB5	bta-miR-2334	-4.35
PDPK1	bta-miR-2334	-4.35
AVL9	bta-miR-2334	-4.35
PDCD4	bta-miR-2334	-4.35
DRD2	bta-miR-2334	-4.35
COL4A1	bta-miR-2334	-4.35
PPIH	bta-miR-2334	-4.35
EXOC5	bta-miR-2334	-4.35
USP7	bta-miR-2334	-4.35
HADH	bta-miR-2334	-4.35
ARHGEF2	bta-miR-2334	-4.35
RAB35	bta-miR-2334	-4.35
ZBTB33	bta-miR-2334	-4.35
UBE3A	bta-miR-2334	-4.35
MRPL14	bta-miR-2334	-4.35
MTMR3	bta-miR-2334	-4.35
TMEM100	bta-miR-2334	-4.35
HNF4A	bta-miR-2334	-4.35
RAPGEFL1	bta-miR-2334	-4.35
RBPMS2	bta-miR-2334	-4.35
PGS1	bta-miR-2334	-4.35
FCHSD1	bta-miR-2334	-4.35
TMCC3	bta-miR-2334	-4.35
AURKAIP1	bta-miR-2334	-4.35
NDUFB10	bta-miR-2334	-4.35
AMZ1	bta-miR-2334	-4.35
CDKN2B	bta-miR-2334	-4.35
FRMD8	bta-miR-2334	-4.35
DZIP1	bta-miR-2334	-4.35
SOCS5	bta-miR-2334	-4.35
USP49	bta-miR-2334	-4.35
SRXN1	bta-miR-2334	-4.35
LDLRAD3	bta-miR-2334	-4.35
ATOH8	bta-miR-2334	-4.35
IRAK4	bta-miR-2334	-4.35
DOK1	bta-miR-2334	-4.35
SYNRG	bta-miR-2334	-4.35
SPEN	bta-miR-2334	-4.35
MAMDC2	bta-miR-2334	-4.35
AXIN2	bta-miR-2334	-4.35
SLC18A2	bta-miR-2334	-4.35
CSNK2A1	bta-miR-2334	-4.35
MCC	bta-miR-2334	-4.35
FAM127A	bta-miR-2334	-4.35
HAUS5	bta-miR-2334	-4.35
MACC1	bta-miR-2334	-4.35
TMEM51	bta-miR-2334	-4.35
FBXO21	bta-miR-2334	-4.35
MDM2	bta-miR-2334	-4.35
ANKRD49	bta-miR-2334	-4.35
SHISA5	bta-miR-2334	-4.35
MYBBP1A	bta-miR-2334	-4.35
CCDC97	bta-miR-2334	-4.35
MPL	bta-miR-2334	-4.35
CNIH2	bta-miR-2334	-4.35
CCNT2	bta-miR-2334	-4.35
PSMC1	bta-miR-2334	-4.35
DNAJC8	bta-miR-2334	-4.35
SAMD4B	bta-miR-2334	-4.35
EIF5B	bta-miR-2334	-4.35
RAB26	bta-miR-2334	-4.35
G3BP2	bta-miR-2334	-4.35
ACSL5	bta-miR-2334	-4.35
QSOX1	bta-miR-2334	-4.35
SLC30A7	bta-miR-2334	-4.35
CHAD	bta-miR-2334	-4.35
LNPEP	bta-miR-2334	-4.35
NOS2	bta-miR-2334	-4.35
PODN	bta-miR-2334	-4.35
UNG	bta-miR-2334	-4.35
GDPD5	bta-miR-2334	-4.35
KIF13A	bta-miR-2334	-4.35
CHDH	bta-miR-2334	-4.35
TAT	bta-miR-2334	-4.35
UBXN2B	bta-miR-2334	-4.35
SEC14L1	bta-miR-2334	-4.35
UBE2Q1	bta-miR-2334	-4.35
UBXN4	bta-miR-2334	-4.35
MCAT	bta-miR-2334	-4.35
BMP7	bta-miR-2334	-4.35
INPP5B	bta-miR-2334	-4.35
SGMS2	bta-miR-2334	-4.35
OSBPL10	bta-miR-2334	-4.35
PCIF1	bta-miR-2334	-4.35
ELP4	bta-miR-2334	-4.35
RFWD3	bta-miR-2334	-4.35
CSDE1	bta-miR-2334	-4.35
DTD1	bta-miR-2334	-4.35
EGLN1	bta-miR-2334	-4.35
BOK	bta-miR-2334	-4.35
ESRP1	bta-miR-2334	-4.35
SLC22A17	bta-miR-2334	-4.35
CCL5	bta-miR-2334	-4.35
DMRT2	bta-miR-2334	-4.35
TXNRD1	bta-miR-2334	-4.35
SLC45A3	bta-miR-2334	-4.35
NMNAT1	bta-miR-2334	-4.35
HMGA1	bta-miR-2334	-4.35
NEURL4	bta-miR-2334	-4.35
CARM1	bta-miR-2334	-4.35
LRIG1	bta-miR-2334	-4.35
PREPL	bta-miR-2334	-4.35
USP22	bta-miR-2334	-4.35
MARK2	bta-miR-2334	-4.35
POU2F1	bta-miR-2334	-4.35
PABPN1	bta-miR-2334	-4.35
EYA1	bta-miR-2334	-4.35
NFKBIE	bta-miR-2334	-4.35
SPG11	bta-miR-2334	-4.35
PTGR2	bta-miR-2334	-4.35
SAMD4A	bta-miR-2334	-4.35
SHANK2	bta-miR-2334	-4.35
SLC37A3	bta-miR-2334	-4.35
MAP1LC3B	bta-miR-2334	-4.35
CPEB1	bta-miR-2334	-4.35
PPARGC1A	bta-miR-2334	-4.35
TXLNA	bta-miR-2334	-4.35
ANO4	bta-miR-2334	-4.35
RBMS2	bta-miR-2334	-4.35
RALGAPA1	bta-miR-2334	-4.35
PLEKHB1	bta-miR-2334	-4.35
PTPN13	bta-miR-2334	-4.35
RFC2	bta-miR-2334	-4.35
NXNL2	bta-miR-2334	-4.35
CSNK1G3	bta-miR-2334	-4.35
GTF3C3	bta-miR-2334	-4.35
ETV1	bta-miR-2334	-4.35
TOR1AIP2	bta-miR-2334	-4.35
NDOR1	bta-miR-2334	-4.35
DRD3	bta-miR-2334	-4.35
GNG3	bta-miR-2334	-4.35
HN1L	bta-miR-2334	-4.35
NAGPA	bta-miR-2334	-4.35
AMIGO3	bta-miR-2334	-4.35
ZBTB9	bta-miR-2334	-4.35
GAA	bta-miR-2334	-4.35
STUB1	bta-miR-2334	-4.35
SNCA	bta-miR-2334	-4.35
ASB6	bta-miR-2334	-4.35
PDRG1	bta-miR-2334	-4.35
KIF3C	bta-miR-2334	-4.35
SLC19A3	bta-miR-2334	-4.35
CD276	bta-miR-2334	-4.35
RAB7L1	bta-miR-2334	-4.35
MAPK8IP1	bta-miR-2334	-4.35
ANKIB1	bta-miR-2334	-4.35
ZNF286A	bta-miR-2334	-4.35
DPM2	bta-miR-2334	-4.35
PI4K2A	bta-miR-2334	-4.35
TM2D1	bta-miR-2334	-4.35
ZNF184	bta-miR-2334	-4.35
USP36	bta-miR-2334	-4.35
SYS1	bta-miR-2334	-4.35
FBXL20	bta-miR-2334	-4.35
ANKRD54	bta-miR-2334	-4.35
SYTL2	bta-miR-2334	-4.35
ZRANB3	bta-miR-2334	-4.35
OGDH	bta-miR-2334	-4.35
ZNF391	bta-miR-2334	-4.35
TTLL4	bta-miR-2334	-4.35
PPM1A	bta-miR-2334	-4.35
DUSP11	bta-miR-2334	-4.35
ZBTB16	bta-miR-2334	-4.35
TUBB6	bta-miR-2334	-4.35
RRAGC	bta-miR-2334	-4.35
GCH1	bta-miR-2334	-4.35
AP3B1	bta-miR-2334	-4.35
HSPA4L	bta-miR-2334	-4.35
ITPR1	bta-miR-2334	-4.35
ZNF200	bta-miR-2334	-4.35
NPLOC4	bta-miR-2334	-4.35
DPY19L3	bta-miR-2334	-4.35
IPCEF1	bta-miR-2334	-4.35
ATXN7L2	bta-miR-2334	-4.35
MED20	bta-miR-2334	-4.35
TNFSF9	bta-miR-2334	-4.35
CDKN2AIPNL	bta-miR-2334	-4.35
SHISA3	bta-miR-2334	-4.35
SPTY2D1	bta-miR-2334	-4.35
NRN1	bta-miR-2334	-4.35
CMTM8	bta-miR-2334	-4.35
FBXO42	bta-miR-2334	-4.35
LEPRE1	bta-miR-2334	-4.35
CDC40	bta-miR-2334	-4.35
PRKCD	bta-miR-2334	-4.35
FAF1	bta-miR-2334	-4.35
RDH12	bta-miR-2334	-4.35
REEP3	bta-miR-2334	-4.35
TOR1B	bta-miR-2334	-4.35
CHD2	bta-miR-2334	-4.35
SNX12	bta-miR-2334	-4.35
SYCN	bta-miR-2334	-4.35
ENC1	bta-miR-2334	-4.35
CASR	bta-miR-2334	-4.35
SHARPIN	bta-miR-2334	-4.35
DCUN1D3	bta-miR-2334	-4.35
KRT34	bta-miR-2334	-4.35
CNNM4	bta-miR-2334	-4.35
CCDC79	bta-miR-2334	-4.35
CTDSPL	bta-miR-2334	-4.35
MAEA	bta-miR-2334	-4.35
PNMA1	bta-miR-2334	-4.35
MEX3C	bta-miR-2334	-4.35
PSIP1	bta-miR-2334	-4.35
HMGXB3	bta-miR-2334	-4.35
CPSF7	bta-miR-2334	-4.35
RPS6KA6	bta-miR-2334	-4.35
SGPL1	bta-miR-2334	-4.35
RORA	bta-miR-2334	-4.35
PSENEN	bta-miR-2334	-4.35
SCCPDH	bta-miR-2334	-4.35
PTCH1	bta-miR-2334	-4.35
TGOLN2	bta-miR-2334	-4.35
ATG4D	bta-miR-2334	-4.35
MAPKBP1	bta-miR-2334	-4.35
TRPV1	bta-miR-2334	-4.35
OSTM1	bta-miR-2334	-4.35
DDX17	bta-miR-2334	-4.35
KLHDC3	bta-miR-2334	-4.35
NPR2	bta-miR-2334	-4.35
TOMM34	bta-miR-2334	-4.35
UBR7	bta-miR-2334	-4.35
TMEM87B	bta-miR-2334	-4.35
CD164	bta-miR-2334	-4.35
CEP350	bta-miR-2334	-4.35
FAT2	bta-miR-2334	-4.35
PCMTD1	bta-miR-2334	-4.35
TUBD1	bta-miR-2334	-4.35
SNPH	bta-miR-2334	-4.35
P2RX1	bta-miR-2334	-4.35
TUB	bta-miR-2334	-4.35
ZC3H14	bta-miR-2334	-4.35
SH3BP5	bta-miR-2334	-4.35
INTU	bta-miR-2334	-4.35
SSBP1	bta-miR-2334	-4.35
ZNF217	bta-miR-2334	-4.35
KCND1	bta-miR-2334	-4.35
ITGA11	bta-miR-2334	-4.35
GPCPD1	bta-miR-2334	-4.35
SMEK2	bta-miR-2334	-4.35
TMEM231	bta-miR-2334	-4.35
FZD4	bta-miR-2334	-4.35
DVL1	bta-miR-2334	-4.35
CCDC137	bta-miR-2334	-4.35
LHX3	bta-miR-2334	-4.35
RFX3	bta-miR-2334	-4.35
ELMO2	bta-miR-2334	-4.35
NAA15	bta-miR-2334	-4.35
CAB39	bta-miR-2334	-4.35
SMARCB1	bta-miR-2334	-4.35
RASGEF1A	bta-miR-2334	-4.35
AHCYL1	bta-miR-2334	-4.35
SCNN1B	bta-miR-2334	-4.35
LOH12CR1	bta-miR-2334	-4.35
NFAM1	bta-miR-2334	-4.35
GKAP1	bta-miR-2334	-4.35
FER1L6	bta-miR-2334	-4.35
PI4KB	bta-miR-2334	-4.35
RAP1GAP	bta-miR-2334	-4.35
KIF2A	bta-miR-2334	-4.35
ANXA6	bta-miR-2334	-4.35
PDCL	bta-miR-2334	-4.35
TBCEL	bta-miR-2334	-4.35
PMM1	bta-miR-2334	-4.35
YWHAE	bta-miR-2334	-4.35
SDHAF2	bta-miR-2334	-4.35
DHX35	bta-miR-2334	-4.35
SEC14L3	bta-miR-2334	-4.35
AURKB	bta-miR-2334	-4.35
BICC1	bta-miR-2334	-4.35
CHML	bta-miR-2334	-4.35
MIS18A	bta-miR-2334	-4.35
VPS37B	bta-miR-2334	-4.35
CLASP2	bta-miR-2334	-4.35
RNGTT	bta-miR-2334	-4.35
PLEKHA8	bta-miR-2334	-4.35
CCDC43	bta-miR-2334	-4.35
MECOM	bta-miR-2334	-4.35
TMEM66	bta-miR-2334	-4.35
CAPRIN1	bta-miR-2334	-4.35
NAPB	bta-miR-2334	-4.35
DVL2	bta-miR-2334	-4.35
HERPUD1	bta-miR-2334	-4.35
CNDP1	bta-miR-2334	-4.35
USF1	bta-miR-2334	-4.35
LIPA	bta-miR-2334	-4.35
USP42	bta-miR-2334	-4.35
ANKRD13B	bta-miR-2334	-4.35
NUP50	bta-miR-2334	-4.35
TPI1	bta-miR-2334	-4.35
RNF146	bta-miR-2334	-4.35
CRYZL1	bta-miR-2334	-4.35
ORMDL3	bta-miR-2334	-4.35
ADPGK	bta-miR-2334	-4.35
SH3PXD2B	bta-miR-2334	-4.35
EIF4B	bta-miR-2334	-4.35
EGFL7	bta-miR-2334	-4.35
SERINC3	bta-miR-2334	-4.35
MYO9A	bta-miR-2334	-4.35
DIAPH2	bta-miR-2334	-4.35
TMED9	bta-miR-2334	-4.35
TRAFD1	bta-miR-2334	-4.35
PKIA	bta-miR-2334	-4.35
DENND4C	bta-miR-2334	-4.35
RALBP1	bta-miR-2334	-4.35
AMFR	bta-miR-2334	-4.35
CHMP4B	bta-miR-2334	-4.35
CCDC14	bta-miR-2334	-4.35
SYDE1	bta-miR-2334	-4.35
CCDC132	bta-miR-2334	-4.35
KLHL26	bta-miR-2334	-4.35
YOD1	bta-miR-2334	-4.35
RAB8B	bta-miR-2334	-4.35
PAPOLG	bta-miR-2334	-4.35
HIST2H2BE	bta-miR-2334	-4.35
PDGFRL	bta-miR-2334	-4.35
INPP5J	bta-miR-2334	-4.35
CORO1C	bta-miR-2334	-4.35
NF2	bta-miR-2334	-4.35
WDR33	bta-miR-2334	-4.35
CREBZF	bta-miR-2334	-4.35
ATP11A	bta-miR-2334	-4.35
SEMA6B	bta-miR-2334	-4.35
CHCHD1	bta-miR-2334	-4.35
SFMBT1	bta-miR-2334	-4.35
ZBTB39	bta-miR-2334	-4.35
LGALS9	bta-miR-2334	-4.35
CDH24	bta-miR-2334	-4.35
EPHA2	bta-miR-2334	-4.35
NHEJ1	bta-miR-2334	-4.35
ACTR1A	bta-miR-2334	-4.35
ATP2A2	bta-miR-2334	-4.35
FNDC4	bta-miR-2334	-4.35
SLC24A1	bta-miR-2334	-4.35
TGFBR3	bta-miR-2334	-4.35
MKX	bta-miR-2334	-4.35
SLU7	bta-miR-2334	-4.35
DUSP13	bta-miR-2334	-4.35
YIPF6	bta-miR-2334	-4.35
AMT	bta-miR-2334	-4.35
NEB	bta-miR-2334	-4.35
BIN3	bta-miR-2334	-4.35
KLF13	bta-miR-2334	-4.35
SLC9A1	bta-miR-2334	-4.35
RBPMS	bta-miR-2334	-4.35
CHN1	bta-miR-2334	-4.35
ETV3L	bta-miR-2334	-4.35
FGR	bta-miR-2334	-4.35
RIC3	bta-miR-2334	-4.35
C10orf107	bta-miR-2334	-4.35
ZFAND3	bta-miR-2334	-4.35
MTMR11	bta-miR-2334	-4.35
SLC16A3	bta-miR-2334	-4.35
LYPD6B	bta-miR-2334	-4.35
CRELD1	bta-miR-2334	-4.35
ZNF280C	bta-miR-2334	-4.35
ELP2	bta-miR-2334	-4.35
CDC42SE1	bta-miR-2334	-4.35
SSRP1	bta-miR-2334	-4.35
FAM117A	bta-miR-2334	-4.35
PAPSS2	bta-miR-2334	-4.35
DDX23	bta-miR-2334	-4.35
HSP90AB1	bta-miR-2334	-4.35
TRIM2	bta-miR-2334	-4.35
IHH	bta-miR-2334	-4.35
GHDC	bta-miR-2334	-4.35
CBX5	bta-miR-2334	-4.35
MKI67	bta-miR-2334	-4.35
CHIC1	bta-miR-2334	-4.35
UBR3	bta-miR-2334	-4.35
FLCN	bta-miR-2334	-4.35
SMYD5	bta-miR-2334	-4.35
SMARCD2	bta-miR-2334	-4.35
TJAP1	bta-miR-2334	-4.35
CCDC85C	bta-miR-2334	-4.35
RGS16	bta-miR-2334	-4.35
CALM1	bta-miR-2334	-4.35
DNAJA4	bta-miR-2334	-4.35
VCL	bta-miR-2334	-4.35
VTI1A	bta-miR-2334	-4.35
TNFAIP1	bta-miR-2334	-4.35
ADSS	bta-miR-2334	-4.35
HELLS	bta-miR-2334	-4.35
NR2C2	bta-miR-2334	-4.35
SPECC1L	bta-miR-2334	-4.35
SLC18A1	bta-miR-2334	-4.35
PRPS2	bta-miR-2334	-4.35
CBFB	bta-miR-2334	-4.35
DENND2C	bta-miR-2334	-4.35
SFT2D2	bta-miR-2334	-4.35
BCL2L1	bta-miR-2334	-4.35
PXN	bta-miR-2334	-4.35
NAA25	bta-miR-2334	-4.35
NSFL1C	bta-miR-2334	-4.35
SCAMP5	bta-miR-2334	-4.35
MYO1C	bta-miR-2334	-4.35
ALDH3A2	bta-miR-2334	-4.35
HS2ST1	bta-miR-2334	-4.35
ODC1	bta-miR-2334	-4.35
MBD1	bta-miR-2334	-4.35
KPNA2	bta-miR-2334	-4.35
SNTB2	bta-miR-2334	-4.35
LEF1	bta-miR-2334	-4.35
PSTPIP2	bta-miR-2334	-4.35
EML3	bta-miR-2334	-4.35
BSCL2	bta-miR-2334	-4.35
SORT1	bta-miR-2334	-4.35
FTSJ2	bta-miR-2334	-4.35
PTPN1	bta-miR-2334	-4.35
UBE2W	bta-miR-2334	-4.35
STIP1	bta-miR-2334	-4.35
CDK12	bta-miR-2334	-4.35
CNOT1	bta-miR-2334	-4.35
ERAL1	bta-miR-2334	-4.35
WDR47	bta-miR-2334	-4.35
MPP6	bta-miR-2334	-4.35
SPIB	bta-miR-2334	-4.35
STK36	bta-miR-2334	-4.35
GNA13	bta-miR-2334	-4.35
WTIP	bta-miR-2334	-4.35
TIPARP	bta-miR-2334	-4.35
CLP1	bta-miR-2334	-4.35
GPAM	bta-miR-2334	-4.35
ATF3	bta-miR-2334	-4.35
ETV6	bta-miR-2334	-4.35
ITGA10	bta-miR-2334	-4.35
ARL8B	bta-miR-2334	-4.35
FAM89A	bta-miR-2334	-4.35
F11R	bta-miR-2334	-4.35
PODXL	bta-miR-2334	-4.35
TPPP	bta-miR-2334	-4.35
DUSP7	bta-miR-2334	-4.35
BATF2	bta-miR-2334	-4.35
PANK1	bta-miR-2334	-4.35
FKBP5	bta-miR-2334	-4.35
ERCC4	bta-miR-2334	-4.35
HIST1H2BN	bta-miR-2334	-4.35
DEK	bta-miR-2334	-4.35
PRICKLE1	bta-miR-2334	-4.35
SH3BP5L	bta-miR-2334	-4.35
ANKRD34A	bta-miR-2334	-4.35
SPCS3	bta-miR-2334	-4.35
MGAT5	bta-miR-2334	-4.35
TTC33	bta-miR-2334	-4.35
RBM25	bta-miR-2334	-4.35
XPR1	bta-miR-2334	-4.35
ZFP1	bta-miR-2334	-4.35
ABHD4	bta-miR-2334	-4.35
EDEM1	bta-miR-2334	-4.35
GGA3	bta-miR-2334	-4.35
TMEM184B	bta-miR-2334	-4.35
PSMB2	bta-miR-2334	-4.35
ARL13A	bta-miR-2334	-4.35
FLRT3	bta-miR-2334	-4.35
MAP2K4	bta-miR-2334	-4.35
GJA4	bta-miR-2334	-4.35
PHF13	bta-miR-2334	-4.35
RUNX3	bta-miR-2334	-4.35
WASF3	bta-miR-2334	-4.35
PLXDC2	bta-miR-2334	-4.35
STX2	bta-miR-2334	-4.35
NUDC	bta-miR-2334	-4.35
STXBP1	bta-miR-2334	-4.35
RANBP9	bta-miR-2334	-4.35
PDCL3	bta-miR-2334	-4.35
HGSNAT	bta-miR-2334	-4.35
DNAJC3	bta-miR-2334	-4.35
RAB11B	bta-miR-2334	-4.35
MORN4	bta-miR-2334	-4.35
UCKL1	bta-miR-2334	-4.35
ARHGEF12	bta-miR-2334	-4.35
STX18	bta-miR-2334	-4.35
USP28	bta-miR-2334	-4.35
ALS2	bta-miR-2334	-4.35
PGAM5	bta-miR-2334	-4.35
IVD	bta-miR-2334	-4.35
FDX1	bta-miR-2334	-4.35
DGCR2	bta-miR-2334	-4.35
DHDDS	bta-miR-2334	-4.35
G6PC	bta-miR-2334	-4.35
BAG1	bta-miR-2334	-4.35
SYF2	bta-miR-2334	-4.35
PIM1	bta-miR-2334	-4.35
DST	bta-miR-2334	-4.35
EIF2AK1	bta-miR-2334	-4.35
VPS36	bta-miR-2334	-4.35
SEC22C	bta-miR-2334	-4.35
SETD3	bta-miR-2334	-4.35
ELP3	bta-miR-2334	-4.35
KCTD5	bta-miR-2334	-4.35
SLC25A15	bta-miR-2334	-4.35
SORBS3	bta-miR-2334	-4.35
CCDC93	bta-miR-2334	-4.35
WWC1	bta-miR-2334	-4.35
DDX21	bta-miR-2334	-4.35
STEAP2	bta-miR-2334	-4.35
RASD2	bta-miR-2334	-4.35
RNMT	bta-miR-2334	-4.35
PSMD10	bta-miR-2334	-4.35
NUPL1	bta-miR-2334	-4.35
SMARCD1	bta-miR-2334	-4.35
SEC61A1	bta-miR-2334	-4.35
PLAC9	bta-miR-2334	-4.35
APH1A	bta-miR-2334	-4.35
RSF1	bta-miR-2334	-4.35
ZNF397	bta-miR-2334	-4.35
CDK18	bta-miR-2334	-4.35
ARHGAP12	bta-miR-2334	-4.35
POLR2D	bta-miR-2334	-4.35
MAFG	bta-miR-2334	-4.35
JPH3	bta-miR-2334	-4.35
GLUD1	bta-miR-2334	-4.35
SCNN1G	bta-miR-2334	-4.35
RPUSD4	bta-miR-2334	-4.35
CISD2	bta-miR-2334	-4.35
CAPZA1	bta-miR-2334	-4.35
PPM1B	bta-miR-2334	-4.35
CNN1	bta-miR-2334	-4.35
LHX4	bta-miR-2334	-4.35
BAG5	bta-miR-2334	-4.35
NUDT10	bta-miR-2334	-4.35
KIF4A	bta-miR-2334	-4.35
ZFP36L1	bta-miR-2334	-4.35
NOL12	bta-miR-2334	-4.35
ZNF609	bta-miR-2334	-4.35
ARID1A	bta-miR-2334	-4.35
ARHGEF4	bta-miR-2334	-4.35
UPK1A	bta-miR-2334	-4.35
UPK2	bta-miR-2334	-4.35
PTPN9	bta-miR-2334	-4.35
HNRNPA3	bta-miR-2334	-4.35
MOCS2	bta-miR-2334	-4.35
GOLGA1	bta-miR-2334	-4.35
PANK3	bta-miR-2334	-4.35
NCOA3	bta-miR-2334	-4.35
TMEM180	bta-miR-2334	-4.35
HP1BP3	bta-miR-2334	-4.35
ADAL	bta-miR-2334	-4.35
NOX5	bta-miR-2334	-4.35
TPST1	bta-miR-2334	-4.35
RBM15B	bta-miR-2334	-4.35
MTF2	bta-miR-2334	-4.35
MTF1	bta-miR-2334	-4.35
MTHFR	bta-miR-2334	-4.35
SLC6A4	bta-miR-2334	-4.35
SPINT2	bta-miR-2334	-4.35
JPH1	bta-miR-2334	-4.35
SETX	bta-miR-2334	-4.35
PDK2	bta-miR-2334	-4.35
PTPRF	bta-miR-2334	-4.35
MYO10	bta-miR-2334	-4.35
SLC2A8	bta-miR-2334	-4.35
TMEM201	bta-miR-2334	-4.35
RBM27	bta-miR-2334	-4.35
MED29	bta-miR-2334	-4.35
INTS3	bta-miR-2334	-4.35
UNC13B	bta-miR-2334	-4.35
TBPL1	bta-miR-2334	-4.35
PGAP3	bta-miR-2334	-4.35
E2F1	bta-miR-2334	-4.35
GJB5	bta-miR-2334	-4.35
ATP2C1	bta-miR-2334	-4.35
YWHAG	bta-miR-2334	-4.35
IFRD1	bta-miR-2334	-4.35
GNG12	bta-miR-2334	-4.35
RIMS3	bta-miR-2334	-4.35
ANGEL2	bta-miR-2334	-4.35
TKT	bta-miR-2334	-4.35
PARP11	bta-miR-2334	-4.35
NEK7	bta-miR-2334	-4.35
AAK1	bta-miR-2334	-4.35
TXNDC9	bta-miR-2334	-4.35
DNAJB2	bta-miR-2334	-4.35
ACVR2A	bta-miR-2334	-4.35
PPP2R2B	bta-miR-2334	-4.35
OGDHL	bta-miR-2334	-4.35
GYG1	bta-miR-2334	-4.35
SHOX2	bta-miR-2334	-4.35
NAV1	bta-miR-2334	-4.35
ROCK2	bta-miR-2334	-4.35
DDX55	bta-miR-2334	-4.35
DSTYK	bta-miR-2334	-4.35
KLF6	bta-miR-2334	-4.35
UBE2N	bta-miR-2334	-4.35
DCAF7	bta-miR-2334	-4.35
CMTM4	bta-miR-2334	-4.35
HCN4	bta-miR-2334	-4.35
MKNK1	bta-miR-2334	-4.35
LRBA	bta-miR-2334	-4.35
PPTC7	bta-miR-2334	-4.35
NAA30	bta-miR-2334	-4.35
PYROXD1	bta-miR-2334	-4.35
TBKBP1	bta-miR-2334	-4.35
ITIH1	bta-miR-2334	-4.35
INPP5F	bta-miR-2334	-4.35
NAAA	bta-miR-2334	-4.35
UBE4A	bta-miR-2334	-4.35
DKK3	bta-miR-2334	-4.35
KPNA6	bta-miR-2334	-4.35
SETDB2	bta-miR-2334	-4.35
PTAR1	bta-miR-2334	-4.35
BACE2	bta-miR-2334	-4.35
TMEM19	bta-miR-2334	-4.35
TACC1	bta-miR-2334	-4.35
NEK9	bta-miR-2334	-4.35
IAH1	bta-miR-2334	-4.35
SIRT5	bta-miR-2334	-4.35
UBASH3B	bta-miR-2334	-4.35
NXF1	bta-miR-2334	-4.35
ADAM15	bta-miR-2334	-4.35
MYD88	bta-miR-2334	-4.35
DCP1A	bta-miR-2334	-4.35
BMP2	bta-miR-2334	-4.35
PRKG1	bta-miR-2334	-4.35
BSDC1	bta-miR-2334	-4.35
CRNKL1	bta-miR-2334	-4.35
PTDSS1	bta-miR-2334	-4.35
TRPS1	bta-miR-2334	-4.35
DCUN1D1	bta-miR-2334	-4.35
NSG2	bta-miR-2334	-4.35
PCDH19	bta-miR-2334	-4.35
PPFIA2	bta-miR-2334	-4.35
SLC25A26	bta-miR-2334	-4.35
TBL1XR1	bta-miR-2334	-4.35
CNTROB	bta-miR-2334	-4.35
ZBTB5	bta-miR-2334	-4.35
SMURF1	bta-miR-2334	-4.35
GPX8	bta-miR-2334	-4.35
ATXN7	bta-miR-2334	-4.35
GNPTAB	bta-miR-2334	-4.35
HOXB4	bta-miR-2334	-4.35
TSPYL4	bta-miR-2334	-4.35
MTBP	bta-miR-2334	-4.35
C6orf25	bta-miR-2334	-4.35
ACACA	bta-miR-2334	-4.35
NANOS1	bta-miR-2334	-4.35
LPHN3	bta-miR-2334	-4.35
NID1	bta-miR-2334	-4.35
PDE8A	bta-miR-2334	-4.35
NHSL1	bta-miR-2334	-4.35
RABEP1	bta-miR-2334	-4.35
CARKD	bta-miR-2334	-4.35
RBM33	bta-miR-2334	-4.35
ALAS1	bta-miR-2334	-4.35
EXOC6	bta-miR-2334	-4.35
TRIM59	bta-miR-2334	-4.35
FEM1B	bta-miR-2334	-4.35
VPS39	bta-miR-2334	-4.35
AP1G1	bta-miR-2334	-4.35
ADAMTSL1	bta-miR-2334	-4.35
THRA	bta-miR-2334	-4.35
POLR2F	bta-miR-2334	-4.35
KCNE1	bta-miR-2334	-4.35
VSIG4	bta-miR-2334	-4.35
MKS1	bta-miR-2334	-4.35
CYC1	bta-miR-2334	-4.35
PPFIA4	bta-miR-2334	-4.35
SPOPL	bta-miR-2334	-4.35
CDCA2	bta-miR-2334	-4.35
SYNGR2	bta-miR-2334	-4.35
TUBA4A	bta-miR-2334	-4.35
MON1B	bta-miR-2334	-4.35
FAF2	bta-miR-2334	-4.35
TSC1	bta-miR-2334	-4.35
CLN5	bta-miR-2334	-4.35
GNB5	bta-miR-2334	-4.35
NOL4	bta-miR-2334	-4.35
PRKACB	bta-miR-2334	-4.35
RABGAP1	bta-miR-2334	-4.35
CD40	bta-miR-2334	-4.35
SLC39A9	bta-miR-2334	-4.35
POLRMT	bta-miR-2334	-4.35
MAX	bta-miR-2334	-4.35
RIC8B	bta-miR-2334	-4.35
IRF1	bta-miR-2334	-4.35
SLC6A20	bta-miR-2334	-4.35
UBE2R2	bta-miR-2334	-4.35
KIF2C	bta-miR-2334	-4.35
ERRFI1	bta-miR-2334	-4.35
CDT1	bta-miR-2334	-4.35
CDC27	bta-miR-2334	-4.35
SETD1A	bta-miR-2334	-4.35
AACS	bta-miR-2334	-4.35
TMEM214	bta-miR-2334	-4.35
GPR173	bta-miR-2334	-4.35
RAB6A	bta-miR-2334	-4.35
CAP1	bta-miR-2334	-4.35
HNRNPA2B1	bta-miR-2334	-4.35
KATNAL1	bta-miR-2334	-4.35
CDKL2	bta-miR-2334	-4.35
OSBPL3	bta-miR-2334	-4.35
ATG13	bta-miR-2334	-4.35
EPB41L5	bta-miR-2334	-4.35
TOP2B	bta-miR-2334	-4.35
CYTH3	bta-miR-2334	-4.35
MMAA	bta-miR-2334	-4.35
CDH7	bta-miR-2334	-4.35
ADM2	bta-miR-2334	-4.35
BARD1	bta-miR-2334	-4.35
RBCK1	bta-miR-2334	-4.35
KANK1	bta-miR-2334	-4.35
DHRS4	bta-miR-2334	-4.35
PYGO1	bta-miR-2334	-4.35
RAD52	bta-miR-2334	-4.35
ABHD2	bta-miR-2334	-4.35
ANKRD6	bta-miR-2334	-4.35
FAM32A	bta-miR-2334	-4.35
CRYBG3	bta-miR-2334	-4.35
TRAPPC2L	bta-miR-2334	-4.35
ACER3	bta-miR-2334	-4.35
CUL2	bta-miR-2334	-4.35
TUBGCP4	bta-miR-2334	-4.35
ZNRF2	bta-miR-2334	-4.35
CDK9	bta-miR-2334	-4.35
LRRC47	bta-miR-2334	-4.35
SMG7	bta-miR-2334	-4.35
YKT6	bta-miR-2334	-4.35
VPS13B	bta-miR-2334	-4.35
NODAL	bta-miR-2334	-4.35
EIF3J	bta-miR-2334	-4.35
PIP5K1C	bta-miR-2334	-4.35
STX7	bta-miR-2334	-4.35
DYNLL2	bta-miR-2334	-4.35
GAB2	bta-miR-2334	-4.35
ZNF618	bta-miR-2334	-4.35
IP6K3	bta-miR-2334	-4.35
FUBP1	bta-miR-2334	-4.35
SRRD	bta-miR-2334	-4.35
CYTH1	bta-miR-2334	-4.35
PHLDB2	bta-miR-2334	-4.35
RPRD1B	bta-miR-2334	-4.35
MIB1	bta-miR-2334	-4.35
FGF2	bta-miR-2334	-4.35
TMEM135	bta-miR-2334	-4.35
UBE2I	bta-miR-2334	-4.35
PTPRT	bta-miR-2334	-4.35
TBRG1	bta-miR-2334	-4.35
EHMT1	bta-miR-2334	-4.35
PCMTD2	bta-miR-2334	-4.35
NUMB	bta-miR-2334	-4.35
NEDD4L	bta-miR-2334	-4.35
PDS5B	bta-miR-2334	-4.35
STK17A	bta-miR-2334	-4.35
ERLIN2	bta-miR-2334	-4.35
SLC6A5	bta-miR-2334	-4.35
RHBDD1	bta-miR-2334	-4.35
APPL1	bta-miR-2334	-4.35
RYBP	bta-miR-2334	-4.35
LCORL	bta-miR-2334	-4.35
POLR3D	bta-miR-2334	-4.35
PRUNE2	bta-miR-2334	-4.35
TP53I11	bta-miR-2334	-4.35
TARSL2	bta-miR-2334	-4.35
RFC3	bta-miR-2334	-4.35
YLPM1	bta-miR-2334	-4.35
IRX4	bta-miR-2334	-4.35
NHLH1	bta-miR-2334	-4.35
IMPAD1	bta-miR-2334	-4.35
GRB10	bta-miR-2334	-4.35
TMEM68	bta-miR-2334	-4.35
GK5	bta-miR-2334	-4.35
ASRGL1	bta-miR-2334	-4.35
MAP3K3	bta-miR-2334	-4.35
UNC13D	bta-miR-2334	-4.35
UBAP2L	bta-miR-2334	-4.35
MRAS	bta-miR-2334	-4.35
CDC25C	bta-miR-2334	-4.35
ZBTB38	bta-miR-2334	-4.35
SF3A2	bta-miR-2334	-4.35
MT1A	bta-miR-2334	-4.35
ESCO1	bta-miR-2334	-4.35
ERBB2IP	bta-miR-2334	-4.35
WDR52	bta-miR-2334	-4.35
ARL5B	bta-miR-2334	-4.35
METTL8	bta-miR-2334	-4.35
RAB11FIP4	bta-miR-2334	-4.35
IGF1R	bta-miR-2334	-4.35
SFXN3	bta-miR-2334	-4.35
PLEKHN1	bta-miR-2334	-4.35
DNMBP	bta-miR-2334	-4.35
ZNF532	bta-miR-2334	-4.35
ELF1	bta-miR-2334	-4.35
NIN	bta-miR-2334	-4.35
SHMT1	bta-miR-2334	-4.35
NUP214	bta-miR-2334	-4.35
ANKS4B	bta-miR-2334	-4.35
LIN7A	bta-miR-2334	-4.35
CCDC50	bta-miR-2334	-4.35
HDGFL1	bta-miR-2334	-4.35
ZBTB46	bta-miR-2334	-4.35
PPP2R5C	bta-miR-2334	-4.35
IGSF9B	bta-miR-2334	-4.35
AGAP3	bta-miR-2334	-4.35
DMXL2	bta-miR-2334	-4.35
ADAM11	bta-miR-2334	-4.35
ARPC5L	bta-miR-2334	-4.35
TRAF3IP1	bta-miR-2334	-4.35
ADCY9	bta-miR-2334	-4.35
UGCG	bta-miR-2334	-4.35
MED1	bta-miR-2334	-4.35
TBC1D4	bta-miR-2334	-4.35
PSEN1	bta-miR-2334	-4.35
HINT3	bta-miR-2334	-4.35
VCPIP1	bta-miR-2334	-4.35
PAPD4	bta-miR-2334	-4.35
CDC42BPA	bta-miR-2334	-4.35
ZNF212	bta-miR-2334	-4.35
PEX5	bta-miR-2334	-4.35
ACAP3	bta-miR-2334	-4.35
ACOT9	bta-miR-2334	-4.35
GNL1	bta-miR-2334	-4.35
CDK5R1	bta-miR-2334	-4.35
CES3	bta-miR-2334	-4.35
OTUB1	bta-miR-2334	-4.35
MRPL30	bta-miR-2334	-4.35
SLC9A3R2	bta-miR-2334	-4.35
FNTB	bta-miR-2334	-4.35
HSF1	bta-miR-2334	-4.35
KLHL21	bta-miR-2334	-4.35
PSKH1	bta-miR-2334	-4.35
SP3	bta-miR-2334	-4.35
MESDC2	bta-miR-2334	-4.35
PXMP4	bta-miR-2334	-4.35
UBXN2A	bta-miR-2334	-4.35
TNFAIP8L3	bta-miR-2334	-4.35
LRRC55	bta-miR-2334	-4.35
ACTR2	bta-miR-2334	-4.35
NUTF2	bta-miR-2334	-4.35
OTUD3	bta-miR-2334	-4.35
TOLLIP	bta-miR-2334	-4.35
TNRC6B	bta-miR-2334	-4.35
PRDM6	bta-miR-2334	-4.35
HMG20A	bta-miR-2334	-4.35
ZNF395	bta-miR-2334	-4.35
KRT73	bta-miR-2334	-4.35
PRDM5	bta-miR-2334	-4.35
COLQ	bta-miR-2334	-4.35
ST13	bta-miR-2334	-4.35
ZSCAN12	bta-miR-2334	-4.35
PSD3	bta-miR-2334	-4.35
SH2B3	bta-miR-2334	-4.35
IMPDH1	bta-miR-2334	-4.35
NECAB2	bta-miR-2334	-4.35
MBNL1	bta-miR-2334	-4.35
CNP	bta-miR-2334	-4.35
MYNN	bta-miR-2334	-4.35
NFATC3	bta-miR-2334	-4.35
MFAP1	bta-miR-2334	-4.35
HELZ	bta-miR-2334	-4.35
TMEM115	bta-miR-2334	-4.35
PPARD	bta-miR-2334	-4.35
ATE1	bta-miR-2334	-4.35
FLVCR2	bta-miR-2334	-4.35
ARFGEF1	bta-miR-2334	-4.35
HEXIM1	bta-miR-2334	-4.35
SEMA4F	bta-miR-2334	-4.35
PCSK1	bta-miR-2334	-4.35
USP13	bta-miR-2334	-4.35
NCK1	bta-miR-2334	-4.35
LRCH4	bta-miR-2334	-4.35
TSPYL2	bta-miR-2334	-4.35
DNAJB14	bta-miR-2334	-4.35
GPR3	bta-miR-2334	-4.35
SLC27A1	bta-miR-2334	-4.35
DBT	bta-miR-2334	-4.35
DNAJC27	bta-miR-2334	-4.35
CYLD	bta-miR-2334	-4.35
TFRC	bta-miR-2334	-4.35
DR1	bta-miR-2334	-4.35
UCK2	bta-miR-2334	-4.35
EPSTI1	bta-miR-2334	-4.35
PPIP5K1	bta-miR-2334	-4.35
DPYSL2	bta-miR-2334	-4.35
ARID5B	bta-miR-2334	-4.35
RASA1	bta-miR-2334	-4.35
MAPKAPK3	bta-miR-2334	-4.35
WHSC1	bta-miR-2334	-4.35
DBNL	bta-miR-2334	-4.35
ZNF652	bta-miR-2334	-4.35
HIP1	bta-miR-2334	-4.35
DENND3	bta-miR-2334	-4.35
ZNF248	bta-miR-2334	-4.35
VPS4A	bta-miR-2334	-4.35
EFTUD2	bta-miR-2334	-4.35
PLXNC1	bta-miR-2334	-4.35
AATK	bta-miR-2334	-4.35
INPP5D	bta-miR-2334	-4.35
TOMM22	bta-miR-2334	-4.35
PITPNA	bta-miR-2334	-4.35
MANEAL	bta-miR-2334	-4.35
GRK6	bta-miR-2334	-4.35
RPL27A	bta-miR-2334	-4.35
PDXDC1	bta-miR-2334	-4.35
AR	bta-miR-2334	-4.35
XKR7	bta-miR-2334	-4.35
CBL	bta-miR-2334	-4.35
STK38	bta-miR-2334	-4.35
WDR31	bta-miR-2334	-4.35
CDC25A	bta-miR-2334	-4.35
KREMEN1	bta-miR-2334	-4.35
TMEM63C	bta-miR-2334	-4.35
ZMIZ1	bta-miR-2334	-4.35
PREX1	bta-miR-2334	-4.35
MEAF6	bta-miR-2334	-4.35
MAPK14	bta-miR-2334	-4.35
KCMF1	bta-miR-2334	-4.35
FGFR2	bta-miR-2334	-4.35
TFAP2A	bta-miR-2334	-4.35
LRRC4	bta-miR-2334	-4.35
PTPN18	bta-miR-2334	-4.35
IKBKB	bta-miR-2334	-4.35
C6orf106	bta-miR-2334	-4.35
MAK16	bta-miR-2334	-4.35
RMND5B	bta-miR-2334	-4.35
PTPN3	bta-miR-2334	-4.35
CTSB	bta-miR-2334	-4.35
DBN1	bta-miR-2334	-4.35
ZCWPW2	bta-miR-2334	-4.35
BAZ2A	bta-miR-2334	-4.35
SLC36A1	bta-miR-2334	-4.35
SREBF2	bta-miR-2334	-4.35
CHCHD7	bta-miR-2334	-4.35
GIT2	bta-miR-2334	-4.35
TRAM2	bta-miR-2334	-4.35
ZRANB1	bta-miR-2334	-4.35
TUBA8	bta-miR-2334	-4.35
FAM49B	bta-miR-2334	-4.35
DERL3	bta-miR-2334	-4.35
AZI2	bta-miR-2334	-4.35
WASF2	bta-miR-2334	-4.35
RFFL	bta-miR-2334	-4.35
DBX2	bta-miR-2334	-4.35
PDGFA	bta-miR-2334	-4.35
TLX2	bta-miR-2334	-4.35
TPCN1	bta-miR-2334	-4.35
SPSB3	bta-miR-2334	-4.35
ASAH1	bta-miR-2334	-4.35
CCDC92	bta-miR-2334	-4.35
RER1	bta-miR-2334	-4.35
TBXA2R	bta-miR-2334	-4.35
LMO4	bta-miR-2334	-4.35
UHRF1BP1	bta-miR-2334	-4.35
SLC35A3	bta-miR-2334	-4.35
WDR59	bta-miR-2334	-4.35
TMEM150A	bta-miR-2334	-4.35
AK2	bta-miR-2334	-4.35
CCDC47	bta-miR-2334	-4.35
PRDX6	bta-miR-2334	-4.35
GABBR2	bta-miR-2334	-4.35
TMEM120B	bta-miR-2334	-4.35
CCNT1	bta-miR-2334	-4.35
GFPT1	bta-miR-2334	-4.35
UROS	bta-miR-2334	-4.35
NUCKS1	bta-miR-2334	-4.35
TWSG1	bta-miR-2334	-4.35
PRKAR2A	bta-miR-2334	-4.35
TRERF1	bta-miR-2334	-4.35
MYBL1	bta-miR-2334	-4.35
TBL1X	bta-miR-2334	-4.35
DEPDC1	bta-miR-2334	-4.35
ST5	bta-miR-2334	-4.35
FAM120A	bta-miR-2334	-4.35
SLC43A1	bta-miR-2334	-4.35
ZMAT3	bta-miR-2334	-4.35
CHMP4A	bta-miR-2334	-4.35
MARCH7	bta-miR-2334	-4.35
LARP4B	bta-miR-2334	-4.35
CDYL2	bta-miR-2334	-4.35
SNX29	bta-miR-2334	-4.35
COMMD7	bta-miR-2334	-4.35
ZC3H13	bta-miR-2334	-4.35
ABCF2	bta-miR-2334	-4.35
TTLL12	bta-miR-2334	-4.35
SGCB	bta-miR-2334	-4.35
P4HA3	bta-miR-2334	-4.35
UBE2H	bta-miR-2334	-4.35
SLC2A3	bta-miR-2334	-4.35
TMEM181	bta-miR-2334	-4.35
MMP16	bta-miR-2334	-4.35
DNAJC16	bta-miR-2334	-4.35
LPGAT1	bta-miR-2334	-4.35
KLHL12	bta-miR-2334	-4.35
NAA35	bta-miR-2334	-4.35
GNAQ	bta-miR-2334	-4.35
WNT2B	bta-miR-2334	-4.35
RNF114	bta-miR-2334	-4.35
NUCB1	bta-miR-2334	-4.35
FAM110B	bta-miR-2334	-4.35
CDC42EP3	bta-miR-2334	-4.35
PCGF2	bta-miR-2334	-4.35
ZNF638	bta-miR-2334	-4.35
PAQR5	bta-miR-2334	-4.35
ATPAF1	bta-miR-2334	-4.35
HIP1R	bta-miR-2334	-4.35
ZNF445	bta-miR-2334	-4.35
PIK3CB	bta-miR-2334	-4.35
ASB16	bta-miR-2334	-4.35
NOD1	bta-miR-2334	-4.35
VMAC	bta-miR-2334	-4.35
TTLL1	bta-miR-2334	-4.35
SKA3	bta-miR-2334	-4.35
ZNF319	bta-miR-2334	-4.35
MGRN1	bta-miR-2334	-4.35
STRADA	bta-miR-2334	-4.35
TAOK1	bta-miR-2334	-4.35
ITPKC	bta-miR-2334	-4.35
OSBP	bta-miR-2334	-4.35
SALL4	bta-miR-2334	-4.35
UMPS	bta-miR-2334	-4.35
OPRK1	bta-miR-2334	-4.35
NFATC2	bta-miR-2334	-4.35
RNF166	bta-miR-2334	-4.35
BTRC	bta-miR-2334	-4.35
MICAL2	bta-miR-2334	-4.35
PDZD8	bta-miR-2334	-4.35
ZDHHC17	bta-miR-2334	-4.35
RAB21	bta-miR-2334	-4.35
SUZ12	bta-miR-2334	-4.35
NR0B1	bta-miR-2334	-4.35
GPRIN3	bta-miR-2334	-4.35
IST1	bta-miR-2334	-4.35
RNF115	bta-miR-2334	-4.35
ARAP2	bta-miR-2334	-4.35
GXYLT1	bta-miR-2334	-4.35
TTC39A	bta-miR-2334	-4.35
DISP2	bta-miR-2334	-4.35
SLC9A9	bta-miR-2334	-4.35
SDAD1	bta-miR-2334	-4.35
TMCC1	bta-miR-2334	-4.35
KDM5A	bta-miR-2334	-4.35
VKORC1L1	bta-miR-2334	-4.35
FOXN3	bta-miR-2334	-4.35
FASTKD2	bta-miR-2334	-4.35
RPH3AL	bta-miR-2334	-4.35
WHSC1L1	bta-miR-2334	-4.35
CD2BP2	bta-miR-2334	-4.35
STIM2	bta-miR-2334	-4.35
URB2	bta-miR-2334	-4.35
SHROOM3	bta-miR-2334	-4.35
BCKDK	bta-miR-2334	-4.35
SLC39A10	bta-miR-2334	-4.35
CCDC86	bta-miR-2334	-4.35
IQCK	bta-miR-2334	-4.35
APLP2	bta-miR-2334	-4.35
SS18L1	bta-miR-2334	-4.35
LAMC1	bta-miR-2334	-4.35
PINK1	bta-miR-2334	-4.35
SYNJ2BP	bta-miR-2334	-4.35
SP1	bta-miR-2334	-4.35
STXBP6	bta-miR-2334	-4.35
SETD2	bta-miR-2334	-4.35
RAD9A	bta-miR-2334	-4.35
WDR6	bta-miR-2334	-4.35
SPRED2	bta-miR-2334	-4.35
LDLR	bta-miR-2334	-4.35
RPLP1	bta-miR-2334	-4.35
PAK1	bta-miR-2334	-4.35
NUP205	bta-miR-2334	-4.35
VPS33A	bta-miR-2334	-4.35
WDFY2	bta-miR-2334	-4.35
SLC4A4	bta-miR-2334	-4.35
CSGALNACT2	bta-miR-2334	-4.35
MAP1B	bta-miR-2334	-4.35
PLEKHA6	bta-miR-2334	-4.35
MRPL48	bta-miR-2334	-4.35
GINS4	bta-miR-2334	-4.35
YWHAZ	bta-miR-2334	-4.35
TMEM86B	bta-miR-2334	-4.35
KIN	bta-miR-2334	-4.35
PLEKHB2	bta-miR-2334	-4.35
TMC4	bta-miR-2334	-4.35
HSPA12A	bta-miR-2334	-4.35
LARP1	bta-miR-2334	-4.35
NCOA5	bta-miR-2334	-4.35
KCTD10	bta-miR-2334	-4.35
VANGL1	bta-miR-2334	-4.35
SLIT3	bta-miR-2334	-4.35
ZNF318	bta-miR-2334	-4.35
SRRM1	bta-miR-2334	-4.35
VPS41	bta-miR-2334	-4.35
CCDC64	bta-miR-2334	-4.35
VPS26A	bta-miR-2334	-4.35
MRM1	bta-miR-2334	-4.35
SLC31A1	bta-miR-2334	-4.35
CIRBP	bta-miR-2334	-4.35
HECTD3	bta-miR-2334	-4.35
DNAJC11	bta-miR-2334	-4.35
SCUBE3	bta-miR-2334	-4.35
RAP2A	bta-miR-2334	-4.35
PIAS1	bta-miR-2334	-4.35
KLF12	bta-miR-2334	-4.35
ARHGAP25	bta-miR-2334	-4.35
CYP19A1	bta-miR-2334	-4.35
NGFR	bta-miR-2334	-4.35
HK1	bta-miR-2334	-4.35
EIF3L	bta-miR-2334	-4.35
FXR1	bta-miR-2334	-4.35
IER3IP1	bta-miR-2334	-4.35
TIMM8A	bta-miR-2334	-4.35
POPDC3	bta-miR-2334	-4.35
TMEM8A	bta-miR-2334	-4.35
MAPK8IP2	bta-miR-2334	-4.35
SLC25A30	bta-miR-2334	-4.35
STX6	bta-miR-2334	-4.35
ZCCHC3	bta-miR-2334	-4.35
CLN6	bta-miR-2334	-4.35
ABAT	bta-miR-2334	-4.35
SUV39H1	bta-miR-2334	-4.35
LEPROTL1	bta-miR-2334	-4.35
CD47	bta-miR-2334	-4.35
FOXP4	bta-miR-2334	-4.35
RFK	bta-miR-2334	-4.35
SMAD4	bta-miR-2334	-4.35
ZNF226	bta-miR-2334	-4.35
SPTLC2	bta-miR-2334	-4.35
PSMB5	bta-miR-2334	-4.35
DOK4	bta-miR-2334	-4.35
TLN2	bta-miR-2334	-4.35
ACOT11	bta-miR-2334	-4.35
ATPIF1	bta-miR-2334	-4.35
[truncated: 710 more rows]

## Sheet: Table S5
Table S5. Dataset of targets related to 2-cell embryo competence of 10vs16 months contrast for IPA
Ortholog of target gene	Representative miRNA	FC of miRNA
KIF3C	bta-miR-133a	1.89
GBA2	bta-miR-133a	1.89
SNRK	bta-miR-133a	1.89
NRIP3	bta-miR-133a	1.89
CDK13	bta-miR-133a	1.89
LPIN2	bta-miR-133a	1.89
PLCL2	bta-miR-133a	1.89
TMEM57	bta-miR-133a	1.89
CDCA8	bta-miR-133a	1.89
ASH1L	bta-miR-133a	1.89
XPO1	bta-miR-133a	1.89
MAFG	bta-miR-133a	1.89
PTMA	bta-miR-133a	1.89
SIRT1	bta-miR-133a	1.89
CD47	bta-miR-133a	1.89
KDM2A	bta-miR-133a	1.89
JAZF1	bta-miR-133a	1.89
HMGXB3	bta-miR-133a	1.89
GMEB1	bta-miR-133a	1.89
NIPA1	bta-miR-133a	1.89
SRPK1	bta-miR-133a	1.89
PIKFYVE	bta-miR-19b	2.2
CBFB	bta-miR-19b	2.2
DOCK3	bta-miR-19b	2.2
TM2D1	bta-miR-2285b	-3.45
PYROXD1	bta-miR-2285b	-3.45
LIX1	bta-miR-2285b	-3.45
FAM60A	bta-miR-2285b	-3.45
UBE2G1	bta-miR-2285b	-3.45
MON2	bta-miR-2285b	-3.45
EDEM3	bta-miR-2285b	-3.45
PM20D1	bta-miR-2285b	-3.45
UBE2D1	bta-miR-2285b	-3.45
RPE	bta-miR-2285b	-3.45
ZDHHC21	bta-miR-2285b	-3.45
HAUS4	bta-miR-2285b	-3.45
BTG1	bta-miR-2285b	-3.45
OSGEPL1	bta-miR-2285b	-3.45
CPEB4	bta-miR-2285b	-3.45
C7orf57	bta-miR-2285b	-3.45
LPCAT2	bta-miR-2285b	-3.45
DPY30	bta-miR-2285b	-3.45
RCBTB2	bta-miR-2285b	-3.45
GRPEL2	bta-miR-2285b	-3.45
SCP2	bta-miR-2285b	-3.45
FERMT1	bta-miR-2285b	-3.45
GRB2	bta-miR-2285b	-3.45
PBK	bta-miR-2285b	-3.45
LYSMD3	bta-miR-2285b	-3.45
IMPACT	bta-miR-2285b	-3.45
MITF	bta-miR-2285b	-3.45
PEX7	bta-miR-2285b	-3.45
MED17	bta-miR-2285b	-3.45
RAB35	bta-miR-2285b	-3.45
AIDA	bta-miR-2285b	-3.45
MTMR7	bta-miR-2285b	-3.45
SPIN1	bta-miR-2285b	-3.45
PDS5A	bta-miR-2285b	-3.45
SIX3	bta-miR-2285b	-3.45
DCTN5	bta-miR-2285b	-3.45
WWC2	bta-miR-2285b	-3.45
SHOC2	bta-miR-2285b	-3.45
JAK2	bta-miR-2285b	-3.45
ZBTB33	bta-miR-2285b	-3.45
SNRNP40	bta-miR-2285b	-3.45
CTBS	bta-miR-2285b	-3.45
RBM4B	bta-miR-2285b	-3.45
CAND1	bta-miR-2285b	-3.45
CDC7	bta-miR-2285b	-3.45
FNBP1L	bta-miR-2285b	-3.45
UBE2W	bta-miR-2285b	-3.45
MXI1	bta-miR-2285b	-3.45
RAB8B	bta-miR-2285b	-3.45
TERF2IP	bta-miR-2285b	-3.45
IFT81	bta-miR-2285b	-3.45
UPF3A	bta-miR-2285b	-3.45
NDFIP2	bta-miR-2285b	-3.45
BTF3L4	bta-miR-2285b	-3.45
ERLEC1	bta-miR-2285b	-3.45
TBC1D15	bta-miR-2285b	-3.45
PRPS2	bta-miR-2285b	-3.45
PTP4A1	bta-miR-2285b	-3.45
LGMN	bta-miR-2285b	-3.45
SEC23A	bta-miR-2285b	-3.45
RNF145	bta-miR-2285b	-3.45
HIAT1	bta-miR-2285b	-3.45
CLK3	bta-miR-2285b	-3.45
SH3BGRL2	bta-miR-2285b	-3.45
AP1S3	bta-miR-2285b	-3.45
QPCT	bta-miR-2285b	-3.45
LIG4	bta-miR-2285b	-3.45
IGF2BP2	bta-miR-2285b	-3.45
CTDSPL2	bta-miR-2285b	-3.45
CALU	bta-miR-2285b	-3.45
NUDT12	bta-miR-2285b	-3.45
PWWP2A	bta-miR-2285b	-3.45
NUDT4	bta-miR-2285b	-3.45
CLIC4	bta-miR-2285b	-3.45
MARCKSL1	bta-miR-2285b	-3.45
MED28	bta-miR-2285b	-3.45
ZDHHC13	bta-miR-2285b	-3.45
NAB1	bta-miR-2285b	-3.45
NUMBL	bta-miR-2285b	-3.45
NRXN1	bta-miR-2285b	-3.45
PTPRM	bta-miR-2285b	-3.45
NAA30	bta-miR-2285b	-3.45
GABRA4	bta-miR-2285b	-3.45
EEF2K	bta-miR-2285b	-3.45
FBXO8	bta-miR-2285b	-3.45
STOM	bta-miR-2285b	-3.45
GFM1	bta-miR-2285b	-3.45
RFX5	bta-miR-2285b	-3.45
ATM	bta-miR-2285b	-3.45
NUBPL	bta-miR-2285b	-3.45
ALDH1A2	bta-miR-2285b	-3.45
SGCB	bta-miR-2285b	-3.45
RBL2	bta-miR-2285b	-3.45
PPP4R2	bta-miR-2285b	-3.45
LRP11	bta-miR-2285b	-3.45
GPAM	bta-miR-2285b	-3.45
LRRC59	bta-miR-2285b	-3.45
GNA14	bta-miR-2285b	-3.45
PRKRIP1	bta-miR-2285b	-3.45
GOPC	bta-miR-2285b	-3.45
HOOK3	bta-miR-2285b	-3.45
SPAG9	bta-miR-2285b	-3.45
ESF1	bta-miR-2285b	-3.45
GABPA	bta-miR-2285b	-3.45
ANP32E	bta-miR-2285b	-3.45
CYP4V2	bta-miR-2285b	-3.45
AEBP2	bta-miR-2285b	-3.45
EIF2AK3	bta-miR-2285b	-3.45
KCTD9	bta-miR-2285b	-3.45
DNAJC25	bta-miR-2285b	-3.45
STRN	bta-miR-2285b	-3.45
CCNJ	bta-miR-2285b	-3.45
MAP3K7	bta-miR-2285b	-3.45
RBM46	bta-miR-2285b	-3.45
XIAP	bta-miR-2285b	-3.45
CASC5	bta-miR-2285b	-3.45
NCOA4	bta-miR-2285b	-3.45
NET1	bta-miR-2285b	-3.45
SLC41A2	bta-miR-2285b	-3.45
C8orf47	bta-miR-2285b	-3.45
LARS	bta-miR-2285b	-3.45
VPS26A	bta-miR-2285b	-3.45
ITCH	bta-miR-2285b	-3.45
MAP7	bta-miR-2285b	-3.45
OXCT1	bta-miR-2285b	-3.45
DCTN6	bta-miR-2285b	-3.45
UHMK1	bta-miR-2285b	-3.45
ZBTB44	bta-miR-2285b	-3.45
PRMT3	bta-miR-2285b	-3.45
CDV3	bta-miR-2285b	-3.45
ARFIP1	bta-miR-2285b	-3.45
MAL2	bta-miR-2285b	-3.45
FPGT	bta-miR-2285b	-3.45
ROCK1	bta-miR-2285b	-3.45
TSC1	bta-miR-2285b	-3.45
DHTKD1	bta-miR-2285b	-3.45
STAG1	bta-miR-2285b	-3.45
TMEM169	bta-miR-2285b	-3.45
NEDD4	bta-miR-2285b	-3.45
ACSL6	bta-miR-2285b	-3.45
LRRC8B	bta-miR-2285b	-3.45
TUBGCP4	bta-miR-2285b	-3.45
NAMPT	bta-miR-2285b	-3.45
RASL10B	bta-miR-2285b	-3.45
ZYG11B	bta-miR-2285b	-3.45
ENAH	bta-miR-2285b	-3.45
MSL1	bta-miR-2285b	-3.45
TTC9C	bta-miR-2285b	-3.45
THAP6	bta-miR-2285b	-3.45
GLCE	bta-miR-2285b	-3.45
SPAG16	bta-miR-2285b	-3.45
PAICS	bta-miR-2285b	-3.45
NBEAL1	bta-miR-2285b	-3.45
STC1	bta-miR-2285b	-3.45
WDR11	bta-miR-2285b	-3.45
ERN1	bta-miR-2285b	-3.45
RRAGD	bta-miR-2285b	-3.45
RICTOR	bta-miR-2285b	-3.45
UTP6	bta-miR-2285b	-3.45
UBR2	bta-miR-2285b	-3.45
MRE11A	bta-miR-2285b	-3.45
GNG2	bta-miR-2285b	-3.45
RBMS3	bta-miR-2285b	-3.45
AGMAT	bta-miR-2285b	-3.45
MYSM1	bta-miR-2285b	-3.45
SLIT3	bta-miR-2285b	-3.45
TACC1	bta-miR-2285b	-3.45
RAB14	bta-miR-2285b	-3.45
FGFR1OP	bta-miR-2285b	-3.45
ZNF638	bta-miR-2285b	-3.45
RAB18	bta-miR-2285b	-3.45
GAD1	bta-miR-2285b	-3.45
SNX13	bta-miR-2285b	-3.45
KDM4C	bta-miR-2285b	-3.45
PLXDC1	bta-miR-2285b	-3.45
SNAP25	bta-miR-2285b	-3.45
ITPR1	bta-miR-2285b	-3.45
CBX1	bta-miR-2285b	-3.45
CDK1	bta-miR-2285b	-3.45
CBX5	bta-miR-2285b	-3.45
JMJD1C	bta-miR-2285b	-3.45
AMIGO1	bta-miR-2285b	-3.45
CLASP2	bta-miR-2285b	-3.45
SENP7	bta-miR-2285b	-3.45
USP34	bta-miR-2285b	-3.45
ZRANB1	bta-miR-2285b	-3.45
RBM22	bta-miR-2285b	-3.45
STON1	bta-miR-2285b	-3.45
GNAI3	bta-miR-2285b	-3.45
TBC1D19	bta-miR-2285b	-3.45
MIPOL1	bta-miR-2285b	-3.45
DCAF12	bta-miR-2285b	-3.45
KIN	bta-miR-2285b	-3.45
SLC6A4	bta-miR-2285b	-3.45
ITGA4	bta-miR-2285b	-3.45
UBR1	bta-miR-2285b	-3.45
PAFAH1B1	bta-miR-2285b	-3.45
KIF2A	bta-miR-2285b	-3.45
AGO2	bta-miR-2285b	-3.45
ACSS3	bta-miR-2285b	-3.45
UBA5	bta-miR-2285b	-3.45
FMR1	bta-miR-2285b	-3.45
TSN	bta-miR-2285b	-3.45
GK	bta-miR-2285b	-3.45
PCMTD2	bta-miR-2285b	-3.45
NUMA1	bta-miR-2285b	-3.45
SLC9A9	bta-miR-2285b	-3.45
NFATC3	bta-miR-2285b	-3.45
CTNNB1	bta-miR-2285b	-3.45
INPP5F	bta-miR-2285b	-3.45
SLC39A14	bta-miR-2285b	-3.45
THBS1	bta-miR-2285b	-3.45
MYO1B	bta-miR-2285b	-3.45
SEPT11	bta-miR-2285b	-3.45
FAR1	bta-miR-2285b	-3.45
ZNF793	bta-miR-2285b	-3.45
PPTC7	bta-miR-2285b	-3.45
DHX36	bta-miR-2285b	-3.45
NRG1	bta-miR-2285b	-3.45
KCTD15	bta-miR-2285b	-3.45
CREBZF	bta-miR-2285b	-3.45
KIAA1715	bta-miR-2285b	-3.45
NOL7	bta-miR-2285b	-3.45
ERLIN2	bta-miR-2285b	-3.45
UTP15	bta-miR-2285b	-3.45
SMAD4	bta-miR-2285b	-3.45
MEF2C	bta-miR-2285b	-3.45
MYNN	bta-miR-2285b	-3.45
SAP30BP	bta-miR-2285b	-3.45
PNPT1	bta-miR-2285b	-3.45
RBM12B	bta-miR-2285b	-3.45
RCN2	bta-miR-2285b	-3.45
GJC1	bta-miR-2285b	-3.45
SNX1	bta-miR-2285b	-3.45
SORL1	bta-miR-2285b	-3.45
SHOX2	bta-miR-2285b	-3.45
LMOD3	bta-miR-2285b	-3.45
UBR3	bta-miR-2285b	-3.45
HRH1	bta-miR-2285b	-3.45
NID1	bta-miR-2285b	-3.45
SALL4	bta-miR-2285b	-3.45
IMPAD1	bta-miR-2285b	-3.45
PURA	bta-miR-2285b	-3.45
GRASP	bta-miR-2285b	-3.45
DIP2B	bta-miR-2285b	-3.45
ANKLE2	bta-miR-2285b	-3.45
OTUD3	bta-miR-2285b	-3.45
SPTLC2	bta-miR-2285b	-3.45
MXD1	bta-miR-2285b	-3.45
ACTR8	bta-miR-2285b	-3.45
RANBP2	bta-miR-2285b	-3.45
MAP2	bta-miR-2285b	-3.45
DYNC1LI1	bta-miR-2285b	-3.45
GK5	bta-miR-2285b	-3.45
LYPLA1	bta-miR-2285b	-3.45
PIK3CA	bta-miR-2285b	-3.45
AGTPBP1	bta-miR-2285b	-3.45
RAB3IP	bta-miR-2285b	-3.45
AKAP12	bta-miR-2285b	-3.45
ATP6V1D	bta-miR-2285b	-3.45
DEPDC1	bta-miR-2285b	-3.45
RPGRIP1L	bta-miR-2285b	-3.45
PAWR	bta-miR-2285b	-3.45
HNRNPU	bta-miR-2285b	-3.45
MTMR3	bta-miR-2285b	-3.45
RIF1	bta-miR-2285b	-3.45
VPS33A	bta-miR-2285b	-3.45
AQR	bta-miR-2285b	-3.45
TTC30A	bta-miR-2285b	-3.45
PPIP5K2	bta-miR-2285b	-3.45
ZFYVE16	bta-miR-2285b	-3.45
ETV5	bta-miR-2285b	-3.45
KPNA3	bta-miR-2285b	-3.45
WAC	bta-miR-2285b	-3.45
APLF	bta-miR-2285b	-3.45
PRIM1	bta-miR-2285b	-3.45
NENF	bta-miR-2285b	-3.45
ZNF566	bta-miR-2285b	-3.45
ACAD8	bta-miR-2285b	-3.45
SRFBP1	bta-miR-2285b	-3.45
SFT2D2	bta-miR-2285b	-3.45
APC	bta-miR-2285b	-3.45
ZNF326	bta-miR-2285b	-3.45
DCAF5	bta-miR-2285b	-3.45
UBA6	bta-miR-2285b	-3.45
OBFC1	bta-miR-2285b	-3.45
KDELR1	bta-miR-2285b	-3.45
CEP78	bta-miR-2285b	-3.45
PTS	bta-miR-2285b	-3.45
NUP155	bta-miR-2285b	-3.45
GCN1L1	bta-miR-2285b	-3.45
DHX40	bta-miR-2285b	-3.45
ARHGEF5	bta-miR-2285b	-3.45
ASCC1	bta-miR-2285b	-3.45
GAPVD1	bta-miR-2285b	-3.45
PARG	bta-miR-2285b	-3.45
NGDN	bta-miR-2285b	-3.45
SSR1	bta-miR-2285b	-3.45
HMGCR	bta-miR-2285b	-3.45
NUP37	bta-miR-2285b	-3.45
ACADL	bta-miR-2285b	-3.45
RAB40B	bta-miR-2285b	-3.45
TSPAN14	bta-miR-2285b	-3.45
SCAMP1	bta-miR-2285b	-3.45
MTHFD1	bta-miR-2285b	-3.45
PHYH	bta-miR-2285b	-3.45
DAP	bta-miR-2285b	-3.45
NUP88	bta-miR-2285b	-3.45
PPP1R15B	bta-miR-2285b	-3.45
UBC	bta-miR-2285b	-3.45
SART1	bta-miR-2285b	-3.45
CYFIP1	bta-miR-2285b	-3.45
PCMT1	bta-miR-2285b	-3.45
TMEM59	bta-miR-2285b	-3.45
NETO1	bta-miR-2285b	-3.45
PLSCR1	bta-miR-2285b	-3.45
RBM17	bta-miR-2285b	-3.45
ATP6V1G2	bta-miR-2285b	-3.45
CDV3	bta-miR-2405	-1.52
HNRNPAB	bta-miR-2405	-1.52
TMEM169	bta-miR-2405	-1.52
MAL2	bta-miR-2405	-1.52
PRMT3	bta-miR-2405	-1.52
DCTN5	bta-miR-2405	-1.52
STAG1	bta-miR-2405	-1.52
PDPK1	bta-miR-2405	-1.52
MED23	bta-miR-2405	-1.52
CABLES2	bta-miR-2405	-1.52
COL24A1	bta-miR-2405	-1.52
RNF130	bta-miR-2405	-1.52
TRIM36	bta-miR-2405	-1.52
EIF3C	bta-miR-2405	-1.52
PURA	bta-miR-2405	-1.52
CLK3	bta-miR-2405	-1.52
DAP	bta-miR-2405	-1.52
TEX261	bta-miR-2405	-1.52
SLC35A2	bta-miR-2405	-1.52
DNAJC16	bta-miR-2405	-1.52
FAM89A	bta-miR-2405	-1.52
MKNK1	bta-miR-2405	-1.52
CDK4	bta-miR-2405	-1.52
UBAP1	bta-miR-2405	-1.52
CGN	bta-miR-2405	-1.52
RSPO2	bta-miR-2405	-1.52
SPIN1	bta-miR-2405	-1.52
NAA30	bta-miR-2405	-1.52
SCP2	bta-miR-2405	-1.52
UBE2G1	bta-miR-2405	-1.52
ELP2	bta-miR-2405	-1.52
ZNF326	bta-miR-2405	-1.52
GLS2	bta-miR-2405	-1.52
ZBTB9	bta-miR-2405	-1.52
TMPO	bta-miR-2405	-1.52
B4GALT5	bta-miR-2405	-1.52
SEC13	bta-miR-2405	-1.52
ZNF281	bta-miR-2405	-1.52
TBRG1	bta-miR-2405	-1.52
CD3EAP	bta-miR-2405	-1.52
SPTLC2	bta-miR-2405	-1.52
KREMEN1	bta-miR-2405	-1.52
XIRP1	bta-miR-2405	-1.52
GRASP	bta-miR-2405	-1.52
AKAP12	bta-miR-2405	-1.52
ALDH1A2	bta-miR-2405	-1.52
PIP4K2A	bta-miR-2405	-1.52
NAA40	bta-miR-2405	-1.52
GPN2	bta-miR-2405	-1.52
KIAA0586	bta-miR-2405	-1.52
GOLIM4	bta-miR-2405	-1.52
NEDD4	bta-miR-2405	-1.52
H1F0	bta-miR-2405	-1.52
ERN1	bta-miR-2405	-1.52
KDM2B	bta-miR-2405	-1.52
NUP214	bta-miR-2405	-1.52
DAB2	bta-miR-2405	-1.52
APAF1	bta-miR-2405	-1.52
RTTN	bta-miR-2405	-1.52
SLIT3	bta-miR-2405	-1.52
MITF	bta-miR-2405	-1.52
RALB	bta-miR-2405	-1.52
UBLCP1	bta-miR-2405	-1.52
SHOC2	bta-miR-2405	-1.52
FSTL1	bta-miR-2405	-1.52
PLXDC1	bta-miR-2405	-1.52
SEC31B	bta-miR-2405	-1.52
JMY	bta-miR-2405	-1.52
TTC30A	bta-miR-2405	-1.52
IGF2BP2	bta-miR-2405	-1.52
TMEM184B	bta-miR-2405	-1.52
NUDT12	bta-miR-2405	-1.52
THBS4	bta-miR-2405	-1.52
RPE	bta-miR-2405	-1.52
TSC1	bta-miR-2405	-1.52
MED13	bta-miR-2405	-1.52
FBXO8	bta-miR-2405	-1.52
ABHD5	bta-miR-2405	-1.52
KIAA1715	bta-miR-2405	-1.52
FAM129A	bta-miR-2405	-1.52
GLCE	bta-miR-2405	-1.52
ZNF638	bta-miR-2405	-1.52
COG3	bta-miR-2405	-1.52
ACTR8	bta-miR-2405	-1.52
PRUNE2	bta-miR-2405	-1.52
IARS	bta-miR-2405	-1.52
KDM4C	bta-miR-2405	-1.52
AMPD3	bta-miR-2405	-1.52
ANK3	bta-miR-2405	-1.52
UBR2	bta-miR-2405	-1.52
DYNC1LI1	bta-miR-2405	-1.52
GALNT13	bta-miR-2405	-1.52
CBX1	bta-miR-2405	-1.52
AQR	bta-miR-2405	-1.52
AGPAT6	bta-miR-2405	-1.52
TRDMT1	bta-miR-2405	-1.52
G3BP1	bta-miR-2405	-1.52
ARFIP1	bta-miR-2405	-1.52
NOL7	bta-miR-2405	-1.52
SLC1A4	bta-miR-2405	-1.52
LRRC8B	bta-miR-2405	-1.52
TSPAN14	bta-miR-2405	-1.52
LDOC1L	bta-miR-2405	-1.52
RALY	bta-miR-2405	-1.52
STC1	bta-miR-2405	-1.52
LYPLA1	bta-miR-2405	-1.52
IMPAD1	bta-miR-2405	-1.52
HOOK3	bta-miR-2405	-1.52
ACSL3	bta-miR-2405	-1.52
TBL1X	bta-miR-2405	-1.52
TLE3	bta-miR-2405	-1.52
RAB3IP	bta-miR-2405	-1.52
CIRBP	bta-miR-2405	-1.52
RIPK4	bta-miR-2405	-1.52
EEF2K	bta-miR-2405	-1.52
SIPA1L2	bta-miR-2405	-1.52
PPIP5K2	bta-miR-2405	-1.52
RRAGD	bta-miR-2405	-1.52
ADAM17	bta-miR-2405	-1.52
CALU	bta-miR-2405	-1.52
GRHPR	bta-miR-2405	-1.52
STRN	bta-miR-2405	-1.52
SF3B3	bta-miR-2405	-1.52
APPBP2	bta-miR-2405	-1.52
APLF	bta-miR-2405	-1.52
SSR1	bta-miR-2405	-1.52
CEP120	bta-miR-2405	-1.52
MAPK14	bta-miR-2405	-1.52
DCTN6	bta-miR-2405	-1.52
MTMR3	bta-miR-2405	-1.52
RBM12B	bta-miR-2405	-1.52
BTF3L4	bta-miR-2405	-1.52
MYSM1	bta-miR-2405	-1.52
CAND1	bta-miR-2405	-1.52
CCDC127	bta-miR-2405	-1.52
RPGRIP1L	bta-miR-2405	-1.52
TTC4	bta-miR-2405	-1.52
WTIP	bta-miR-2405	-1.52
SIPA1	bta-miR-2405	-1.52
TBC1D19	bta-miR-2405	-1.52
PIK3CA	bta-miR-2405	-1.52
NUP88	bta-miR-2405	-1.52
MED28	bta-miR-2405	-1.52
KDM3A	bta-miR-2405	-1.52
GDE1	bta-miR-2405	-1.52
TMEM59	bta-miR-2405	-1.52
BAG1	bta-miR-2405	-1.52
ZFYVE16	bta-miR-2405	-1.52
FPGT	bta-miR-2405	-1.52
POLR3B	bta-miR-2405	-1.52
FKBP3	bta-miR-2405	-1.52

## Sheet: Table S6
Table S6. Dataset of targets related to 2-cell embryo competence of 12vs16 months contrast for IPA
Ortholog of target gene	Representative miRNA	FC of miRNA
TKTL1	bta-miR-759	4.99
ADK	bta-miR-759	4.99
NRXN1	bta-miR-759	4.99
ZNF449	bta-miR-759	4.99
ATAD1	bta-miR-759	4.99
NCAPG	bta-miR-759	4.99
MAP3K7	bta-miR-759	4.99
GINS1	bta-miR-2284z	4.44
FPGT	bta-miR-2284z	4.44
PSAT1	bta-miR-2284z	4.44
NUMBL	bta-miR-34b	2.14
ITCH	bta-miR-34b	2.14
PPP1R11	bta-miR-34b	2.14
ELL2	bta-miR-34b	2.14
UBE2G1	bta-miR-34b	2.14
WAC	bta-miR-34b	2.14
IL2RA	bta-miR-2285e	-2.44
CCNJ	bta-miR-2285e	-2.44
LONP2	bta-miR-2285e	-2.44
EFEMP1	bta-miR-302a	-2.38
RICTOR	bta-miR-302a	-2.38
AEBP2	bta-miR-302a	-2.38
ASH1L	bta-miR-302a	-2.38
RTN1	bta-miR-302a	-2.38
MEF2C	bta-miR-302a	-2.38
SSR1	bta-miR-302a	-2.38
UHMK1	bta-miR-302a	-2.38
LGR4	bta-miR-302a	-2.38
PIP4K2A	bta-miR-302a	-2.38
SS18L1	bta-miR-302a	-2.38
SMARCC2	bta-miR-302a	-2.38
PIK3CA	bta-miR-302a	-2.38
STIL	bta-miR-302a	-2.38
MAL2	bta-miR-302a	-2.38
CALM1	bta-miR-302a	-2.38
CDC23	bta-miR-302a	-2.38
GXYLT1	bta-miR-302a	-2.38
ZNF436	bta-miR-302a	-2.38
MTMR3	bta-miR-302a	-2.38
GMEB1	bta-miR-302a	-2.38
RGL1	bta-miR-302a	-2.38
FNBP1L	bta-miR-302a	-2.38
HOOK3	bta-miR-302a	-2.38
JAZF1	bta-miR-302a	-2.38
DHX40	bta-miR-302a	-2.38
ASCC1	bta-miR-302a	-2.38
SYAP1	bta-miR-302a	-2.38
SP1	bta-miR-302a	-2.38
UBR3	bta-miR-302a	-2.38
ZRANB1	bta-miR-302a	-2.38
AKT3	bta-miR-302a	-2.38
ACADSB	bta-miR-302a	-2.38
HNRNPA2B1	bta-miR-302a	-2.38
NOL7	bta-miR-302a	-2.38
ADD1	bta-miR-302a	-2.38
SQSTM1	bta-miR-302a	-2.38
EIF5A2	bta-miR-302a	-2.38
MED13	bta-miR-302a	-2.38
RSRC2	bta-miR-302a	-2.38
PPIP5K2	bta-miR-302a	-2.38
BNC2	bta-miR-302a	-2.38
CABLES2	bta-miR-2334	-4.35
CYFIP1	bta-miR-2334	-4.35
BET1L	bta-miR-2334	-4.35
MIPOL1	bta-miR-2334	-4.35
RGL1	bta-miR-2334	-4.35
NPTN	bta-miR-2334	-4.35
ARMC7	bta-miR-2334	-4.35
TMEM97	bta-miR-2334	-4.35
PAICS	bta-miR-2334	-4.35
DCTN5	bta-miR-2334	-4.35
MTHFD1	bta-miR-2334	-4.35
TTC4	bta-miR-2334	-4.35
SHOC2	bta-miR-2334	-4.35
SSR1	bta-miR-2334	-4.35
COX7C	bta-miR-2334	-4.35
CALU	bta-miR-2334	-4.35
LMAN2	bta-miR-2334	-4.35
SLC31A2	bta-miR-2334	-4.35
FAM60A	bta-miR-2334	-4.35
CDC23	bta-miR-2334	-4.35
TRIB1	bta-miR-2334	-4.35
FOXO1	bta-miR-2334	-4.35
B4GALT1	bta-miR-2334	-4.35
CNNM3	bta-miR-2334	-4.35
AKAP12	bta-miR-2334	-4.35
FOSL2	bta-miR-2334	-4.35
ELOVL5	bta-miR-2334	-4.35
LPIN2	bta-miR-2334	-4.35
ESRRG	bta-miR-2334	-4.35
WDTC1	bta-miR-2334	-4.35
CDK4	bta-miR-2334	-4.35
PIKFYVE	bta-miR-2334	-4.35
COL24A1	bta-miR-2334	-4.35
TASP1	bta-miR-2334	-4.35
UTP6	bta-miR-2334	-4.35
PLXDC1	bta-miR-2334	-4.35
SIAH1	bta-miR-2334	-4.35
ZNF329	bta-miR-2334	-4.35
SCAMP3	bta-miR-2334	-4.35
GLS2	bta-miR-2334	-4.35
PCGF3	bta-miR-2334	-4.35
LDOC1L	bta-miR-2334	-4.35
AP1S3	bta-miR-2334	-4.35
DHX37	bta-miR-2334	-4.35
PURA	bta-miR-2334	-4.35
UBR2	bta-miR-2334	-4.35
PDPK1	bta-miR-2334	-4.35
RAB35	bta-miR-2334	-4.35
ZBTB33	bta-miR-2334	-4.35
MTMR3	bta-miR-2334	-4.35
TMEM100	bta-miR-2334	-4.35
CDKN2B	bta-miR-2334	-4.35
SLC18A2	bta-miR-2334	-4.35
PSMC1	bta-miR-2334	-4.35
QSOX1	bta-miR-2334	-4.35
LRIG1	bta-miR-2334	-4.35
MAP1LC3B	bta-miR-2334	-4.35
RALGAPA1	bta-miR-2334	-4.35
NXNL2	bta-miR-2334	-4.35
NDOR1	bta-miR-2334	-4.35
HN1L	bta-miR-2334	-4.35
ZBTB9	bta-miR-2334	-4.35
KIF3C	bta-miR-2334	-4.35
CD276	bta-miR-2334	-4.35
TM2D1	bta-miR-2334	-4.35
ITPR1	bta-miR-2334	-4.35
ATXN7L2	bta-miR-2334	-4.35
TNFSF9	bta-miR-2334	-4.35
SPTY2D1	bta-miR-2334	-4.35
ENC1	bta-miR-2334	-4.35
HMGXB3	bta-miR-2334	-4.35
DDX17	bta-miR-2334	-4.35
TMEM87B	bta-miR-2334	-4.35
TUB	bta-miR-2334	-4.35
SH3BP5	bta-miR-2334	-4.35
ZNF217	bta-miR-2334	-4.35
GPCPD1	bta-miR-2334	-4.35
CCDC137	bta-miR-2334	-4.35
KIF2A	bta-miR-2334	-4.35
AURKB	bta-miR-2334	-4.35
CLASP2	bta-miR-2334	-4.35
CCDC43	bta-miR-2334	-4.35
MECOM	bta-miR-2334	-4.35
ANKRD13B	bta-miR-2334	-4.35
RAB8B	bta-miR-2334	-4.35
CREBZF	bta-miR-2334	-4.35
SLC24A1	bta-miR-2334	-4.35
NEB	bta-miR-2334	-4.35
BIN3	bta-miR-2334	-4.35
ELP2	bta-miR-2334	-4.35
CBX5	bta-miR-2334	-4.35
UBR3	bta-miR-2334	-4.35
FLCN	bta-miR-2334	-4.35
TJAP1	bta-miR-2334	-4.35
CALM1	bta-miR-2334	-4.35
VCL	bta-miR-2334	-4.35
PRPS2	bta-miR-2334	-4.35
CBFB	bta-miR-2334	-4.35
SFT2D2	bta-miR-2334	-4.35
ALDH3A2	bta-miR-2334	-4.35
BSCL2	bta-miR-2334	-4.35
UBE2W	bta-miR-2334	-4.35
CDK12	bta-miR-2334	-4.35
ERAL1	bta-miR-2334	-4.35
WTIP	bta-miR-2334	-4.35
GPAM	bta-miR-2334	-4.35
FAM89A	bta-miR-2334	-4.35
TMEM184B	bta-miR-2334	-4.35
BAG1	bta-miR-2334	-4.35
SYF2	bta-miR-2334	-4.35
ELP3	bta-miR-2334	-4.35
PLAC9	bta-miR-2334	-4.35
MAFG	bta-miR-2334	-4.35
KIF4A	bta-miR-2334	-4.35
ARHGEF4	bta-miR-2334	-4.35
SLC6A4	bta-miR-2334	-4.35
TMEM201	bta-miR-2334	-4.35
ANGEL2	bta-miR-2334	-4.35
PARP11	bta-miR-2334	-4.35
OGDHL	bta-miR-2334	-4.35
SHOX2	bta-miR-2334	-4.35
MKNK1	bta-miR-2334	-4.35
LRBA	bta-miR-2334	-4.35
PPTC7	bta-miR-2334	-4.35
NAA30	bta-miR-2334	-4.35
PYROXD1	bta-miR-2334	-4.35
INPP5F	bta-miR-2334	-4.35
UBE4A	bta-miR-2334	-4.35
TACC1	bta-miR-2334	-4.35
SIRT5	bta-miR-2334	-4.35
MYD88	bta-miR-2334	-4.35
SMURF1	bta-miR-2334	-4.35
HOXB4	bta-miR-2334	-4.35
NID1	bta-miR-2334	-4.35
TSC1	bta-miR-2334	-4.35
RABGAP1	bta-miR-2334	-4.35
CD40	bta-miR-2334	-4.35
HNRNPA2B1	bta-miR-2334	-4.35
TUBGCP4	bta-miR-2334	-4.35
CYTH1	bta-miR-2334	-4.35
TBRG1	bta-miR-2334	-4.35
PCMTD2	bta-miR-2334	-4.35
ERLIN2	bta-miR-2334	-4.35
PRUNE2	bta-miR-2334	-4.35
IMPAD1	bta-miR-2334	-4.35
GK5	bta-miR-2334	-4.35
DNMBP	bta-miR-2334	-4.35
NUP214	bta-miR-2334	-4.35
UGCG	bta-miR-2334	-4.35
OTUD3	bta-miR-2334	-4.35
PRDM5	bta-miR-2334	-4.35
MYNN	bta-miR-2334	-4.35
NFATC3	bta-miR-2334	-4.35
DBT	bta-miR-2334	-4.35
PDXDC1	bta-miR-2334	-4.35
KREMEN1	bta-miR-2334	-4.35
MAPK14	bta-miR-2334	-4.35
ZRANB1	bta-miR-2334	-4.35
ASAH1	bta-miR-2334	-4.35
CCDC92	bta-miR-2334	-4.35
TBL1X	bta-miR-2334	-4.35
DEPDC1	bta-miR-2334	-4.35
SGCB	bta-miR-2334	-4.35
DNAJC16	bta-miR-2334	-4.35
ZNF638	bta-miR-2334	-4.35
SALL4	bta-miR-2334	-4.35
ZDHHC17	bta-miR-2334	-4.35
NR0B1	bta-miR-2334	-4.35
GXYLT1	bta-miR-2334	-4.35
SLC9A9	bta-miR-2334	-4.35
SS18L1	bta-miR-2334	-4.35
SP1	bta-miR-2334	-4.35
VPS33A	bta-miR-2334	-4.35
YWHAZ	bta-miR-2334	-4.35
KIN	bta-miR-2334	-4.35
SLIT3	bta-miR-2334	-4.35
SRRM1	bta-miR-2334	-4.35
VPS26A	bta-miR-2334	-4.35
CIRBP	bta-miR-2334	-4.35
RAP2A	bta-miR-2334	-4.35
CLN6	bta-miR-2334	-4.35
CD47	bta-miR-2334	-4.35
RFK	bta-miR-2334	-4.35
SMAD4	bta-miR-2334	-4.35
SPTLC2	bta-miR-2334	-4.35
ESF1	bta-miR-2334	-4.35
RUFY1	bta-miR-2334	-4.35
PTPRM	bta-miR-2334	-4.35
SCAF1	bta-miR-2334	-4.35
PAQR7	bta-miR-2334	-4.35
FNBP1L	bta-miR-2334	-4.35
XIRP1	bta-miR-2334	-4.35
THBS1	bta-miR-2334	-4.35
ZNF398	bta-miR-2334	-4.35
DIP2B	bta-miR-2334	-4.35
KCTD15	bta-miR-2334	-4.35
ZKSCAN2	bta-miR-2334	-4.35
RICTOR	bta-miR-2334	-4.35
PIP4K2A	bta-miR-2334	-4.35
REEP5	bta-miR-2334	-4.35
ME1	bta-miR-2334	-4.35
TBC1D14	bta-miR-2334	-4.35
TEX261	bta-miR-2334	-4.35
IL2RA	bta-miR-2334	-4.35
VPS45	bta-miR-2334	-4.35
JMY	bta-miR-2334	-4.35
HEXA	bta-miR-2334	-4.35
PAWR	bta-miR-2334	-4.35
SNX1	bta-miR-2334	-4.35
ANKRD40	bta-miR-2334	-4.35
SF3B1	bta-miR-2334	-4.35
STRN	bta-miR-2334	-4.35
NAA40	bta-miR-2334	-4.35
CENPI	bta-miR-2334	-4.35
PWWP2A	bta-miR-2334	-4.35
SIPA1L2	bta-miR-2334	-4.35
ETS1	bta-miR-2334	-4.35
GNAI3	bta-miR-2334	-4.35
THRAP3	bta-miR-2334	-4.35
CPEB4	bta-miR-2334	-4.35
KDM2A	bta-miR-2334	-4.35
SQSTM1	bta-miR-2334	-4.35
KPNA3	bta-miR-2334	-4.35
OBFC1	bta-miR-2334	-4.35
TBC1D19	bta-miR-2334	-4.35
FGFR1OP	bta-miR-2334	-4.35
LSM12	bta-miR-2334	-4.35
PLCL2	bta-miR-2334	-4.35
MRPL46	bta-miR-2334	-4.35
JAG1	bta-miR-2334	-4.35
MAP2	bta-miR-2334	-4.35
CSE1L	bta-miR-2334	-4.35
RPAP2	bta-miR-2334	-4.35
VGLL4	bta-miR-2334	-4.35
SPAG9	bta-miR-2334	-4.35
SF3B3	bta-miR-2334	-4.35
FOXK2	bta-miR-2334	-4.35
IMPACT	bta-miR-2334	-4.35
NDFIP2	bta-miR-2334	-4.35
PPFIBP2	bta-miR-2334	-4.35
MRE11A	bta-miR-2334	-4.35
HOOK3	bta-miR-2334	-4.35
SEC31B	bta-miR-2334	-4.35
PIK3CA	bta-miR-2334	-4.35
BTF3L4	bta-miR-2334	-4.35
PPIP5K2	bta-miR-2334	-4.35
FKBP4	bta-miR-2334	-4.35
MAPKAP1	bta-miR-2334	-4.35
UBR4	bta-miR-2334	-4.35
KLHL7	bta-miR-2334	-4.35
MAP7	bta-miR-2334	-4.35
RRM1	bta-miR-2334	-4.35
AQR	bta-miR-2334	-4.35
SKP1	bta-miR-2334	-4.35
GAPVD1	bta-miR-2334	-4.35
UBR5	bta-miR-2334	-4.35
ZNF281	bta-miR-2334	-4.35
DCTN6	bta-miR-2334	-4.35
ZDHHC13	bta-miR-2334	-4.35
RNF2	bta-miR-2334	-4.35
MED28	bta-miR-2334	-4.35
DCAF5	bta-miR-2334	-4.35
LONP2	bta-miR-2334	-4.35
ENAH	bta-miR-2334	-4.35
IQGAP2	bta-miR-2334	-4.35
MON2	bta-miR-2334	-4.35
FSTL1	bta-miR-2334	-4.35
PAN2	bta-miR-2334	-4.35
BNC2	bta-miR-2334	-4.35
PUF60	bta-miR-2334	-4.35
RAB40B	bta-miR-2334	-4.35
RBX1	bta-miR-2334	-4.35
HMGCR	bta-miR-2334	-4.35
HNRNPU	bta-miR-2334	-4.35
TM9SF2	bta-miR-2334	-4.35
ERP44	bta-miR-2334	-4.35
MSH2	bta-miR-2334	-4.35
PDE9A	bta-miR-2334	-4.35
AGTPBP1	bta-miR-2334	-4.35
GRHPR	bta-miR-2334	-4.35
SIPA1	bta-miR-2334	-4.35
CEP120	bta-miR-2334	-4.35
SND1	bta-miR-2334	-4.35
DAP	bta-miR-2334	-4.35
CCDC127	bta-miR-2334	-4.35
ETFA	bta-miR-2334	-4.35
NETO1	bta-miR-2334	-4.35
CAPZB	bta-miR-2334	-4.35
TMEM106C	bta-miR-2334	-4.35
APC	bta-miR-2334	-4.35
KDELR1	bta-miR-2334	-4.35
SNAP25	bta-miR-2334	-4.35

## Sheet: Table S7
Table S7. Dataset of targets expressed in blastocyst of 10vs16 months contrast for IPA
Target molecules in dataset	Upstream Regulator	miRNAs
ATP5MF	RICTOR	bta-miR-2285b
ATP6V0A4	RICTOR	bta-miR-2285b
ATP6V1D	RICTOR	bta-miR-2285b
ATP6V1F	RICTOR	bta-miR-2285b
COX4I1	RICTOR	bta-miR-2285b
COX6A1	RICTOR	bta-miR-2285b
COX6B1	RICTOR	bta-miR-2285b
CYC1	RICTOR	bta-miR-2285b
EGR1	RICTOR	bta-miR-2285b
NDUFA3	RICTOR	bta-miR-2285b
NDUFS1	RICTOR	bta-miR-2285b
NDUFV1	RICTOR	bta-miR-2285b
PSMD7	RICTOR	bta-miR-2285b
RPL14	RICTOR	bta-miR-2285b
RPL18	RICTOR	bta-miR-2285b
RPL21	RICTOR	bta-miR-2285b
RPL7A	RICTOR	bta-miR-2285b
RPL9	RICTOR	bta-miR-2285b
RPS2	RICTOR	bta-miR-2285b
RPS26	RICTOR	bta-miR-2285b
SDHA	RICTOR	bta-miR-2285b
SDHB	RICTOR	bta-miR-2285b
SDHC	RICTOR	bta-miR-2285b
UQCRC1	RICTOR	bta-miR-2285b
ACTC1	KDM5A	bta-miR-2285b, bta-miR-2405
ATP6V1D	KDM5A	bta-miR-2285b, bta-miR-2405
ATP6V1F	KDM5A	bta-miR-2285b, bta-miR-2405
CHRNA1	KDM5A	bta-miR-2285b, bta-miR-2405
COX4I1	KDM5A	bta-miR-2285b, bta-miR-2405
COX6A1	KDM5A	bta-miR-2285b, bta-miR-2405
COX6B1	KDM5A	bta-miR-2285b, bta-miR-2405
DNAJC11	KDM5A	bta-miR-2285b, bta-miR-2405
NDUFA3	KDM5A	bta-miR-2285b, bta-miR-2405
NDUFV1	KDM5A	bta-miR-2285b, bta-miR-2405
PGD	KDM5A	bta-miR-2285b, bta-miR-2405
SDHB	KDM5A	bta-miR-2285b, bta-miR-2405
SDHC	KDM5A	bta-miR-2285b, bta-miR-2405
TXN2	KDM5A	bta-miR-2285b, bta-miR-2405
UQCRC1	KDM5A	bta-miR-2285b, bta-miR-2405
CHRNA1	CREB1	bta-miR-2285b
CNN1	CREB1	bta-miR-2285b
CSRP2	CREB1	bta-miR-2285b
EGR1	CREB1	bta-miR-2285b
ERRFI1	CREB1	bta-miR-2285b
FOS	CREB1	bta-miR-2285b
GRIA1	CREB1	bta-miR-2285b
HECA	CREB1	bta-miR-2285b
HSPA4	CREB1	bta-miR-2285b
JPT1	CREB1	bta-miR-2285b
MCM5	CREB1	bta-miR-2285b
NDUFV1	CREB1	bta-miR-2285b
NPAS4	CREB1	bta-miR-2285b
OSTF1	CREB1	bta-miR-2285b
PITPNB	CREB1	bta-miR-2285b
RGS2	CREB1	bta-miR-2285b
SCD	CREB1	bta-miR-2285b
SEMA4A	CREB1	bta-miR-2285b
SLC6A1	CREB1	bta-miR-2285b
SRXN1	CREB1	bta-miR-2285b
STRBP	CREB1	bta-miR-2285b

## Sheet: Table S8
Table S8. Dataset of targets expressed in blastocyst of 12vs16 months contrast for IPA
Target molecules in dataset	Upstream Regulator	miRNAs
ATP5PD	RICTOR	bta-miR-302a, bta-miR-2334
ATP6V0D2	RICTOR	bta-miR-302a, bta-miR-2334
COX7A2L	RICTOR	bta-miR-302a, bta-miR-2334
MRPL13	RICTOR	bta-miR-302a, bta-miR-2334
NDUFA5	RICTOR	bta-miR-302a, bta-miR-2334
NDUFB9	RICTOR	bta-miR-302a, bta-miR-2334
NDUFS1	RICTOR	bta-miR-302a, bta-miR-2334
PSMB7	RICTOR	bta-miR-302a, bta-miR-2334
PSMD8	RICTOR	bta-miR-302a, bta-miR-2334
RPL13A	RICTOR	bta-miR-302a, bta-miR-2334
RPL21	RICTOR	bta-miR-302a, bta-miR-2334
RPL4	RICTOR	bta-miR-302a, bta-miR-2334
RPSA	RICTOR	bta-miR-302a, bta-miR-2334
SDHA	RICTOR	bta-miR-302a, bta-miR-2334
SDHC	RICTOR	bta-miR-302a, bta-miR-2334
TCIRG1	RICTOR	bta-miR-302a, bta-miR-2334
UQCRB	RICTOR	bta-miR-302a, bta-miR-2334
UQCRC1	RICTOR	bta-miR-302a, bta-miR-2334
ATIC	STK11	bta-miR-2334
AVIL	STK11	bta-miR-2334
CCNA2	STK11	bta-miR-2334
IYD	STK11	bta-miR-2334
MYC	STK11	bta-miR-2334
NDUFB9	STK11	bta-miR-2334
NET1	STK11	bta-miR-2334
PHGDH	STK11	bta-miR-2334
PYCR1	STK11	bta-miR-2334
RAB10	STK11	bta-miR-2334
RRM1	STK11	bta-miR-2334
RRM2	STK11	bta-miR-2334
UQCRC1	STK11	bta-miR-2334
VAV3	STK11	bta-miR-2334
COQ7	KDM5A	bta-miR-2334
MCM3	KDM5A	bta-miR-2334
MYL4	KDM5A	bta-miR-2334
NDUFA5	KDM5A	bta-miR-2334
SDHC	KDM5A	bta-miR-2334
TIMM50	KDM5A	bta-miR-2334
UQCRC1	KDM5A	bta-miR-2334
CCNA2	AREG	bta-miR-34b
CENPF	AREG	bta-miR-34b
PRC1	AREG	bta-miR-34b
RRM2	AREG	bta-miR-34b
STX12	AREG	bta-miR-34b
